# Supplementary material for: Cobalt-catalyzed coupling reactions of 2-halobenzamides with alkynes: investigation of ligand-controlled dual pathways
Source: Royal Society of Chemistry journal article supplement (doi:10.1039/d1qo01402a), 2021-01-01
Supplement: d1qo01402a1.pdf [file d1qo01402a1.pdf]

*Supporting Information*

**Cobalt-Catalyzed Coupling Reactions of 2-Halobenzamides with Alkynes: Investigation of the Ligand-Controlled Dual Pathways**

Vijaykumar H. Thorat,<sup>a</sup> Hasil Aman,<sup>b</sup> Yu-Lin Tsai,<sup>a</sup> Gangaram Pallikonda,<sup>a</sup> Gary Jing Chuang<sup>\*b</sup>  
and Jen-Chieh Hsieh<sup>\*a</sup>

<sup>a</sup>*Department of Chemistry, Tamkang University, New Taipei City, 251301, Taiwan (R.O.C.)*

*[jchsieh@mail.tku.edu.tw](mailto:jchsieh@mail.tku.edu.tw)*

<sup>b</sup>*Department of Chemistry, Chung Yuan Christian University, Taoyuan, 320314, Taiwan (R.O.C.)*

*[gjchuang@cycu.edu.tw](mailto:gjchuang@cycu.edu.tw)*

| <b>Table of Contents</b>                                                        | <b>Page No</b> |
|---------------------------------------------------------------------------------|----------------|
| <b>General Information and procedure</b>                                        | <b>S2–S3</b>   |
| <b>Optimization study</b>                                                       | <b>S3–S4</b>   |
| <b>Synthetic procedures of substrates, alkaloids and O-cyclization products</b> | <b>S4–S7</b>   |
| <b>Spectral data for all products</b>                                           | <b>S8–S17</b>  |
| <b>References</b>                                                               | <b>S17</b>     |
| <b><sup>1</sup>H and <sup>13</sup>C NMR spectra of all products</b>             | <b>S18–S74</b> |
| <b><sup>1</sup>H and <sup>13</sup>C NMR spectra of 1a-f</b>                     | <b>S75</b>     |
| <b><sup>1</sup>H and <sup>13</sup>C NMR spectra of 4a-D</b>                     | <b>S76</b>     |
| <b>NOE spectra of products 3x</b>                                               | <b>S77</b>     |
| <b>X-ray data</b>                                                               | <b>S78–S84</b> |

### General information:

All reagents were purchased from Sigma-Aldrich, Alfa-Aesar, TCI and Fisher-Acros, which were used without further purification unless otherwise noted. All manipulations of oxygen- and moisture-sensitive materials were conducted with a standard Schlenk technique or in the glove box. Flash column chromatography was performed using silica gel (230–400 mesh). Analytical thin layer chromatography (TLC) was performed on 60 F<sub>254</sub> (0.25 mm) plates and visualization was accomplished with UV light (254 and 354 nm) and/or an aqueous alkaline KMnO<sub>4</sub> solution followed by heating. Proton and carbon nuclear magnetic resonance spectra (<sup>1</sup>H NMR and <sup>13</sup>C NMR) were recorded on Bruker 300, 400 or 600 spectrometer with Me<sub>4</sub>Si or solvent resonance as the internal standard (<sup>1</sup>H NMR, Me<sub>4</sub>Si at 0 ppm, CDCl<sub>3</sub> at 7.26 ppm, *d*<sub>6</sub>-DMSO at 2.49 ppm; <sup>13</sup>C NMR, Me<sub>4</sub>Si at 0 ppm, CDCl<sub>3</sub> at 77.0 ppm, *d*<sub>6</sub>-DMSO at 39.7 ppm). <sup>1</sup>H NMR data are reported as follows: chemical shift, multiplicity (s = singlet, d = doublet, t = triplet, q = quartet, quint = quintet, sext = sextet, sept = septet, br = broad, m = multiplet), coupling constants (Hz), and integration. IR spectral data were recorded on a Bruker TENSOR 37 spectrometer. Melting points (mp) were determined using SRS OptiMelt MPA100 or Buchi B-540. GC-MS data were obtained from the HP 5890 Series II GC/HP 5972 GC MASS Spectrometer System. High Resolution Mass spectral data were obtained from MAT-95XL HRMS by using EI method. X-ray data was obtained from Bruker APEX DUO.

### General procedure for the Co-catalyzed cyclization reaction:

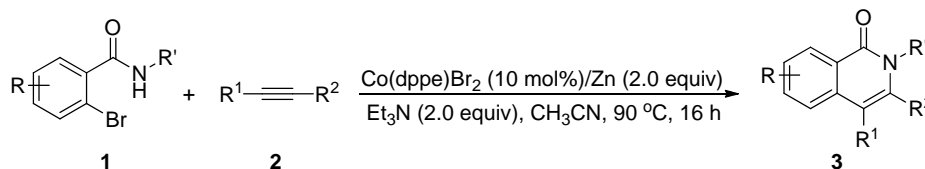

Addition of all reagents was conducted in a glove box. A screw-capped vial (10-mL) was added Co(dppe)Br<sub>2</sub> (dppe = 1,2-bis(diphenylphosphino)ethane) (31 mg, 0.05 mmol), Zn (1.0 mmol), NEt<sub>3</sub> (1.0 mmol), substrate **1** (0.5 mmol) and alkyne **2** (0.75 mmol) in dry CH<sub>3</sub>CN (1.5 mL). The vial was then removed from the glove box, and allowed to stir at 90 °C for 16 h. The mixture was filtered through a celite pad and washed with CH<sub>2</sub>Cl<sub>2</sub>. The filtrate was concentrated and the residue was purified through a column chromatography by using hexane and ethyl acetate as eluent to afford the desired products **3**.

All structures were characterized by the HRMS, <sup>1</sup>H NMR and <sup>13</sup>C NMR spectra; products **3a** and **3w** were verified by single crystal X-ray diffraction. Spectral data, melting point, IR data, HRMS data and the copies of <sup>1</sup>H NMR and <sup>13</sup>C NMR spectra for all compounds are listed below.

### General procedure for the Co-catalyzed reductive coupling reaction:

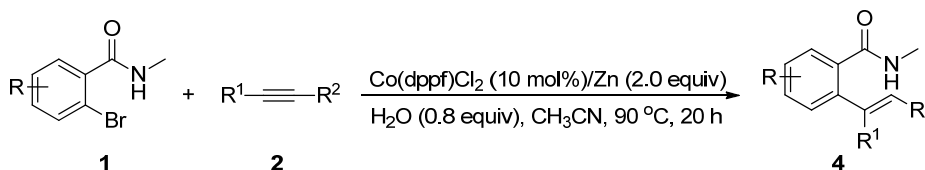

Addition of all reagents was conducted in a glove box. A screw-capped vial (10-mL) was added Co(dppf)Cl<sub>2</sub> (dppf = 1,2-bis(diphenylphosphino)ferrocene) (33 mg, 0.05 mmol), Zn (1.0 mmol), H<sub>2</sub>O (0.4 mmol), substrate **1** (0.5 mmol) and alkyne **2** (0.6 mmol) in dry CH<sub>3</sub>CN (2.0 mL). The vial was then removed from the glove box, and allowed to stir at 90 °C for 20 h. The mixture was filtered through a celite pad and washed with CH<sub>2</sub>Cl<sub>2</sub>. The filtrate was concentrated and the residue was purified through a column chromatography by using hexane and ethyl acetate as eluent to afford the desired products **4**.

All structures were characterized by the HRMS, <sup>1</sup>H NMR and <sup>13</sup>C NMR spectra; products **4a** and **4v** were verified by single crystal X-ray diffraction. Spectral data, melting point, IR data, HRMS data and the copies of <sup>1</sup>H NMR and <sup>13</sup>C NMR spectra for all compounds are listed below.

**Table S1. Optimization study of the Co-catalyzed cyclization<sup>a, b</sup>**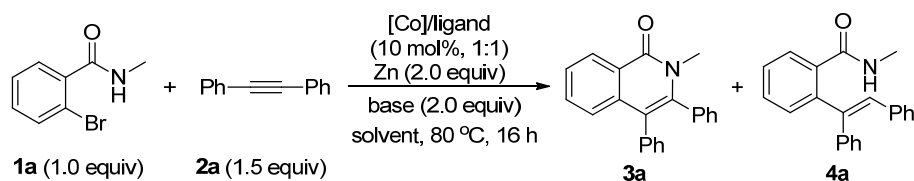

| entry | [Co]/ligand                        | base              | solvent            | yield (%) |       | entry | [Co]/ligand             | base                           | solvent            | yield (%) |    |
|-------|------------------------------------|-------------------|--------------------|-----------|-------|-------|-------------------------|--------------------------------|--------------------|-----------|----|
|       |                                    |                   |                    | 3a        | 4a    |       |                         |                                |                    | 3a        | 4a |
| 1     | CoI <sub>2</sub> /PPh <sub>3</sub> | Et <sub>3</sub> N | CH <sub>3</sub> CN | 9         | 23    | 13    | Co(dppe)Br <sub>2</sub> | pyrrolidine                    | CH <sub>3</sub> CN | 10        | 16 |
| 2     | CoI <sub>2</sub> /PCy <sub>3</sub> | Et <sub>3</sub> N | CH <sub>3</sub> CN | 18        | 20    | 14    | Co(dppe)Br <sub>2</sub> | morpholine                     | CH <sub>3</sub> CN | trace     | 13 |
| 3     | CoI <sub>2</sub> /dppe             | Et <sub>3</sub> N | CH <sub>3</sub> CN | 58        | trace | 15    | Co(dppe)Br <sub>2</sub> | DIPEA                          | CH <sub>3</sub> CN | trace     | 36 |
| 4     | CoI <sub>2</sub> /dppp             | Et <sub>3</sub> N | CH <sub>3</sub> CN | 46        | 8     | 16    | Co(dppe)Br <sub>2</sub> | DBU                            | CH <sub>3</sub> CN | 21        | 17 |
| 5     | CoI <sub>2</sub> /dppb             | Et <sub>3</sub> N | CH <sub>3</sub> CN | 41        | 27    | 17    | Co(dppe)Br <sub>2</sub> | NaHCO <sub>3</sub>             | CH <sub>3</sub> CN | trace     | 13 |
| 6     | CoI <sub>2</sub> /dppm             | Et <sub>3</sub> N | CH <sub>3</sub> CN | 14        | 17    | 18    | Co(dppe)Br <sub>2</sub> | K <sub>2</sub> CO <sub>3</sub> | CH <sub>3</sub> CN | trace     | 22 |
| 7     | CoI <sub>2</sub> /dppf             | Et <sub>3</sub> N | CH <sub>3</sub> CN | 0         | 31    | 19    | Co(dppe)Br <sub>2</sub> | Et <sub>3</sub> N              | DMSO               | 19        | 24 |
| 8     | Co(acac) <sub>2</sub> /dppe        | Et <sub>3</sub> N | CH <sub>3</sub> CN | 41        | 8     | 20    | Co(dppe)Br <sub>2</sub> | Et <sub>3</sub> N              | DMF                | 22        | 15 |
| 9     | Co(dppe)I <sub>2</sub>             | Et <sub>3</sub> N | CH <sub>3</sub> CN | 68        | 17    | 21    | Co(dppe)Br <sub>2</sub> | Et <sub>3</sub> N              | THF                | 46        | 10 |
| 10    | Co(dppe)Br <sub>2</sub>            | Et <sub>3</sub> N | CH <sub>3</sub> CN | 63        | 10    | 22    | Co(dppe)Br <sub>2</sub> | Et <sub>3</sub> N              | 1,4-dioxane        | 53        | 11 |
| 11    | Co(dppf)Br <sub>2</sub>            | Et <sub>3</sub> N | CH <sub>3</sub> CN | 0         | 45    | 23    | Co(dppe)Br <sub>2</sub> | Et <sub>3</sub> N              | DCM                | trace     | 20 |
| 12    | Co(dppe)Br <sub>2</sub>            | pyridine          | CH <sub>3</sub> CN | 18        | 13    | 24    | Co(dppe)Br <sub>2</sub> | Et <sub>3</sub> N              | toluene            | 18        | 0  |

<sup>a</sup>Reaction conditions: **1a** (0.2 mmol, 1.0 equiv), **2a** (0.3 mmol, 1.5 equiv), cobalt source (0.02 mmol, 10 mol%), bidentate ligand (0.02 mol, 10 mol%; for PPh<sub>3</sub>, 20 mol% was used), base (0.4 mmol, 2 equiv) in 0.6 mL solvent at 80 °C for 16 h.

<sup>b</sup>Yields were measured from the crude products by <sup>1</sup>H NMR integration method using mesitylene as an internal standard.

**Table S2. Optimization study of the Co-catalyzed cyclization<sup>a, b</sup>**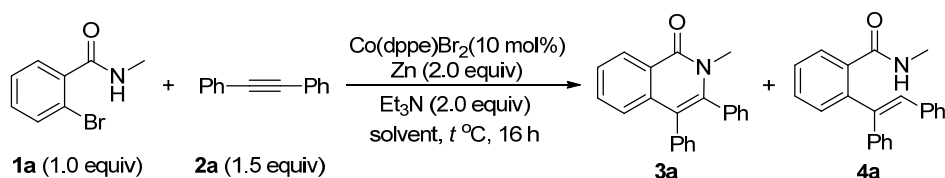

| entry | solvent            | <i>t</i> (°C) | yield (%) |    | entry | solvent     | <i>t</i> (°C) | yield (%) |    |
|-------|--------------------|---------------|-----------|----|-------|-------------|---------------|-----------|----|
|       |                    |               | 3a        | 4a |       |             |               | 3a        | 4a |
| 1     | CH <sub>3</sub> CN | 80            | 63        | 10 | 7     | 1,4-dioxane | 90            | 67        | 21 |
| 2     | CH <sub>3</sub> CN | 90            | 73        | 6  | 8     | toluene     | 80            | 18        | 0  |
| 3     | CH <sub>3</sub> CN | 100           | 58        | 13 | 9     | toluene     | 90            | 26        | 0  |
| 4     | THF                | 80            | 46        | 10 | 10    | toluene     | 100           | 41        | 0  |
| 5     | THF                | 90            | 57        | 12 | 11    | toluene     | 110           | 38        | 0  |
| 6     | 1,4-dioxane        | 80            | 53        | 11 | 12    | toluene     | 120           | 19        | 0  |

<sup>a</sup>Reaction conditions: **1a** (0.2 mmol, 1.0 equiv), **2a** (0.3 mmol, 1.5 equiv), Co(dppe)Br<sub>2</sub> (0.02 mmol, 10 mol%), Et<sub>3</sub>N (0.4 mmol, 2 equiv) in 0.6 mL solvent at *t* °C for 16 h. <sup>b</sup>Yields were measured from the crude products by <sup>1</sup>H NMR integration method using mesitylene as an internal standard.

**Table S3. Optimization study of the Co-catalyzed reductive coupling reaction<sup>a, b</sup>**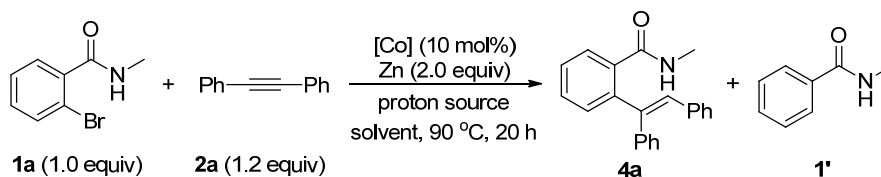

| entry | [Co]                    | proton source (x equiv)      | solvent            | yield (%) |    |
|-------|-------------------------|------------------------------|--------------------|-----------|----|
|       |                         |                              |                    | 4a        | 1' |
| 1     | CoI <sub>2</sub> /dppf  | H <sub>2</sub> O (1.0 equiv) | CH <sub>3</sub> CN | 61        | 14 |
| 2     | Co(dppf)I <sub>2</sub>  | H <sub>2</sub> O (1.0 equiv) | CH <sub>3</sub> CN | 67        | 20 |
| 3     | Co(dppf)Br <sub>2</sub> | H <sub>2</sub> O (1.0 equiv) | CH <sub>3</sub> CN | 71        | 18 |
| 4     | Co(dppf)Cl <sub>2</sub> | H <sub>2</sub> O (1.0 equiv) | CH <sub>3</sub> CN | 74        | 12 |
| 5     | Co(dppf)Cl <sub>2</sub> | H <sub>2</sub> O (1.2 equiv) | CH <sub>3</sub> CN | 54        | 33 |
| 6     | Co(dppf)Cl <sub>2</sub> | H <sub>2</sub> O (0.8 equiv) | CH <sub>3</sub> CN | 79        | 11 |
| 7     | Co(dppf)Cl <sub>2</sub> | H <sub>2</sub> O (0.6 equiv) | CH <sub>3</sub> CN | 71        | 6  |
| 8     | Co(dppf)Cl <sub>2</sub> | H <sub>2</sub> O (0.4 equiv) | CH <sub>3</sub> CN | 57        | 7  |
| 8     | Co(dppf)Cl <sub>2</sub> | MeOH (1.0 equiv)             | CH <sub>3</sub> CN | 43        | 45 |
| 9     | Co(dppf)Cl <sub>2</sub> | EtOH (1.0 equiv)             | CH <sub>3</sub> CN | 73        | 10 |
| 10    | Co(dppf)Cl <sub>2</sub> | IPA (1.0 equiv)              | CH <sub>3</sub> CN | 79        | 11 |
| 11    | Co(dppf)Cl <sub>2</sub> | TFA (1.0 equiv)              | CH <sub>3</sub> CN | 38        | 45 |
| 12    | Co(dppf)Cl <sub>2</sub> | 2,6-DTBP (1.0 equiv)         | CH <sub>3</sub> CN | 74        | 5  |
| 13    | Co(dppf)Cl <sub>2</sub> | HOAc (1.0 equiv)             | CH <sub>3</sub> CN | 27        | 61 |
| 14    | Co(dppf)Cl <sub>2</sub> | H <sub>2</sub> O (1.0 equiv) | THF                | 21        | 64 |
| 15    | Co(dppf)Cl <sub>2</sub> | H <sub>2</sub> O (1.0 equiv) | DMF                | 16        | 57 |

<sup>a</sup>Reaction conditions: **1a** (0.2 mmol, 1.0 equiv), **2a** (0.24 mmol, 1.2 equiv), Co(dppf)X<sub>2</sub> (0.02 mmol, 10 mol%), proton source (x equiv) in 0.8 mL dry solvent at 90 °C for 20 h. <sup>b</sup>Yields were measured from the crude products by <sup>1</sup>H NMR integration method using mesitylene as an internal standard. IPA = isopropanol; 2,6-DTBP = 2,6-di-*tert*-butylphenol.

### Procedure for the synthesis of 2-halo-*N*-substitutedbenzamide (**1**):<sup>1</sup>

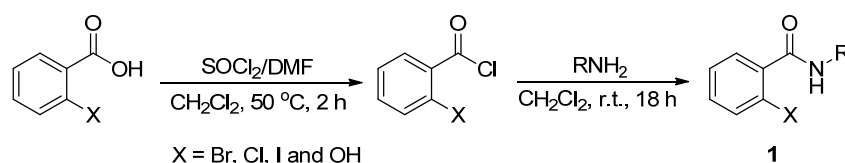

2-Halo-benzoic acid (20 mmol, 1.0 equiv) stirring in SOCl<sub>2</sub> (12.5 mL) was added DMF (0.1 mL) and kept stirring at 50 °C for 2 h. The resulted mixture was concentrated *in vacuo* and then dissolved in CH<sub>2</sub>Cl<sub>2</sub> (100 mL). Amine (40 mmol, 2.0 equiv) was then added to the residue/CH<sub>2</sub>Cl<sub>2</sub> solution at 0 °C and kept stirring at room temperature for 18 h. Upon completion of the reaction as observed by TLC, the mixture was diluted with 10% HCl solution at 0 °C and then extracted with EtOAc (4 x 150 mL). The organic layer was collected, dried over anhydrous Na<sub>2</sub>SO<sub>4</sub> and concentrated *in vacuo*. The residue was purified by flash column chromatography to give compound **1**. The spectral data and the copies of NMR spectra, please see reference 1 for the detail.

### Procedure for the synthesis of 2-(methylcarbamoyl)phenyltrifluoromethanesulfonate (1a-f):

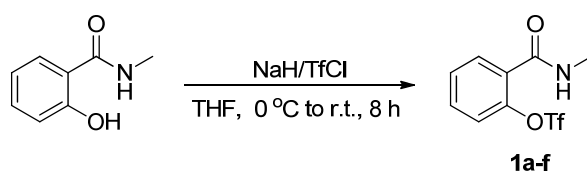

2-Hydroxy-N-methylbenzamide (554 mg, 4 mmol, 1.0 equiv) was kept stirring with NaH (336 mg, 14 mmol, 3.5 equiv) in THF (20 mL) at 0 °C for 2 h. The suspension solution was then moved from ice bath and allowed to increase the temperature slowly from 0 °C to room temperature. TfCl (0.47 mL) was added into the solution mixture and kept stirring at room temperature for 6 h. Upon completion of the reaction as observed by TLC, the mixture was extracted by brine and EtOAc (3 x 50 mL), and the organic layer was collected, dried over anhydrous MgSO<sub>4</sub> and concentrated *in vacuo*. The residue was purified through a flash column chromatography by using hexane and ethyl acetate as eluent to provide the desired compound as white powder (962 mg, 85%); mp: 86 °C; IR (KBr): 3287, 1638, 1207, 901, 729, 626, 519, 467 cm<sup>-1</sup>; <sup>1</sup>H NMR (600 MHz, CDCl<sub>3</sub>) δ 7.80 (dd, *J* = 7.5, 1.8 Hz, 1H), 7.54 (td, *J* = 7.5, 1.8 Hz, 1H), 7.46 (td, *J* = 7.5, 0.9 Hz, 1H), 7.33 (d, *J* = 8.1 Hz, 1H), 3.02 (d, *J* = 4.8 Hz, 3H); <sup>13</sup>C NMR (150 MHz, CDCl<sub>3</sub>) δ 164.6, 146.0, 132.2, 131.0, 129.6, 128.7, 122.2, 118.6 (q, *J*<sub>C-F</sub> = 318 Hz), 26.8; HRMS [(ESI), (M+H)<sup>+</sup>]: 284.0204 (cal. for C<sub>9</sub>H<sub>9</sub>NO<sub>4</sub>F<sub>3</sub>S 284.0204); New compound.

### Procedure for the synthesis of 4-(benzo[d][1,3]dioxol-5-yl)but-3-yn-1-ol (2n):

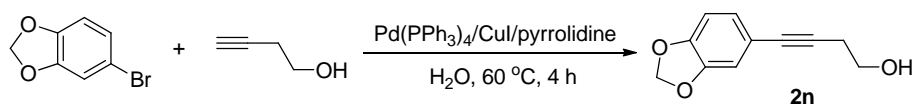

To a solution of 1-bromo-3,4-(methylenedioxy)benzene (2.05 mL, 17 mmol, 1.0 equiv) in ultra pure water (35 mL) was added but-3-yn-1-ol (1.54 mL, 20.4 mmol, 1.2 equiv), pyrrolidine (1.40 mL, 17 mmol, 1.0 equiv), Pd(PPh<sub>3</sub>)<sub>4</sub> (982 mg, 0.85 mmol, 5 mol%) and CuI (324 mg, 1.7 mmol, 10 mol%) under nitrogen atmosphere. The reaction mixture was kept stirring at 60 °C for 4 h and cooled to the room temperature. The aqueous layer was extracted with EtOAc (100 mL×2), and the organic layer was washed with H<sub>2</sub>O and brine, dried over MgSO<sub>4</sub> and concentrated *in vacuo*. The residue was purified by flash column chromatography [*R*<sub>f</sub> = 0.4 (25 % ethyl acetate in hexanes)] to give compound **2n** as brownish oil (2.59 g, 80%); IR (KBr): 3005, 1643, 1275, 1260, 1038 cm<sup>-1</sup>; <sup>1</sup>H NMR (600 MHz, CDCl<sub>3</sub>) δ 6.92 (dd, *J* = 8.4, 1.2 Hz, 1H), 6.85 (d, *J* = 1.2 Hz, 1H), 6.71 (d, *J* = 7.8 Hz, 1H), 5.94 (s, 2H), 3.78 (t, *J* = 6.0 Hz, 2H), 2.64 (t, *J* = 6.0 Hz, 2H); <sup>13</sup>C NMR (150 MHz, CDCl<sub>3</sub>) δ 147.5, 147.3, 126.0, 116.5, 111.6, 108.3, 101.2, 84.6, 82.1, 61.1, 23.7; HRMS [(EI), (M<sup>+</sup>)]: 190.0627 (cal. for C<sub>11</sub>H<sub>10</sub>O<sub>3</sub> 190.0630); Registry Number: [912649-12-8].

### Procedure for the synthesis of (Z)-N-(3,4-diphenyl-1H-isochromen-1-ylidene)methanamine (6):

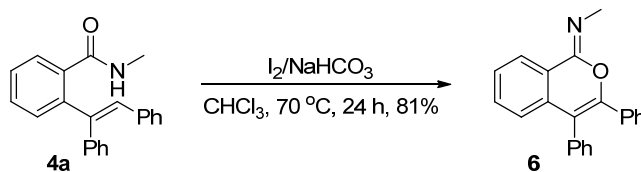

Compound **4a** (125 mg, 0.4 mmol, 1.0 equiv), I<sub>2</sub> (340 mg, 1.2 mmol, 3.0 equiv) and NaHCO<sub>3</sub> (100 mg, 1.2 mmol, 3.0 equiv) in CHCl<sub>3</sub> (5 mL) was kept stirring at 70 °C. Upon completion of the reaction as observed by TLC, the mixture was diluted with CH<sub>2</sub>Cl<sub>2</sub>, filtered through a celite pad, washed with CH<sub>2</sub>Cl<sub>2</sub>, and then concentrated *in vacuo*. The residue was purified by flash column chromatography to

afford compound **6** as yellow solid (100 mg, 81%); mp: 130 °C; IR(KBr): 3450, 1664, 1383, 756, 698  $\text{cm}^{-1}$ ;  $^1\text{H}$  NMR (600 MHz,  $\text{CDCl}_3$ ):  $\delta$  8.28 (d,  $J = 7.2$  Hz, 1H), 7.40–7.35 (m, 5H), 7.31–7.30 (m, 2H), 7.25–7.18 (m, 4H), 6.99 (d,  $J = 7.8$  Hz, 1H), 6.85–6.83 (m, 1H), 3.29 (s, 3H);  $^{13}\text{C}$  NMR (150 MHz,  $\text{CDCl}_3$ ):  $\delta$  151.9, 148.9, 135.1, 134.6, 133.9, 131.5, 131.4, 128.9, 128.7, 128.5, 127.9, 127.8, 127.7, 126.6, 126.2, 123.7, 115.4, 33.6; HRMS [(ESI), (M+H) $^+$ ]: 312.1388 (cal. for  $\text{C}_{22}\text{H}_{18}\text{NO}$  312.1391); New compound.

**Procedure for the synthesis of (Z)-N-(3-benzyl-3-phenylisobenzofuran-1(3H)-ylidene)methanamine (7):**

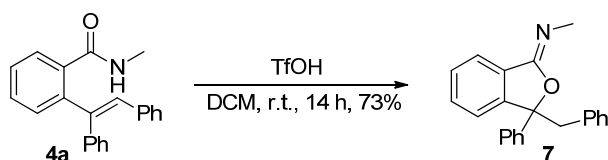

Compound **4a** (250 mg, 0.8 mmol) in  $\text{CH}_2\text{Cl}_2$  (10 mL) was slowly added TfOH (48 mg, 0.32 mmol, 40 mol%), and kept stirring at room temperature. Upon completion of the reaction as observed by TLC, the mixture was diluted with  $\text{CH}_2\text{Cl}_2$ , filtered through a celite pad and washed with  $\text{CH}_2\text{Cl}_2$ . The filtrate was then extracted by  $\text{CH}_2\text{Cl}_2$  and brine solution. The combined organic layer was collected, dried over anhydrous  $\text{Na}_2\text{SO}_4$  and concentrated *in vacuo*. The residue was purified by flash column chromatography using ethyl acetate and hexane as eluent to afford compound **7** as yellow solid (183 mg, 73%); mp: 148 °C; IR(KBr): 3415, 1713, 1244, 638, 516  $\text{cm}^{-1}$ ;  $^1\text{H}$  NMR (600 MHz,  $\text{CDCl}_3$ ):  $\delta$  8.22 (d,  $J = 7.8$  Hz, 1H), 7.86 (t,  $J = 7.2$  Hz, 1H), 7.63 (d,  $J = 7.8$  Hz, 1H), 7.57 (t,  $J = 7.2$  Hz, 1H), 7.48–7.46 (m, 5H), 7.16 (t,  $J = 7.2$  Hz, 1H), 7.08 (t,  $J = 7.2$  Hz, 2H), 6.76 (d,  $J = 7.2$  Hz, 2H), 3.90 (d,  $J = 14.4$  Hz, 1H), 3.77 (d,  $J = 14.4$  Hz, 1H), 3.33 (s, 3H);  $^{13}\text{C}$  NMR (150 MHz,  $\text{CDCl}_3$ ):  $\delta$  171.2, 149.5, 136.5, 136.1, 131.7, 130.9, 130.0, 129.3, 128.3, 128.0, 126.1, 125.5, 123.4, 123.3, 102.4, 45.5, 30.2; HRMS [(ESI), (M+H) $^+$ ]: 314.1543 (cal. for  $\text{C}_{22}\text{H}_{20}\text{NO}$  314.1545); New compound.

**Synthetic pathway to approach oxynitidine and nitidine chloride:**

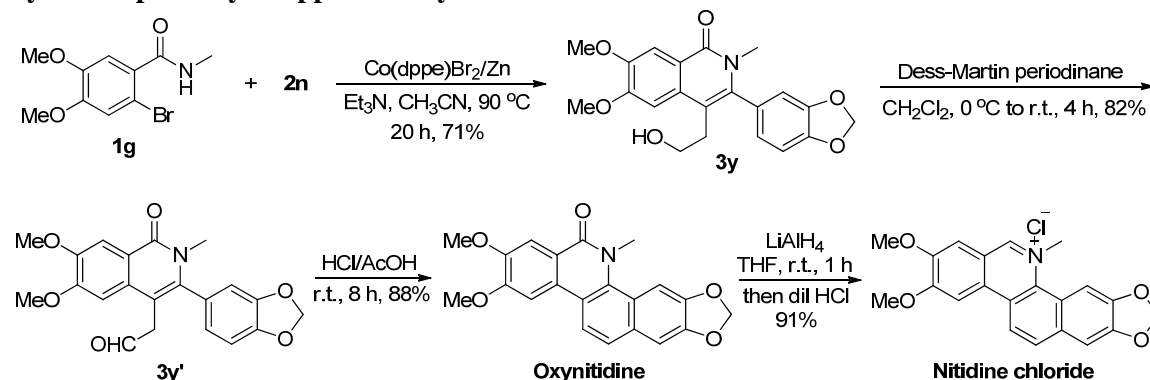

**Procedures and spectral data:**

**Procedure for the synthesis compound 3y:**

In an nitrogen-filled glove box, a 4-mL vial equipped with a magnetic stirrer bar was charged sequentially with **1g** (136 mg, 0.5 mmol, 1.0 equiv), **2n** (143 mg, 0.75 mmol, 1.5 equiv),  $\text{Co(dppe)Br}_2$  (62 mg, 0.1 mmol), Zn (65 mg, 1.0 mmol), and  $\text{Et}_3\text{N}$  (0.14 mL, 1.0 mmol, 2.0 equiv), followed by the addition of  $\text{CH}_3\text{CN}$  (1.5 mL). The vial was closed and removed from the glove box, and the mixture was kept stirring at 90 °C for 20 h. Upon cooling to room temperature, the reaction mixture was diluted with  $\text{CH}_2\text{Cl}_2$  (10 mL) and filtered through a celite pad with additional  $\text{CH}_2\text{Cl}_2$  (10 mL) as an eluent. The organic solution was concentrated under reduced pressure, and the residue was purified through flash column chromatography [ $R_f = 0.2$  (75 % ethyl acetate in hexanes)] to give the desired compound **3y** as white solid (136 mg, 71%); mp: 237 °C; IR (KBr): 2875, 1636, 1240, 1034  $\text{cm}^{-1}$ ;  $^1\text{H}$  NMR (600 MHz,  $\text{CDCl}_3$ )  $\delta$  7.90 (s, 1H), 7.11 (s, 1H), 6.93 (d,  $J = 8.4$  Hz, 1H), 6.74–6.73 (m, 2H),

6.07 (s, 2H), 4.03 (s, 3H), 4.01 (s, 3H), 3.72 (t,  $J = 7.2$  Hz, 2H), 3.26 (s, 3H), 2.82–2.73 (m, 2H);  $^{13}\text{C}$  NMR (150 MHz,  $\text{CDCl}_3$ )  $\delta$  161.7, 153.4, 149.1, 148.2, 148.0, 140.2, 131.7, 128.9, 123.1, 119.6, 110.9, 109.7, 108.8, 108.2, 103.7, 101.5, 62.5, 56.2, 56.1, 34.0, 31.9; HRMS [(EI), ( $\text{M}^+$ )]: 383.1363 (cal. for  $\text{C}_{21}\text{H}_{21}\text{NO}_6$  383.1369); Registry Number: [1207666-57-6].

**Procedure for the synthesis compound  $3\mathbf{y}'$ :**

Compound  $3\mathbf{y}$  (115 mg, 0.3 mmol, 1.0 equiv) was dissolved in dry  $\text{CH}_2\text{Cl}_2$  (10 mL) and stirred at 0 °C in an ice bath. The solution was added Dess-Martin periodinane (191 mg, 0.45 mmol, 1.5 equiv) in one portion and the reaction was kept stirring at room temperature for 4 h. The reaction was quenched at 0°C by stirring with a solution of  $\text{Na}_2\text{S}_2\text{O}_3$  (0.2 g in 5 mL water) and  $\text{NaHCO}_3(\text{aq})$  (saturated, 5 mL) for 10 min to quench the unreacted Dess-Martin reagent. The reaction mixture was diluted with  $\text{CH}_2\text{Cl}_2$ , and extracted by aqueous  $\text{NaHCO}_3$ . The combined organic layer was collected, dried over the  $\text{MgSO}_4$  and concentrated *in vacuo*. The residue was purified through flash column chromatography [ $R_f = 0.5$  (40% ethyl acetate in hexanes)] to give the compound  $3\mathbf{y}'$  as pale yellow solid (94 mg, 82%); mp: 223 °C; IR (KBr): 3005, 1716, 1638, 1514, 1274, 1035  $\text{cm}^{-1}$ ;  $^1\text{H}$  NMR (600 MHz,  $\text{CDCl}_3$ )  $\delta$  9.56 (s, 1H), 7.87 (s, 1H), 6.91 (d,  $J = 8.4$  Hz, 1H), 6.75 (s, 1H), 6.71–6.70 (m, 2H), 6.05 (s, 2H), 3.99 (s, 3H), 3.93 (s, 3H), 3.51–3.50 (m, 2H), 3.30 (s, 3H);  $^{13}\text{C}$  NMR (150 MHz,  $\text{CDCl}_3$ )  $\delta$  199.6, 161.8, 153.5, 149.2, 148.4, 148.3, 141.6, 131.4, 128.4, 122.9, 119.4, 109.3, 109.0, 108.3, 106.0, 103.3, 101.6, 56.2, 56.0, 44.4, 34.2; HRMS [(EI), ( $\text{M}^+$ )]: 381.1216 (cal. for  $\text{C}_{21}\text{H}_{19}\text{NO}_6$  381.1212); Registry Number: [1207666-60-1].

**Procedure for the synthesis of oxynitidine:**

To a solution of compound  $3\mathbf{y}'$  (114 mg, 0.3 mmol, 1.0 equiv) in acetic acid (4 mL) was added 10% hydrochloric acid (0.2 mL) at room temperature. After stirring the reaction for 8 h, acetic acid was removed *in vacuo*. The resulted solid was then dissolved in  $\text{CH}_2\text{Cl}_2$  and extracted by aqueous  $\text{NaHCO}_3$ . The combined organic layer was collected, dried over the  $\text{MgSO}_4$  and concentrated *in vacuo*. The residue was purified through flash column chromatography [ $R_f = 0.59$  (70% ethyl acetate in hexanes)] to give oxynitidine as white solid (96 mg, 88%); mp: 279 °C; IR (KBr): 3005, 1637, 1274, 1041  $\text{cm}^{-1}$ ;  $^1\text{H}$  NMR (600 MHz,  $\text{CDCl}_3$ )  $\delta$  7.99 (d,  $J = 9.0$  Hz, 1H), 7.93 (s, 1H), 7.64 (s, 1H), 7.59 (s, 1H), 7.56 (d,  $J = 9.0$  Hz, 1H), 7.18 (s, 1H), 6.10 (s, 2H), 4.10 (s, 3H), 4.06 (s, 3H), 3.98 (s, 3H);  $^{13}\text{C}$  NMR (150 MHz,  $\text{CDCl}_3$ )  $\delta$  164.3, 153.5, 149.7, 147.5, 147.0, 135.9, 131.8, 128.9, 123.2, 121.0, 119.1, 118.3, 116.7, 108.6, 104.8, 102.8, 102.6, 101.5, 56.3, 56.1, 41.2; HRMS [(EI), ( $\text{M}^+$ )]: 363.1110 (cal. for  $\text{C}_{21}\text{H}_{17}\text{NO}_5$  363.1107); Registry Number: [548-31-2].

**Procedure for the synthesis of nitidine chloride:**

$\text{LiAlH}_4$  (11 mg, 0.3 mmol, 1.0 equiv) was added to a solution of oxynitidine (109 mg, 0.3 mmol, 1.0 equiv) in dry THF (5 mL) and kept stirring at room temperature for 60 min. EtOAc was then added to quench the excess hydride. Filter and concentrated, the reaction residue was then treated with 10% HCl (5 mL) at room temperature. the resulting precipitates were collected by filtration to afford nitidine chloride as yellow solid (95 mg, 91%); mp: 280 °C; IR (KBr): 1260, 1275, 1636  $\text{cm}^{-1}$ ;  $^1\text{H}$  NMR (600 MHz,  $\text{DMSO}-d_6$ )  $\delta$  9.87 (s, 1H), 8.89 (d,  $J = 9.0$  Hz, 1H), 8.35 (s, 1H), 8.30 (s, 1H), 8.27 (d,  $J = 9.0$  Hz, 1H), 7.91 (s, 1H), 7.76 (s, 1H), 6.33 (s, 2H), 4.89 (s, 3H), 4.22 (s, 3H), 4.03 (s, 3H);  $^{13}\text{C}$  NMR (150 MHz,  $\text{CDCl}_3$ )  $\delta$  164.3, 153.5, 149.7, 147.5, 147.0, 135.9, 131.9, 128.9, 123.2, 121.0, 119.2, 118.4, 116.7, 108.7, 104.8, 102.8, 102.7, 101.5, 56.3, 56.1, 41.2; HRMS [(FAB), ( $\text{M}^+$ )]: 348.1236 (cal. for  $\text{C}_{21}\text{H}_{18}\text{NO}_4^+$  348.1236); Registry Number: [13063-04-2].

## Spectral data for all products:

### 2-Methyl-3,4-diphenylisoquinolin-1(2H)-one (3a):

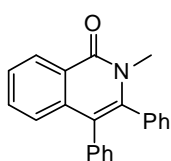

Work-up and purification by column chromatography, white solid (117 mg, 75%), mp: 246–248 °C; IR (KBr): 1646, 1604, 1552, 1489, 1414, 1176, 1074, 1025, 924, 781  $\text{cm}^{-1}$ ;  $^1\text{H}$  NMR (600 MHz,  $\text{CDCl}_3$ ):  $\delta$  8.57 (d,  $J = 7.6$  Hz, 1H), 7.53–7.47 (m, 2H), 7.26–7.12 (m, 9H), 7.07–7.05 (m, 2H), 3.36 (s, 3H);  $^{13}\text{C}$  NMR (150 MHz,  $\text{CDCl}_3$ ):  $\delta$  162.7, 141.2, 137.1, 136.4, 135.0, 132.0, 131.5, 129.9, 128.1, 127.9, 127.7, 126.7, 126.5, 125.3, 124.9, 118.8, 34.3; HRMS [(ESI), (M+H) $^+$ ]: 312.1374 (cal. for  $\text{C}_{22}\text{H}_{18}\text{NO}$  312.1388); Registry Number: [148564-77-6].

### 7-Methoxy-2-methyl-3,4-diphenylisoquinolin-1(2H)-one (3b):

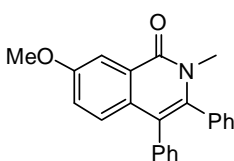

Work-up and purification by column chromatography, white solid (111 mg, 65%), mp: 213–214 °C; IR (KBr): 2946, 1641, 1606, 1589, 1497, 1352, 1253, 1146, 1052, 949, 833, 727  $\text{cm}^{-1}$ ;  $^1\text{H}$  NMR (600 MHz,  $\text{CDCl}_3$ ):  $\delta$  7.96 (s, 1H), 7.26–7.05 (m, 12H), 3.96 (s, 3H), 3.37 (s, 3H);  $^{13}\text{C}$  NMR (150 MHz,  $\text{CDCl}_3$ ):  $\delta$  162.4, 158.6, 138.9, 136.6, 135.1, 131.5, 131.3, 130.2, 128.1, 128.1, 127.9, 127.1, 126.7, 126.1, 122.5, 118.9, 107.5, 55.7, 34.5; HRMS [(EI), (M $^+$ )]: 341.1416 (cal. for  $\text{C}_{23}\text{H}_{19}\text{NO}_2$  341.1416); Registry Number: [1235478-95-1].

### 2,7-Dimethyl-3,4-diphenylisoquinolin-1(2H)-one (3c):

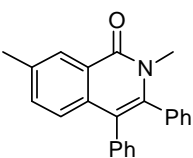

Work-up and purification by column chromatography, colorless solid (104 mg, 64%), mp: 224–225 °C; IR (KBr): 1645, 1499, 1340, 1145, 948, 830, 769, 730  $\text{cm}^{-1}$ ;  $^1\text{H}$  NMR (400 MHz,  $\text{CDCl}_3$ ):  $\delta$  8.36 (s, 1H), 7.35 (dd,  $J = 8.2, 1.8$  Hz, 1H), 7.24–7.04 (m, 11H), 3.35 (s, 3H), 2.50 (s, 3H);  $^{13}\text{C}$  NMR (100 MHz,  $\text{CDCl}_3$ ):  $\delta$  162.7, 140.3, 136.7, 136.3, 135.2, 134.9, 133.5, 131.5, 130.0, 128.2, 128.1, 127.8, 127.4, 126.7, 125.3, 124.8, 118.8, 34.3, 21.4; HRMS [(ESI), (M+Na) $^+$ ]: 348.1361 (cal. for  $\text{C}_{23}\text{H}_{19}\text{NONa}$  348.1364); Registry Number: [1315257-16-9].

### 2-Methyl-3,4-diphenyl-7-(trifluoromethyl)isoquinolin-1(2H)-one (3d):

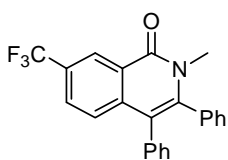

Work-up and purification by column chromatography, colorless solid (144 mg, 76%), mp: 199–200 °C; IR (KBr): 3054, 2924, 1727, 1652, 1553, 1496, 1409, 1313, 1117, 1070, 1008, 839, 703  $\text{cm}^{-1}$ ;  $^1\text{H}$  NMR (400 MHz,  $\text{CDCl}_3$ ):  $\delta$  8.85 (s, 1H), 7.70 (dd,  $J = 8.6, 2.0$  Hz, 1H), 7.29–7.03 (m, 10H), 6.84 (s, 1H), 3.37 (s, 3H);  $^{13}\text{C}$  NMR (100 MHz,  $\text{CDCl}_3$ ):  $\delta$  162.1, 143.6, 139.5, 135.1 (q,  $J_{\text{C-F}} = 90$  Hz), 131.4, 129.6, 128.7, 128.5, 128.3, 128.1, 128.0 (q,  $J_{\text{C-F}} = 3$  Hz), 127.2, 126.3, 125.8, 125.6 (q,  $J_{\text{C-F}} = 4$  Hz), 124.6, 123.4 (q,  $J_{\text{C-F}} = 272$  Hz), 118.3, 34.5; HRMS [(ESI), (M+Na) $^+$ ]: 402.1076 (cal. for  $\text{C}_{23}\text{H}_{16}\text{NOF}_3\text{Na}$  402.1082); Registry Number: [1315257-17-0].

### 2,6-Dimethyl-3,4-diphenylisoquinolin-1(2H)-one (3e):

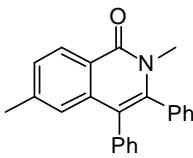

Work-up and purification by column chromatography, white solid (99 mg, 61%), mp: 230–231 °C; IR (KBr): 2980, 1665, 1278, 1107, 1039, 816, 721  $\text{cm}^{-1}$ ;  $^1\text{H}$  NMR (600 MHz,  $\text{CDCl}_3$ ):  $\delta$  8.45 (d,  $J = 8.1$  Hz, 1H), 7.32 (d,  $J = 8.1$  Hz, 1H), 7.26–7.14 (m, 6H), 7.12 (d,  $J = 7.2$  Hz, 2H), 7.06 (d,  $J = 7.2$  Hz, 2H), 6.93 (s, 1H), 3.34 (s, 3H), 2.34 (s, 3H);  $^{13}\text{C}$  NMR (150 MHz,  $\text{CDCl}_3$ ):  $\delta$  162.8, 142.5, 141.3, 137.2, 136.6, 135.2, 131.6, 129.9, 128.2, 128.1, 128.1, 127.9, 126.7, 125.0, 122.8, 118.7, 34.2, 21.0; HRMS [(ESI), (M+Na) $^+$ ]: 348.1358 (cal. for  $\text{C}_{23}\text{H}_{19}\text{NONa}$  348.1364); Registry Number: [1989524-19-7].



**6-Chloro-2-methyl-3,4-diphenylisoquinolin-1(2H)-one (3f):**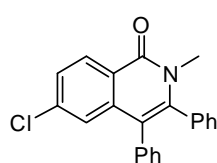

Work-up and purification by column chromatography, colorless solid (119 mg, 69%), mp: 266–267 °C; IR (KBr): 1649, 1597, 1443, 1416, 1360, 1190, 1070, 936, 869, 834, 784 cm<sup>-1</sup>; <sup>1</sup>H NMR (600 MHz, CDCl<sub>3</sub>): δ 8.48 (d, *J* = 8.4 Hz, 1H), 7.41 (d, *J* = 8.4 Hz, 1H), 7.28–7.00 (m, 10H), 6.91 (s, 1H), 3.37 (s, 3H); <sup>13</sup>C NMR (100 MHz, CDCl<sub>3</sub>): δ 152.1, 142.7, 138.7, 138.5, 135.7, 131.4, 129.8, 128.4, 128.3, 128.2, 128.1, 127.2, 127.1, 124.7, 123.3, 118.0, 34.4; HRMS [(EI), (M<sup>+</sup>)]: 345.0926 (cal. for C<sub>22</sub>H<sub>16</sub>ClNO 345.0920); Registry Number: [1315257-11-4].

**6,7-Dimethoxy-2-methyl-3,4-diphenylisoquinolin-1(2H)-one (3g):**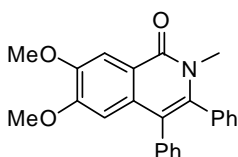

Work-up and purification by column chromatography, white solid (113 mg, 61%), mp: 240–242 °C; IR (KBr): 2954, 1645, 1604, 1483, 1415, 1230, 1143, 1072, 1001, 856, 781 cm<sup>-1</sup>; <sup>1</sup>H NMR (400 MHz, CDCl<sub>3</sub>): δ 7.93 (s, 1H), 7.26–7.04 (m, 10H), 6.50 (s, 1H), 4.03 (s, 3H), 3.68 (s, 3H), 3.35 (s, 3H); <sup>13</sup>C NMR (100 MHz, CDCl<sub>3</sub>): δ 162.0, 153.1, 149.1, 140.0, 136.4, 135.2, 132.6, 131.1, 130.1, 128.2, 128.1, 128.0, 126.8, 119.0, 118.6, 107.7, 105.7, 56.3, 55.7, 34.5; HRMS [(EI), (M<sup>+</sup>)]: 371.1520 (cal. for C<sub>24</sub>H<sub>21</sub>NO<sub>3</sub> 371.1521); Registry Number: [2101507-74-6].

**2,5-Dimethyl-3,4-diphenylisoquinolin-1(2H)-one (3h):**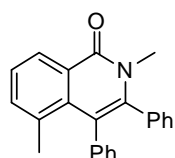

Work-up and purification by column chromatography, white solid (63 mg, 39%), mp: 200–201 °C; IR (KBr): 1644, 1495, 1337, 1142, 949, 834, 769, 733 cm<sup>-1</sup>; <sup>1</sup>H NMR (600 MHz, CDCl<sub>3</sub>): δ 8.55 (d, *J* = 7.8 Hz, 1H), 7.39 (t, *J* = 7.5 Hz, 1H), 7.36 (d, *J* = 7.2 Hz, 1H), 7.21–7.15 (m, 3H), 7.08–7.03 (m, 7H), 3.29 (s, 3H), 1.74 (s, 3H); <sup>13</sup>C NMR (150 MHz, CDCl<sub>3</sub>): δ 162.9, 141.9, 139.9, 136.3, 135.5, 135.0, 134.9, 132.0, 130.0, 128.0, 127.8, 127.3, 126.7, 126.5, 126.5, 126.3, 118.6, 34.3, 23.7; HRMS [(ESI), (M+Na)<sup>+</sup>]: 348.1361 (cal. for C<sub>23</sub>H<sub>19</sub>NONa 348.1364); New compound.

**2-Methyl-3,4-diphenyl-2,7-naphthyridin-1(2H)-one (3i):**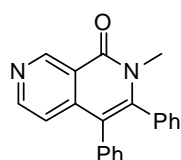

Work-up and purification by column chromatography, brown solid (83 mg, 53%), mp: 185–186 °C; IR (KBr): 1667, 1495, 1337, 1142, 1010, 940, 834, 769, 743 cm<sup>-1</sup>; <sup>1</sup>H NMR (400 MHz, CDCl<sub>3</sub>): δ 8.71–8.65 (m, 2H), 8.34 (d, *J* = 5.1 Hz, 1H), 7.29–7.21 (m, 6H), 7.16–7.09 (m, 4H), 3.39 (s, 3H); <sup>13</sup>C NMR (100 MHz, CDCl<sub>3</sub>): δ 161.5, 148.9, 145.6, 143.3, 134.5, 134.2, 131.6, 131.3, 129.8, 129.6, 128.7, 128.4, 128.2, 127.4, 120.0, 117.2, 34.7; HRMS [(ESI), (M+H)<sup>+</sup>]: 313.1335 (cal. for C<sub>21</sub>H<sub>17</sub>N<sub>2</sub>O 313.1341); New compound.

**6-Methyl-4,5-diphenylthieno[2,3-c]pyridin-7(6H)-one (3j):**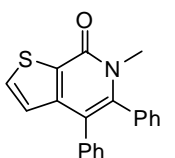

Work-up and purification by column chromatography, colorless oil (95 mg, 60%); IR (KBr): 3058, 1640, 1567, 1488, 1441, 789, 713 cm<sup>-1</sup>; <sup>1</sup>H NMR (400 MHz, CDCl<sub>3</sub>): δ 7.59 (d, *J* = 5.2 Hz, 1H), 7.27–7.05 (m, 10H), 6.92 (d, *J* = 5.2 Hz, 1H), 3.39 (s, 3H); <sup>13</sup>C NMR (100 MHz, CDCl<sub>3</sub>): δ 158.8, 145.6, 142.4, 136.8, 134.6, 132.7, 130.6, 130.1, 128.8, 128.4, 128.3, 127.9, 126.8, 124.7, 117.7, 34.2; HRMS [(ESI), (M+Na)<sup>+</sup>]: 340.0766 (cal. for C<sub>20</sub>H<sub>15</sub>NOSNa 340.0772); Registry Number: [1235479-02-3].

**3,4-Bis(4-methoxyphenyl)-2-methylisoquinolin-1(2H)-one (3k):**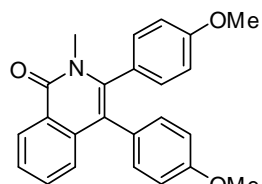

Work-up and purification by column chromatography, white solid (102 mg, 55%); mp: 224–225 °C; IR (KBr): 3502, 1698, 1329, 782 cm<sup>-1</sup>; <sup>1</sup>H NMR (600 MHz, CDCl<sub>3</sub>): δ 8.54 (d, *J* = 7.2 Hz, 1H), 7.52 (td, *J* = 7.2, 0.6 Hz, 1H), 7.47 (t, *J* = 7.8 Hz, 1H), 7.18 (d, *J* = 7.8 Hz, 1H), 7.03 (d, *J* = 8.7 Hz, 2H), 6.97 (d, *J* = 8.4 Hz, 2H), 6.77 (d, *J* = 7.8 Hz, 2H), 6.75 (d, *J* = 7.8 Hz, 2H), 3.76 (s, 6H), 3.35 (s, 3H); <sup>13</sup>C NMR (150 MHz, CDCl<sub>3</sub>): δ 162.8, 159.1, 158.2, 141.3, 137.5, 132.5, 131.9, 131.1, 128.9, 127.8, 127.6, 126.4, 125.3, 124.9, 118.7, 113.6, 113.4,

55.1, 55.0, 34.3; HRMS [(ESI), (M+Na)<sup>+</sup>]: 394.1414 (cal. for C<sub>24</sub>H<sub>21</sub>NO<sub>3</sub>Na 394.1419); Registry Number: [161730-00-3].

**3,4-Diethyl-2-methylisoquinolin-1(2H)-one (3l):**

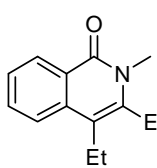

Work-up and purification by column chromatography, yellow oil (57 mg, 53%); IR (KBr): 1646, 1587, 1557, 1457, 1372, 1173, 1057, 898, 740 cm<sup>-1</sup>; <sup>1</sup>H NMR (400 MHz, CDCl<sub>3</sub>): δ 8.45 (dd, *J* = 7.6, 1.2 Hz, 1H), 7.63–7.61 (m, 2H), 7.41 (t, *J* = 7.6 Hz, 1H), 3.65 (s, 3H), 2.80–2.72 (m, 4H), 1.25–1.17 (m, 6H); <sup>13</sup>C NMR (100 MHz, CDCl<sub>3</sub>): δ 162.9, 140.7, 136.2, 132.0, 128.3, 125.6, 124.8, 122.4, 114.9, 31.1, 22.7, 20.5, 14.8, 13.5; HRMS [(ESI), (M+Na)<sup>+</sup>]: 238.1204 (cal. for C<sub>14</sub>H<sub>17</sub>NONa 238.1208); New compound.

**2-Methyl-3,4-dipropylisoquinolin-1(2H)-one (3m):**

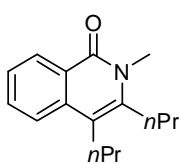

Work-up and purification by column chromatography, colorless solid (66 mg, 54%), mp: 72 °C; IR (KBr): 3274, 1644, 1587, 1591, 1555, 1448, 1333, 1173, 1057, 892, 776, 703 cm<sup>-1</sup>; <sup>1</sup>H NMR (400 MHz, CDCl<sub>3</sub>): δ 8.45 (dd, *J* = 8.0, 1.0 Hz, 1H), 7.62–7.61 (m, 2H), 7.42–7.38 (m, 1H), 3.65 (s, 3H), 2.73–2.67 (m, 4H), 1.66–1.54 (m, 4H), 1.06 (q, *J* = 6.8 Hz, 6H); <sup>13</sup>C NMR (100 MHz, CDCl<sub>3</sub>): δ 162.9, 139.8, 136.5, 131.9, 128.3, 125.5, 124.8, 122.6, 113.8, 31.8, 31.3, 29.8, 23.6, 22.6, 14.4, 14.2; HRMS [(ESI), (M+Na)<sup>+</sup>]: 266.1515 (cal. for C<sub>16</sub>H<sub>21</sub>NONa 266.1521); Registry Number: [1315257-19-2].

**3,4-Diethyl-6,7-dimethoxy-2-methylisoquinolin-1(2H)-one (3n):**

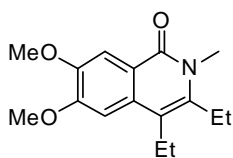

Work-up and purification by column chromatography, yellow oil (66 mg, 48%); IR (KBr): 2994, 1635, 1611, 1483, 1425, 1229, 1155, 1069, 1011, 876, 787 cm<sup>-1</sup>; <sup>1</sup>H NMR (400 MHz, CDCl<sub>3</sub>): δ 7.80 (s, 1H), 6.98 (s, 1H), 3.98 (s, 6H), 3.66 (s, 3H), 2.77 (q, *J* = 7.2 Hz, 4H), 1.26–1.20 (m, 6H); <sup>13</sup>C NMR (100 MHz, CDCl<sub>3</sub>): δ 162.1, 153.1, 148.3, 139.4, 131.7, 118.8, 114.5, 108.2, 102.9, 56.1, 56.0, 31.2, 22.7, 20.9, 14.7, 13.6; HRMS [(EI), (M<sup>+</sup>)]: 275.1521 (cal. for C<sub>16</sub>H<sub>21</sub>NO<sub>3</sub> 275.1521); New compound.

**6,7-Dimethoxy-2-methyl-3,4-dipropylisoquinolin-1(2H)-one (3o):**

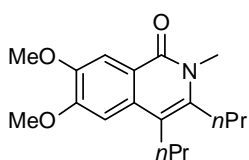

Work-up and purification by column chromatography, white solid (65 mg, 43%), mp: 93 °C; IR (KBr): 2974, 1645, 1617, 1411, 1217, 1143, 1072, 1001, 967, 856, 781 cm<sup>-1</sup>; <sup>1</sup>H NMR (400 MHz, CDCl<sub>3</sub>): δ 7.82 (s, 1H), 6.94 (s, 1H), 3.97 (s, 6H), 3.63 (s, 3H), 2.70–2.63 (m, 4H), 1.59 (sext, *J* = 7.2 Hz, 4H), 1.07–1.02 (m, 6H); <sup>13</sup>C NMR (100 MHz, CDCl<sub>3</sub>): δ 162.1, 153.1, 148.3, 138.6, 132.0, 118.8, 113.4, 108.1, 103.2, 56.1, 55.8, 31.8, 31.4, 30.1, 23.6, 22.7, 14.5, 14.3; HRMS [(EI), (M<sup>+</sup>)]: 303.1829 (cal. for C<sub>18</sub>H<sub>25</sub>NO<sub>3</sub> 303.1834); New compound.

**6-Chloro-2-methyl-3,4-dipropylisoquinolin-1(2H)-one (3p):**

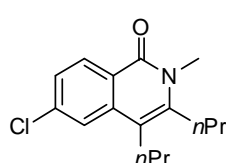

Work-up and purification by column chromatography, white solid (82 mg, 59%), mp: 88 °C; IR (KBr): 3283, 1653, 1547, 1451, 1257, 1340, 1197, 1075, 939, 868 cm<sup>-1</sup>; <sup>1</sup>H NMR (400 MHz, CDCl<sub>3</sub>): δ 8.37 (d, *J* = 8.6 Hz, 1H), 7.57 (d, *J* = 1.9 Hz, 1H), 7.35 (dd, *J* = 8.6, 1.8 Hz, 1H), 3.64 (s, 3H), 2.73–2.62 (m, 4H), 1.67–1.53 (m, 4H), 1.08 (q, *J* = 7.0 Hz, 6H); <sup>13</sup>C NMR (100 MHz, CDCl<sub>3</sub>): δ 162.4, 141.5, 138.6, 137.9, 130.2, 126.1, 123.1, 122.2, 113.1, 31.9, 31.4, 29.8, 23.6, 22.5, 14.4, 14.3; HRMS [(ESI), (M+Na)<sup>+</sup>]: 300.1132 (cal. for C<sub>16</sub>H<sub>20</sub>ClNONa 300.1131); New compound.

**3,4-Diethyl-2-methyl-7-(trifluoromethyl)isoquinolin-1(2H)-one (3q):**

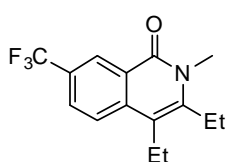

Work-up and purification by column chromatography, white solid (89 mg, 63%), mp: 82–83 °C; IR (KBr): 2953, 1648, 1604, 1483, 1315, 1230, 1110, 1072, 1001, 855, 777 cm<sup>-1</sup>; <sup>1</sup>H NMR (400 MHz, CDCl<sub>3</sub>): δ 8.73 (s, 1H), 7.81–7.73 (m, 2H), 3.68 (s, 3H), 2.85–2.75 (m, 4H), 1.29–1.20 (m, 6H); <sup>13</sup>C NMR (100 MHz, CDCl<sub>3</sub>): δ 162.3, 143.5, 138.7, 127.9 (q, *J*<sub>C-F</sub> = 3 Hz), 127.4 (q, *J*<sub>C-F</sub> = 33 Hz),

126.1 (q,  $J_{C-F} = 4$  Hz), 124.5, 124.1 (q,  $J_{C-F} = 270$  Hz), 123.4, 114.5, 31.3, 22.9, 20.6, 14.7, 13.4; HRMS [(ESI), (M+H)<sup>+</sup>]: 284.1264 (cal. for C<sub>15</sub>H<sub>17</sub>F<sub>3</sub>NO 284.1262); New compound.

### 2,3,4-Triphenylisoquinolin-1(2H)-one (3r):

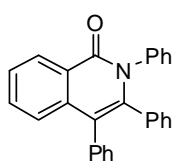

Work-up and purification by column chromatography, white solid (86 mg, 46%), mp: 202–203 °C; IR (KBr): 3013, 1951, 1652, 1613, 1588, 1489, 1422, 1327, 1257, 1120, 1029, 922, 803, 767 cm<sup>-1</sup>; <sup>1</sup>H NMR (400 MHz, CDCl<sub>3</sub>): δ 8.58 (d,  $J = 7.5$  Hz, 1H), 7.60 (t,  $J = 7.2$  Hz, 1H), 7.54 (t,  $J = 7.2$  Hz, 1H), 7.28–7.11 (m, 11H), 6.90 (br, 5H); <sup>13</sup>C NMR (100 MHz, CDCl<sub>3</sub>): δ 162.7, 141.1, 139.5, 137.7, 136.4, 134.8, 132.6, 131.6, 131.1, 129.5, 128.6, 128.3, 128.0, 127.6, 127.3, 127.1, 126.9, 126.8, 125.6, 125.5, 118.9; HRMS [(ESI), (M+Na)<sup>+</sup>]: 396.1358 (cal. for C<sub>27</sub>H<sub>19</sub>NONa 396.1364); Registry Number: [14959-72-9].

### 2-(4-Fluorophenyl)-3,4-diphenylisoquinolin-1(2H)-one (3s):

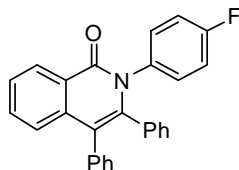

Work-up and purification by column chromatography, white solid (123 mg, 63%), mp: 238–239 °C; IR (KBr): 1899, 1661, 1587, 1554, 1442, 1328, 1227, 1090, 1012, 923, 854, 784, 747 cm<sup>-1</sup>; <sup>1</sup>H NMR (400 MHz, CDCl<sub>3</sub>): δ 8.58 (d,  $J = 10.6$  Hz, 1H), 7.62–7.53 (m, 2H), 7.30–7.08 (m, 8H), 6.95–6.90 (m, 7H); <sup>13</sup>C NMR (100 MHz, CDCl<sub>3</sub>): δ 162.7, 139.3 (d,  $J_{C-F} = 234$  Hz), 137.6, 136.2, 134.6, 132.6, 131.5, 131.2, 131.1, 131.0, 130.9, 128.2, 128.0, 127.4, 127.3, 127.0, 126.9, 125.7, 125.4, 119.0, 115.6 (d,  $J_{C-F} = 30$  Hz); HRMS [(ESI), (M+Na)<sup>+</sup>]: 414.1263 (cal. for C<sub>27</sub>H<sub>18</sub>FNONa 414.1270); Registry Number: [1253388-48-5].

### 2-(Furan-2-ylmethyl)-3,4-diphenylisoquinolin-1(2H)-one (3t):

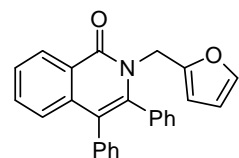

Work-up and purification by column chromatography, brown solid (108 mg, 57%), mp: 152–153 °C; IR (KBr): 1950, 1656, 1606, 1557, 1486, 1422, 1324, 1008, 748 cm<sup>-1</sup>; <sup>1</sup>H NMR (400 MHz, CDCl<sub>3</sub>): δ 8.59 (s, 1H), 7.56–7.48 (m, 2H), 7.25–7.06 (m, 12H), 6.25–6.23 (m, 1H), 6.06 (dd,  $J = 3.2, 0.6$  Hz, 1H), 5.13 (s, 2H); <sup>13</sup>C NMR (100 MHz, CDCl<sub>3</sub>): δ 162.3, 150.5, 141.5, 140.9, 137.3, 136.4, 134.2, 132.3, 131.5, 130.5, 128.3, 128.1, 127.9, 127.8, 126.8, 126.7, 125.4, 125.1, 119.4, 110.3, 108.2, 42.6; HRMS [(EI), (M<sup>+</sup>)]: 377.1412 (cal. for C<sub>26</sub>H<sub>19</sub>NO<sub>2</sub> 377.1416); New compound.

### 2,4-Dimethyl-3-phenylisoquinolin-1(2H)-one (3u):

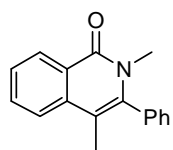

Work-up and purification by column chromatography, yellow solid (54 mg, 43%), mp: 104–105 °C; IR (KBr): 2978, 1644, 1641, 1283, 1085, 762, 709 cm<sup>-1</sup>; <sup>1</sup>H NMR (400 MHz, CDCl<sub>3</sub>): δ 8.54 (d,  $J = 8.4$  Hz, 1H), 7.70–7.69 (m, 2H), 7.53–7.46 (m, 4H), 7.28–7.26 (m, 2H), 3.26 (s, 3H), 2.02 (s, 3H); <sup>13</sup>C NMR (100 MHz, CDCl<sub>3</sub>): δ 162.6, 140.2, 137.1, 135.8, 132.1, 129.4, 129.0, 128.7, 128.1, 126.4, 125.2, 123.2, 110.4, 34.2, 14.8; HRMS [(EI), (M<sup>+</sup>)]: 249.1142 (cal. for C<sub>17</sub>H<sub>15</sub>NO 249.1154); Registry Number: [51089-64-6]. For this stereoisomer, spectral data matches the reported literature.<sup>2</sup> NOE data was not collected.

### 4-Ethyl-2-methyl-3-phenylisoquinolin-1(2H)-one (3v):

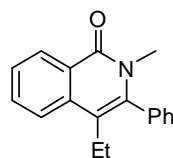

Work-up and purification by column chromatography, pale yellow solid (53 mg, 40%), mp: 144 °C; IR (KBr): 2968, 1648, 1613, 1487, 1333, 1055, 762, 703 cm<sup>-1</sup>; <sup>1</sup>H NMR (400 MHz, CDCl<sub>3</sub>): δ 8.56 (d,  $J = 8.0$  Hz, 1H), 7.72–7.70 (m, 2H), 7.53–7.48 (m, 4H), 7.30–7.26 (m, 2H), 3.23 (s, 3H), 2.44 (q,  $J = 7.2$  Hz, 2H), 1.05 (t,  $J = 7.2$  Hz, 3H); <sup>13</sup>C NMR (100 MHz, CDCl<sub>3</sub>): δ 162.4, 140.1, 136.0, 135.6, 132.0, 129.1, 129.0, 128.7, 128.4, 126.3, 125.7, 123.1, 116.6, 34.0, 21.6, 14.8; HRMS [(ESI), (M+Na)<sup>+</sup>]: 286.1206 (cal. for C<sub>18</sub>H<sub>17</sub>NONa 286.1208); Registry Number: [1235479-12-5]. For this stereoisomer, spectral data matches the reported literature.<sup>2</sup> NOE data was not collected.

**2-Methyl-3-phenyl-4-(trimethylsilyl)isoquinolin-1(2H)-one (3w):**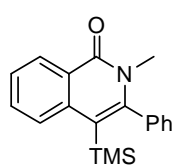

Work-up and purification by column chromatography, white solid (80 mg, 52%), mp: 174–175 °C; IR (KBr): 3275, 1645, 1328, 928, 524 cm<sup>-1</sup>; <sup>1</sup>H NMR (600 MHz, CDCl<sub>3</sub>): δ 8.53 (d, *J* = 8.1 Hz, 1H), 7.88 (d, *J* = 8.1 Hz, 1H), 7.63 (t, *J* = 7.8 Hz, 1H), 7.49–7.47 (m, 4H), 7.30–7.30 (m, 2H), 3.19 (s, 3H), -0.04 (s, 9H); <sup>13</sup>C NMR (150 MHz, CDCl<sub>3</sub>): δ 163.1, 148.7, 139.6, 137.7, 131.1, 130.2, 129.2, 128.6, 128.2, 127.2, 125.9, 125.6, 111.7, 34.0, 2.0; HRMS [(ESI), (M+H)<sup>+</sup>]: 308.1473 (cal. for C<sub>19</sub>H<sub>22</sub>NOSi 308.1471); New compound.

**2,6-Dimethyl-3-phenyl-4-(trimethylsilyl)isoquinolin-1(2H)-one (3x):**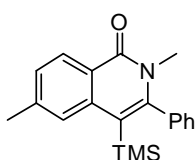

Work-up and purification by column chromatography, white solid (74 mg, 46%), mp: 134–135 °C; IR (KBr): 3726, 2958, 1650, 885 cm<sup>-1</sup>; <sup>1</sup>H NMR (600 MHz, CDCl<sub>3</sub>): δ 8.41 (d, *J* = 8.1 Hz, 1H), 7.64 (s, 1H), 7.47–7.46 (m, 3H), 7.31–7.28 (m, 3H), 3.17 (s, 3H), 2.50 (s, 3H), -0.04 (s, 9H); <sup>13</sup>C NMR (150 MHz, CDCl<sub>3</sub>): δ 163.1, 148.8, 141.4, 139.7, 137.8, 130.2, 129.1, 128.6, 128.2, 127.5, 127.2, 123.3, 111.4, 33.9, 22.1, 2.1; HRMS [(ESI), (M+H)<sup>+</sup>]: 322.1631 (cal. for C<sub>20</sub>H<sub>24</sub>NOSi 322.1627); New compound.

**NOE data:**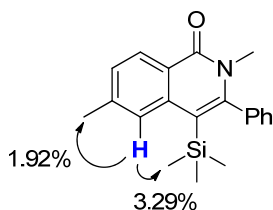**(E)-2-(1,2-Diphenylvinyl)-N-methylbenzamide (4a):**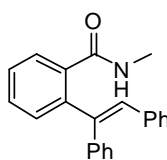

Work-up and purification by column chromatography, yellow solid (118 mg, 75%), mp: 132–133 °C; IR (KBr): 3449, 1625, 1312, 764, 517 cm<sup>-1</sup>; <sup>1</sup>H NMR (600 MHz, CDCl<sub>3</sub>): δ 7.51 (d, *J* = 7.8 Hz, 1H), 7.44–7.39 (m, 2H), 7.36 (t, *J* = 7.2 Hz, 1H), 7.22–7.10 (m, 10H), 6.79 (s, 1H), 2.61 (d, *J* = 4.8 Hz, 3H); <sup>13</sup>C NMR (150 MHz, CDCl<sub>3</sub>): δ 170.0, 142.2, 141.9, 139.4, 137.1, 136.5, 130.9, 130.6, 130.4, 129.9, 129.4, 128.3, 128.1, 128.0, 127.8, 127.6, 127.1, 26.6; HRMS [(EI), (M<sup>+</sup>)]: 313.1462 (cal. for C<sub>22</sub>H<sub>19</sub>NO 313.1467); Registry Number: [1315257-10-3].

**(E)-2-(1,2-Diphenylvinyl)-5-methoxy-N-methylbenzamide (4b):**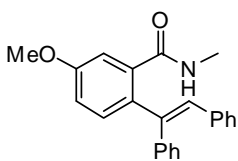

Work-up and purification by column chromatography, white solid (113 mg, 66%), mp: 214–215 °C; IR (KBr): 3280, 1645, 1612, 1589, 1526, 1350, 1261, 1134, 1052, 961, 866, 728 cm<sup>-1</sup>; <sup>1</sup>H NMR (600 MHz, CDCl<sub>3</sub>): δ 7.31 (d, *J* = 8.4 Hz, 1H), 7.21–7.08 (m, 11H), 6.95 (dd, *J* = 8.4, 2.7 Hz, 1H), 6.76 (s, 1H), 3.83 (s, 3H), 2.6 (d, *J* = 4.8 Hz, 3H); <sup>13</sup>C NMR (150 MHz, CDCl<sub>3</sub>): δ 169.6, 159.2, 141.5, 139.6, 137.5, 137.2, 134.5, 132.3, 130.3, 130.0, 129.4, 128.1, 128.0, 127.6, 127.0, 116.0, 113.2, 55.5, 26.6; HRMS [(ESI), (M+H)<sup>+</sup>]: 344.1650 (cal. for C<sub>23</sub>H<sub>22</sub>NO<sub>2</sub> 344.1651); New compound.

**(E)-2-(1,2-Diphenylvinyl)-4,5-dimethoxy-N-methylbenzamide (4c):**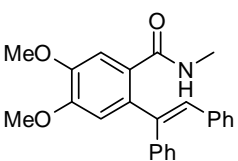

Work-up and purification by column chromatography, yellow solid (121 mg, 65%), mp: 228–230 °C; IR (KBr): 3262, 1633, 1316, 761, 565 cm<sup>-1</sup>; <sup>1</sup>H NMR (600 MHz, CDCl<sub>3</sub>): δ 7.21–7.09 (m, 11H), 6.85 (s, 1H), 6.79 (s, 1H), 3.92 (s, 3H), 3.90 (s, 3H), 2.62 (d, *J* = 4.8 Hz, 3H); <sup>13</sup>C NMR (150 MHz, CDCl<sub>3</sub>): δ 169.3, 149.9, 148.4, 142.0, 139.2, 136.9, 135.2, 130.3, 130.1, 129.3, 128.5, 128.1, 127.8, 127.2, 113.8, 111.8, 56.1, 56.0, 26.7; HRMS [(ESI), (M+H)<sup>+</sup>]: 374.1757 (cal. for C<sub>24</sub>H<sub>24</sub>NO<sub>3</sub> 374.1756); New compound.

**(E)-2-(1,2-Diphenylvinyl)-N,4-dimethylbenzamide (4d):**

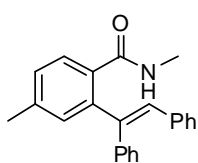

Work-up and purification by column chromatography, white solid (105 mg, 64%), mp: 154–155 °C; IR (KBr): 3283, 1622, 1309, 831, 696 cm<sup>-1</sup>; <sup>1</sup>H NMR (600 MHz, CDCl<sub>3</sub>): δ 7.44 (d, *J* = 7.8 Hz, 1H), 7.21–7.12 (m, 12H), 6.78 (s, 1H), 2.61 (d, *J* = 4.8 Hz, 3H), 2.39 (s, 3H); <sup>13</sup>C NMR (150 MHz, CDCl<sub>3</sub>): δ 169.9, 142.1, 142.1, 139.9, 139.4, 137.1, 133.6, 131.5, 130.3, 129.4, 128.5, 128.4, 128.1, 127.5, 127.1, 26.6, 21.3; HRMS [(ESI), (M+H)<sup>+</sup>]: 328.1703 (cal. for C<sub>23</sub>H<sub>22</sub>NO 328.1701); Registry Number: [1427042-11-2].

**(E)-2-(1,2-Diphenylvinyl)-N,3-dimethylbenzamide (4e):**

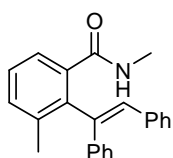

Work-up and purification by column chromatography, white solid (93 mg, 57%), mp: 157–158 °C; IR (KBr): 1702, 1516, 1328, 1122, 936, 836, 762, 730 cm<sup>-1</sup>; <sup>1</sup>H NMR (600 MHz, CDCl<sub>3</sub>): δ 7.43 (d, *J* = 7.2 Hz, 1H), 7.31–7.21 (m, 2H), 7.21 (br, 5H), 7.18 (br, 5H), 6.63 (s, 1H), 2.76 (d, *J* = 4.8 Hz, 3H), 2.27 (s, 3H); <sup>13</sup>C NMR (150 MHz, CDCl<sub>3</sub>): δ 170.4, 140.9, 140.1, 138.8, 137.3, 137.1, 131.9, 130.8, 130.0, 129.2, 128.2, 128.1, 127.4, 127.3, 127.1, 125.5, 26.7, 20.5; HRMS [(ESI), (M+H)<sup>+</sup>]: 328.1702 (cal. for C<sub>23</sub>H<sub>22</sub>NO 328.1701); New compound.

**(E)-4-Chloro-2-(1,2-diphenylvinyl)-N-methylbenzamide (4f):**

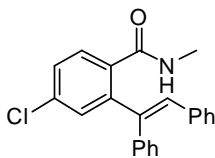

Work-up and purification by column chromatography, pale yellow solid (117 mg, 67%), mp: 177–178 °C; IR (KBr): 3302, 1626, 1307, 952, 712, 564 cm<sup>-1</sup>; <sup>1</sup>H NMR (600 MHz, CDCl<sub>3</sub>): δ 7.46 (d, *J* = 8.1 Hz, 1H), 7.40 (s, 1H), 7.33 (d, *J* = 8.1 Hz, 1H), 7.23–7.10 (m, 10H), 6.79 (s, 1H), 2.60 (d, *J* = 4.8 Hz, 3H); <sup>13</sup>C NMR (150 MHz, CDCl<sub>3</sub>): δ 169.0, 144.0, 140.7, 138.7, 136.6, 135.7, 134.9, 131.4, 130.7, 130.3, 129.8, 129.4, 128.2, 128.1, 127.9, 127.8, 127.4, 26.6; HRMS [(ESI), (M+H)<sup>+</sup>]: 348.1158 (cal. for C<sub>22</sub>H<sub>19</sub>NOCl 348.1155); New compound.

**(E)-2-(1,2-diphenylvinyl)-N-methyl-5-(trifluoromethyl)benzamide (4g):**

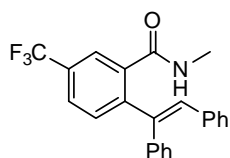

Work-up and purification by column chromatography, white solid (130 mg, 68%), mp: 158–159 °C; IR (KBr): 3279, 1648, 1341, 774 cm<sup>-1</sup>; <sup>1</sup>H NMR (600 MHz, C<sub>6</sub>D<sub>6</sub>): δ 7.57 (s, 1H), 7.29 (d, *J* = 8.4 Hz, 1H), 7.18–7.10 (m, 4H), 7.04 (d, *J* = 7.8 Hz, 1H), 6.99–6.92 (m, 6H), 6.64 (s, 1H), 4.74 (br, 1H), 2.20 (d, *J* = 4.8 Hz, 3H); <sup>13</sup>C NMR (75 MHz, CDCl<sub>3</sub>): δ 168.5, 140.5, 145.7, 138.7, 137.1, 136.4, 131.7, 131.3, 131.3, 130.3, 129.8 (q, *J*<sub>C-F</sub> = 33 Hz), 129.4, 128.2, 128.1, 127.9, 127.5, 126.4 (q, *J*<sub>C-F</sub> = 4 Hz), 125.3 (q, *J*<sub>C-F</sub> = 4 Hz), 120 (q, *J*<sub>C-F</sub> = 271 Hz), 26.6; HRMS [(ESI), (M+Na)<sup>+</sup>]: 404.1238 (cal. for C<sub>23</sub>H<sub>18</sub>F<sub>3</sub>NONa 404.1238); New compound.

**(E)-3-(1,2-Diphenylvinyl)-N-methylthiophene-2-carboxamide (4h):**

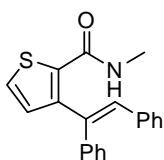

Work-up and purification by column chromatography, white solid (107 mg, 67%), mp: 170–171 °C; IR (KBr): 3445, 1698, 1339, 749 cm<sup>-1</sup>; <sup>1</sup>H NMR (600 MHz, CDCl<sub>3</sub>): δ 7.35 (dd, *J* = 4.8, 1.8 Hz, 1H), 7.27–7.26 (m, 4H), 7.20–7.19 (m, 4H), 7.16–7.15 (m, 2H), 6.88–6.87 (m, 2H), 6.44 (s, 1H), 2.76 (d, *J* = 4.8 Hz, 3H); <sup>13</sup>C NMR (150 MHz, CDCl<sub>3</sub>): δ 162.9, 143.7, 138.6, 136.5, 136.0, 135.6, 132.2, 130.8, 129.5, 129.3, 128.6, 128.3, 128.1, 128.0, 127.7, 26.5; HRMS [(ESI), (M+Na)<sup>+</sup>]: 342.0925 (cal. for C<sub>20</sub>H<sub>17</sub>NOSNa 342.0928); Registry Number: [1315257-18-1].

**(E)-2-(But-2-en-2-yl)-N-methylbenzamide (4i):**

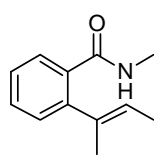

Work-up and purification by column chromatography, colorless liquid, (47 mg, 50%); IR (KBr): 3446, 1698, 1540, 740 cm<sup>-1</sup>; <sup>1</sup>H NMR (600 MHz, CDCl<sub>3</sub>): δ 7.61 (d, *J* = 7.8 Hz, 1H), 7.33 (t, *J* = 7.8 Hz, 1H), 7.26 (t, *J* = 7.8 Hz, 1H), 7.13 (d, *J* = 7.8 Hz, 1H), 6.11 (s, 1H), 5.60 (q, *J* = 6.6 Hz, 1H), 2.92 (d, *J* = 4.8 Hz, 3H), 1.91 (s, 3H), 1.77 (d, *J* = 6.6 Hz, 3H); <sup>13</sup>C NMR (150 MHz, CDCl<sub>3</sub>): δ 170.1, 143.5, 137.3, 134.1, 130.1,

129.2, 128.5, 126.9, 125.1, 26.8, 17.7, 14.1; HRMS [(ESI), (M+Na)<sup>+</sup>]: 212.1052 (cal. for C<sub>12</sub>H<sub>15</sub>NONa 212.1051); New compound.

**(E)-2-(Hex-3-en-3-yl)-N-methylbenzamide (4j):**

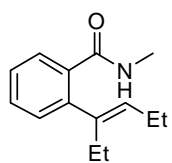

Work-up and purification by column chromatography, colorless liquid, (59 mg, 54%); IR (KBr): 3421, 1646, 1540, 750 cm<sup>-1</sup>; <sup>1</sup>H NMR (600 MHz, CDCl<sub>3</sub>): δ 7.70 (dd, *J* = 7.8, 1.8 Hz, 1H), 7.34 (td, *J* = 7.8, 1.8 Hz, 1H), 7.29 (t, *J* = 7.8, 1.2 Hz, 1H), 7.12 (d, *J* = 7.2 Hz, 1H), 6.24 (s, 1H), 5.47 (t, *J* = 7.8 Hz, 1H), 2.91 (d, *J* = 5.4 Hz, 3H), 2.34 (q, *J* = 7.2 Hz, 2H), 2.20 (quint, *J* = 7.2 Hz, 2H), 1.05 (t, *J* = 7.8 Hz, 3H), 0.84 (t, *J* = 7.8 Hz, 3H); <sup>13</sup>C NMR (150 MHz, CDCl<sub>3</sub>): δ 169.8, 142.8, 141.8, 134.0, 132.1, 130.1, 130.0, 128.8, 127.1, 26.6, 25.0, 21.4, 14.4, 13.0; HRMS [(ESI), (M+Na)<sup>+</sup>]: 240.1373 (cal. for C<sub>14</sub>H<sub>19</sub>NONa 240.1364); New compound.

**(E)-N-Methyl-2-(oct-4-en-4-yl)benzamide (4k):**

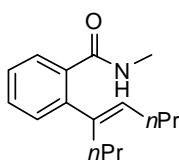

Work-up and purification by column chromatography, colorless liquid, (65 mg, 53%); IR (KBr): 3420, 1646, 1540, 750 cm<sup>-1</sup>; <sup>1</sup>H NMR (600 MHz, CDCl<sub>3</sub>): δ 7.69 (dd, *J* = 7.8, 1.2 Hz, 1H), 7.33 (td, *J* = 7.2, 1.2 Hz, 1H), 7.28 (td, *J* = 7.8, 1.2 Hz, 1H), 7.11 (d, *J* = 7.8 Hz, 1H), 6.27 (s, 1H), 5.51 (t, *J* = 7.2 Hz, 1H), 2.90 (d, *J* = 1.2 Hz, 3H), 2.29 (t, *J* = 7.8 Hz, 2H), 2.18 (q, *J* = 7.2 Hz, 2H), 1.46 (sext, *J* = 7.2 Hz, 2H), 1.22 (sext, *J* = 7.8 Hz, 2H), 0.97 (t, *J* = 7.8 Hz, 3H), 0.81 (t, *J* = 7.8 Hz, 3H); <sup>13</sup>C NMR (150 MHz, CDCl<sub>3</sub>): δ 169.7, 142.3, 142.1, 133.9, 131.3, 130.1, 130.0, 128.8, 127.0, 34.0, 30.3, 26.6, 22.9, 21.5, 13.9, 13.8; HRMS [(ESI), (M+Na)<sup>+</sup>]: 268.1678 (cal. for C<sub>16</sub>H<sub>23</sub>NONa 268.1677); Registry Number: [1427042-15-6].

**(E)-2-(1,2-Bis(4-fluorophenyl)vinyl)-N-methylbenzamide (4l):**

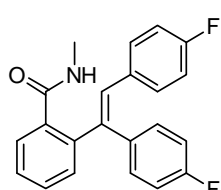

Work-up and purification by column chromatography, white solid (112 mg, 64%), mp: 139–140 °C; IR (KBr): 3446, 1683, 1457, 1262, 746 cm<sup>-1</sup>; <sup>1</sup>H NMR (600 MHz, CDCl<sub>3</sub>): δ 7.46 (d, *J* = 7.8 Hz, 1H), 7.43 (t, *J* = 7.8 Hz, 1H), 7.39–7.34 (m, 2H), 7.09–7.05 (m, 4H), 6.91 (t, *J* = 8.4 Hz, 2H), 6.87 (t, *J* = 8.4 Hz, 2H), 6.73 (s, 1H), 5.59 (s, 1H), 2.63 (d, *J* = 4.8 Hz, 3H); <sup>13</sup>C NMR (150 MHz, CDCl<sub>3</sub>): δ 169.9, 162.7 (d, *J*<sub>C-F</sub> = 247 Hz), 161.8 (d, *J*<sub>C-F</sub> = 246 Hz), 141.9, 140.8, 136.6, 135.2 (d, *J*<sub>C-F</sub> = 3 Hz), 133.0 (d, *J*<sub>C-F</sub> = 3 Hz), 132.2 (d, *J*<sub>C-F</sub> = 8 Hz), 131 (d, *J*<sub>C-F</sub> = 8 Hz), 130.7, 129.9, 129.2, 128 (d, *J*<sub>C-F</sub> = 9 Hz), 115.1 (*J*<sub>C-F</sub> = 21 Hz), 115.1 (d, *J*<sub>C-F</sub> = 21 Hz), 26.5; HRMS [(ESI), (M+Na)<sup>+</sup>]: 372.1172 (cal. for C<sub>22</sub>H<sub>17</sub>F<sub>2</sub>NONa 372.1175); New compound.

**(E)-2-(1,2-Bis(4-(trifluoromethyl)phenyl)vinyl)-N-methylbenzamide (4m):**

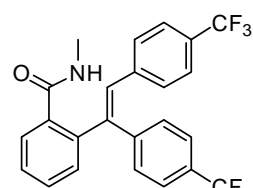

Work-up and purification by column chromatography, colorless liquid, (153 mg, 68%); IR (KBr): 3445, 1698, 1324, 749 cm<sup>-1</sup>; <sup>1</sup>H NMR (600 MHz, CDCl<sub>3</sub>): δ 7.47–7.36 (m, 8H), 7.26–7.24 (m, 2H), 7.17 (d, *J* = 8.4 Hz, 2H), 6.86 (s, 1H), 5.55 (s, 1H), 2.58 (d, *J* = 4.8 Hz, 3H); <sup>13</sup>C NMR (150 MHz, CDCl<sub>3</sub>): δ 169.7, 142.9, 142.7, 141.3, 140.1, 136.8, 130.9, 130.8, 130.1, 129.8, 129.6, 129.1 (q, *J*<sub>C-F</sub> = 32 Hz), 128.3, 127.6, 125.2, 125.1, 125.0, 125.0, 124.0 (q, *J*<sub>C-F</sub> = 270 Hz), 123.9 (q, *J*<sub>C-F</sub> = 270 Hz), 26.4; HRMS [(ESI), (M+Na)<sup>+</sup>]: 472.1110 (cal. for C<sub>24</sub>H<sub>17</sub>F<sub>6</sub>NONa 472.1112); New compound.

**(E)-2-(1,2-Bis(4-methoxyphenyl)vinyl)-N-methylbenzamide (4n):**

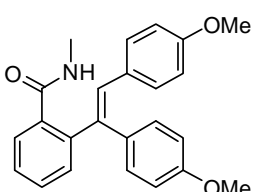

Work-up and purification by column chromatography, white solid (117 mg, 63%), mp: 231–232 °C; IR (KBr): 3310, 1645, 1540, 757 cm<sup>-1</sup>; <sup>1</sup>H NMR (600 MHz, CDCl<sub>3</sub>): δ 7.52 (d, *J* = 7.8 Hz, 1H), 7.41–7.31 (m, 3H), 7.08 (d, *J* = 8.4 Hz, 2H), 7.04 (d, *J* = 8.4 Hz, 2H), 6.74 (d, *J* = 8.4 Hz, 2H), 6.71 (d, *J* = 8.4 Hz, 2H), 6.65 (s, 1H), 5.82 (s, 1H), 3.76 (s, 6H), 2.62 (d, *J* = 4.8 Hz, 3H); <sup>13</sup>C NMR (150 MHz, CDCl<sub>3</sub>): δ 169.9, 158.8, 158.5, 142.6, 139.7, 136.3, 131.9, 131.5, 130.8, 130.5, 129.8, 129.7, 129.3, 128.4, 127.5, 113.5, 113.4, 55.1, 55.0, 26.6; HRMS

[(ESI), (M+Na)<sup>+</sup>]: 396.1568 (cal. for C<sub>24</sub>H<sub>23</sub>NO<sub>3</sub>Na 396.1575); Registry Number: [1427042-13-4].

**(E)-2-(1,2-Di-*m*-tolylvinyl)-*N*-methylbenzamide (4o):**

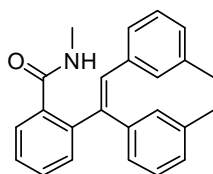

Work-up and purification by column chromatography, yellow solid (107 mg, 63%), mp: 118–119 °C; IR (KBr): 3445, 1646, 1540, 744 cm<sup>-1</sup>; <sup>1</sup>H NMR (600 MHz, CDCl<sub>3</sub>): δ 7.55 (d, *J* = 7.8 Hz, 1H), 7.43–7.40 (m, 1H), 7.37–7.34 (m, 2H), 7.10 (t, *J* = 7.8 Hz, 1H), 7.04 (t, *J* = 7.8 Hz, 2H), 6.97 (d, *J* = 7.2 Hz, 2H), 6.93–6.89 (m, 3H), 6.72 (s, 1H), 5.74 (s, 1H), 2.65 (d, *J* = 5.4 Hz, 3H), 2.22 (d, *J* = 3.6 Hz, 6H); <sup>13</sup>C NMR (150 MHz, CDCl<sub>3</sub>): δ 169.9, 142.3, 141.7, 139.4, 137.6, 137.5, 136.9, 136.3, 130.8, 130.7, 130.6, 130.3, 129.8, 128.4, 128.3, 127.9, 127.9, 127.8, 127.7, 127.4, 126.3, 26.6, 21.3; HRMS [(ESI), (M+Na)<sup>+</sup>]: 364.1671 (cal. for C<sub>24</sub>H<sub>23</sub>NONa 364.1677); New compound.

**((Z)-2-(1,2-Di(thiophen-2-yl)vinyl)-*N*-methylbenzamide (4p):**

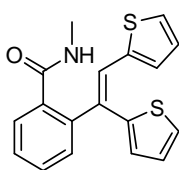

Work-up and purification by column chromatography, white solid (96 mg, 59%), mp: 227–228 °C; IR (KBr): 3556, 1652, 1540, 744 cm<sup>-1</sup>; <sup>1</sup>H NMR (600 MHz, CDCl<sub>3</sub>): δ 7.51 (d, *J* = 7.8 Hz, 1H), 7.41–7.37 (m, 3H), 7.35–7.33 (m, 1H), 7.17 (d, *J* = 4.8 Hz, 1H), 7.09 (d, *J* = 3.6 Hz, 1H), 7.05 (d, *J* = 3.6 Hz, 1H), 7.04–7.03 (m, 1H), 6.95 (s, 1H), 6.93 (t, *J* = 4.8 Hz, 1H), 5.77 (s, 1H), 2.78 (d, *J* = 5.4 Hz, 3H); <sup>13</sup>C NMR (150 MHz, CDCl<sub>3</sub>): δ 170.1, 140.9, 140.3, 139.6, 136.3, 132.2, 129.9, 129.8, 129.3, 128.3, 127.9, 127.5, 127.1, 126.6, 126.5, 126.1, 26.8; HRMS [(ESI), (M+Na)<sup>+</sup>]: 348.0491 (cal. for C<sub>18</sub>H<sub>15</sub>NOS<sub>2</sub>Na 348.0492); New compound.

**(E)-4-Chloro-2-(hex-3-en-3-yl)-*N*-methylbenzamide (4q):**

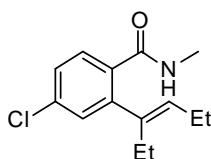

Work-up and purification by column chromatography, white solid (70 mg, 56%), mp: 181–182 °C; IR (KBr): 3283, 1653, 1547, 1451, 1257, 1340, 1197, 1075, 939, 868 cm<sup>-1</sup>; <sup>1</sup>H NMR (400 MHz, CDCl<sub>3</sub>): δ 7.65 (d, *J* = 8.4 Hz, 1H), 7.36 (dd, *J* = 8.4, 2.1 Hz, 1H), 7.12 (d, *J* = 2.1 Hz, 1H), 5.50 (t, *J* = 7.5 Hz, 1H), 2.90 (d, *J* = 4.8 Hz, 3H), 2.32 (q, *J* = 7.5 Hz, 2H), 2.20 (quint, *J* = 7.5 Hz, 2H), 1.05 (t, *J* = 7.5 Hz, 3H), 0.85 (t, *J* = 7.5 Hz, 3H); <sup>13</sup>C NMR (100 MHz, CDCl<sub>3</sub>): δ 168.7, 143.5, 141.8, 135.8, 133.0, 132.3, 130.4, 130.0, 127.2, 26.7, 24.8, 21.4, 14.3, 13.0; HRMS [(EI), (M<sup>+</sup>)]: 251.1075 (cal. for C<sub>14</sub>H<sub>18</sub>NOCl 251.1077); New compound.

**(E)-2-(1,2-Bis(4-methoxyphenyl)vinyl)-*N*-methyl-5-(trifluoromethyl)benzamide (4r):**

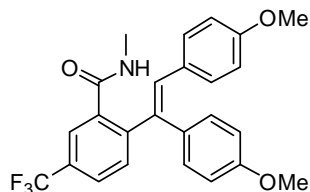

Work-up and purification by column chromatography, brown liquid (128 mg, 58%); IR (KBr): 3446, 1652, 1508, 744 cm<sup>-1</sup>; <sup>1</sup>H NMR (600 MHz, CDCl<sub>3</sub>): δ 7.79 (s, 1H), 7.65 (d, *J* = 7.2 Hz, 1H), 7.50 (d, *J* = 8.4 Hz, 1H), 7.09 (d, *J* = 8.4 Hz, 2H), 7.03 (d, *J* = 8.4 Hz, 2H), 6.77 (d, *J* = 9 Hz, 2H), 6.73 (d, *J* = 8.4 Hz, 2H), 6.68 (s, 1H), 5.74 (s, 1H), 3.79 (s, 3H), 3.78 (s, 3H), 2.65 (d, *J* = 4.8 Hz, 3H); <sup>13</sup>C NMR (150 MHz, CDCl<sub>3</sub>): δ 168.6, 159.1, 158.9, 146.3, 138.3, 136.9, 131.6, 131.3, 130.7, 130.6, 130.4, 129.7 (q, *J*<sub>C-F</sub> = 33 Hz), 129.3, 126.4, 125.6, 123.7 (q, *J*<sub>C-F</sub> = 270 Hz), 114 (q, *J*<sub>C-F</sub> = 14 Hz), 113.7, 113.6, 55.1, 26.7; HRMS [(ESI), (M+Na)<sup>+</sup>]: 464.1453 (cal. for C<sub>25</sub>H<sub>22</sub>F<sub>3</sub>NO<sub>3</sub>Na 464.1449); New compound.

**(E)-*N*-Methyl-2-(1-phenylprop-1-en-1-yl)benzamide (4s):**

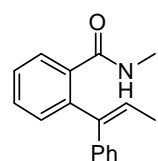

Work-up and purification by column chromatography, colorless viscous oil (42 mg, 34%); IR (KBr): 3445, 1635, 1507, 741 cm<sup>-1</sup>; <sup>1</sup>H NMR (600 MHz, CDCl<sub>3</sub>): δ 7.48 (d, *J* = 7.8 Hz, 1H), 7.38 (t, *J* = 7.8 Hz, 1H), 7.32–7.28 (m, 4H), 7.22 (t, *J* = 7.2 Hz, 1H), 7.12 (d, *J* = 7.2 Hz, 2H), 5.98 (q, *J* = 7.2 Hz, 1H), 5.63 (s, 1H), 2.63 (d, *J* = 4.8 Hz, 3H), 1.92 (d, *J* = 6.6 Hz, 3H); <sup>13</sup>C NMR (150 MHz, CDCl<sub>3</sub>): δ 170.1, 141.9, 141.7, 139.1, 136.1, 130.8, 129.8, 129.7, 128.2, 127.8, 127.3, 127.2, 127.0, 26.5, 15.8; HRMS [(ESI), (M+Na)<sup>+</sup>]: 274.1205 (cal. for C<sub>17</sub>H<sub>17</sub>NONa 274.1207); New compound.

**(E)-N-Methyl-2-(1-phenylprop-1-en-2-yl)benzamide (4s’):**

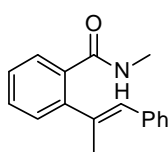

Work-up and purification by column chromatography, white solid (19 mg, 15%), mp: 149–150 °C; IR (KBr): 3501, 1635, 1456, 748 cm<sup>-1</sup>; <sup>1</sup>H NMR (600 MHz, CDCl<sub>3</sub>): δ 7.68 (d, *J* = 7.8 Hz, 1H), 7.44–7.26 (m, 8H), 6.59 (s, 1H), 6.10 (s, 1H), 2.95 (d, *J* = 4.8 Hz, 3H), 2.21 (d, *J* = 1.2 Hz, 3H); <sup>13</sup>C NMR (150 MHz, CDCl<sub>3</sub>): δ 169.9, 143.6, 139.0, 137.4, 134.4, 130.3, 130.1, 128.9, 128.9, 128.7, 128.4, 127.4, 126.9, 26.9, 20.0; HRMS [(ESI), (M+Na)<sup>+</sup>]: 274.1208 (cal. for C<sub>17</sub>H<sub>17</sub>NONa 274.1207); New compound.

**(E)-N-Methyl-2-(1-phenylbut-1-en-1-yl)benzamide (4t):**

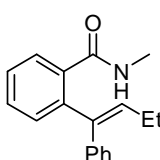

Work-up and purification by column chromatography, white solid (38 mg, 28%), mp: 128–129 °C; IR (KBr): 3520, 1646, 1540, 759 cm<sup>-1</sup>; <sup>1</sup>H NMR (600 MHz, CDCl<sub>3</sub>): δ 7.50 (d, *J* = 7.8 Hz, 1H), 7.39–7.36 (m, 1H), 7.31–7.28 (m, 4H), 7.22 (t, *J* = 7.2 Hz, 1H), 7.12 (d, *J* = 7.2 Hz, 2H), 5.85 (t, *J* = 7.2 Hz, 1H), 5.68 (s, 1H), 2.66 (d, *J* = 5.4 Hz, 3H), 2.32 (quint, *J* = 7.8 Hz, 2H), 1.07 (t, *J* = 7.8 Hz, 3H); <sup>13</sup>C NMR (150 MHz, CDCl<sub>3</sub>): δ 170.0, 141.8, 140.2, 139.4, 136.1, 134.9, 130.8, 129.7, 129.6, 128.2, 127.8, 127.3, 127.1, 26.5, 23.0, 14.5; HRMS [(ESI), (M+Na)<sup>+</sup>]: 288.1364 (cal. for C<sub>18</sub>H<sub>19</sub>N<sub>1</sub>O<sub>1</sub>Na 288.1363); New compound.

**(E)-N-Methyl-2-(1-phenylbut-1-en-2-yl)benzamide (4t’):**

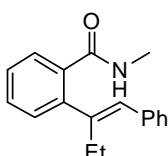

Work-up and purification by column chromatography, white solid (24 mg, 18%), mp: 93–94 °C; IR (KBr): 3419, 1646, 1521, 760 cm<sup>-1</sup>; <sup>1</sup>H NMR (600 MHz, CDCl<sub>3</sub>): δ 7.73 (d, *J* = 7.2 Hz, 1H), 7.44–7.35 (m, 4H), 7.33 (d, *J* = 7.2 Hz, 2H), 7.28 (t, *J* = 7.2 Hz, 2H), 6.54 (s, 1H), 6.19 (s, 1H), 2.93 (d, *J* = 4.8 Hz, 3H), 2.62 (q, *J* = 7.8 Hz, 2H), 0.93 (t, *J* = 7.8 Hz, 3H); <sup>13</sup>C NMR (150 MHz, CDCl<sub>3</sub>): δ 169.8, 145.7, 141.5, 137.2, 134.5, 130.1, 129.9, 129.6, 128.9, 128.6, 128.4, 127.5, 126.9, 26.9, 25.6, 12.9; HRMS [(ESI), (M+Na)<sup>+</sup>]: 288.1364 (cal. for C<sub>18</sub>H<sub>19</sub>N<sub>1</sub>O<sub>1</sub>Na 288.1363); Registry Number: [1427042-14-5].

**(E)-N-Methyl-2-(1-phenylpent-1-en-1-yl)benzamide (4u):**

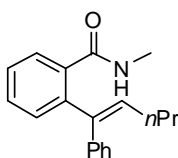

Work-up and purification by column chromatography, white solid (43 mg, 31%), mp: 78–79 °C; IR (KBr): 3565, 1698, 1540, 1264, 748 cm<sup>-1</sup>; <sup>1</sup>H NMR (600 MHz, CDCl<sub>3</sub>): δ 7.49 (d, *J* = 7.2 Hz, 1H), 7.38 (t, *J* = 7.8 Hz, 1H), 7.31–7.28 (m, 4H), 7.22 (t, *J* = 7.2 Hz, 1H), 7.12 (d, *J* = 7.2 Hz, 2H), 5.87 (t, *J* = 7.2 Hz, 1H), 5.70 (s, 1H), 2.66 (d, *J* = 4.8 Hz, 3H), 2.29 (q, *J* = 7.8 Hz, 2H), 1.49 (sext, *J* = 7.2 Hz, 2H), 0.94 (t, *J* = 7.2 Hz, 3H); <sup>13</sup>C NMR (150 MHz, CDCl<sub>3</sub>): δ 170.0, 141.9, 140.8, 139.5, 136.1, 133.3, 130.8, 129.7, 129.7, 128.3, 127.8, 127.2, 127.0, 31.7, 26.5, 23.2, 13.8; HRMS [(ESI), (M+Na)<sup>+</sup>]: 302.1512 (cal. for C<sub>19</sub>H<sub>21</sub>NONa 302.1520); New compound.

**(E)-N-Methyl-2-(1-phenylpent-1-en-2-yl)benzamide (4u’):**

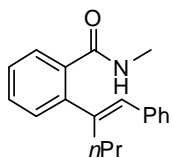

Work-up and purification by column chromatography, white solid (28 mg, 20%), mp: 92–93 °C; IR (KBr): 3446, 1683, 1558, 1265, 743 cm<sup>-1</sup>; <sup>1</sup>H NMR (600 MHz, CDCl<sub>3</sub>): δ 7.73 (d, *J* = 7.2 Hz, 1H), 7.44–7.35 (m, 4H), 7.33–7.27 (m, 4H), 6.57 (s, 1H), 6.19 (s, 1H), 2.95 (d, *J* = 1.8 Hz, 3H), 2.56–2.53 (m, 2H), 1.31 (sext, *J* = 7.8 Hz, 2H), 0.82 (t, *J* = 7.2 Hz, 3H); <sup>13</sup>C NMR (150 MHz, CDCl<sub>3</sub>): δ 169.8, 144.6, 141.9, 137.2, 134.3, 130.1, 130.1, 129.7, 128.8, 128.6, 128.4, 127.5, 126.9, 34.5, 26.9, 21.7, 14.0; HRMS [(ESI), (M+Na)<sup>+</sup>]: 302.1518 (cal. for C<sub>19</sub>H<sub>21</sub>NONa 302.1520); New compound.

**(E)-N-Methyl-2-(1-phenyl-2-(trimethylsilyl)vinyl)benzamide (4v):**

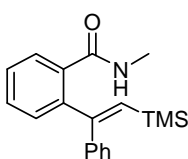

Work-up and purification by column chromatography, white solid (12 mg, 8%), mp: 95–96 °C; IR (KBr): 3445, 1698, 1558, 749 cm<sup>-1</sup>; <sup>1</sup>H NMR (600 MHz, CDCl<sub>3</sub>): δ 7.47 (dd, *J* = 7.2, 1.2 Hz, 1H), 7.36 (td, *J* = 7.5, 1.2 Hz, 1H), 7.31–7.26 (m, 5H), 7.18–7.17 (m, 2H), 6.01 (s, 1H), 5.68 (s, 1H), 2.70 (d, *J* = 5.4 Hz, 3H), -0.03 (s, 9H); <sup>13</sup>C NMR (150 MHz, CDCl<sub>3</sub>): δ 170.0, 157.5, 143.5, 142.1, 135.7,



134.3, 130.2, 129.6, 129.3, 128.0, 127.8, 127.7, 127.6, 26.5, 0.1; HRMS [(ESI), (M+Na)<sup>+</sup>]: 332.1444 (cal. for C<sub>19</sub>H<sub>23</sub>NOSiNa 332.1446); New compound.

**(Z)-N-Methyl-2-(2-phenyl-1-(trimethylsilyl)vinyl)benzamide (4v<sup>7</sup>):**

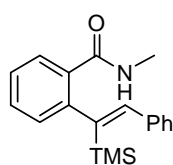

Work-up and purification by column chromatography, white solid (85 mg, 55%), mp: 101–102 °C; IR (KBr): 3419, 1683, 1540, 749 cm<sup>-1</sup>; <sup>1</sup>H NMR (600 MHz, CDCl<sub>3</sub>): δ 7.84 (dd, *J* = 7.8, 1.2 Hz, 1H), 7.42–7.37 (m, 3H), 7.34–7.30 (m, 5H), 7.09 (dd, *J* = 7.2, 0.6 Hz, 1H), 6.40 (s, 1H), 2.98 (d, *J* = 4.8 Hz, 3H), -0.10 (s, 9H); <sup>13</sup>C NMR (150 MHz, CDCl<sub>3</sub>): δ 169.3, 148.9, 145.1, 144.6, 139.0, 133.2, 130.3, 129.0, 128.9, 128.3, 128.2, 127.8, 126.4, 26.7, 0.3; HRMS [(ESI), (M+Na)<sup>+</sup>]: 332.1444 (cal. for C<sub>19</sub>H<sub>23</sub>NOSiNa 332.1446); New compound.

**2-Methyl-3,4,5,6-tetraphenylpyridine (5):**

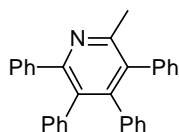

Work-up and purification by column chromatography, white solid (119 mg, 60%), mp: 157–158 °C; IR (KBr): 2957, 1537, 1398, 1028, 698 cm<sup>-1</sup>; <sup>1</sup>H NMR (600 MHz, CDCl<sub>3</sub>): δ 7.34–7.33 (m, 2H), 7.21–7.18 (m, 5H), 7.16–7.15 (m, 1H), 7.06–7.05 (m, 2H), 6.97–6.95 (m, 3H), 6.90–6.88 (m, 3H), 6.85–6.83 (m, 2H), 6.74–6.72 (m, 2H), 2.48 (s, 3H); <sup>13</sup>C NMR (150 MHz, CDCl<sub>3</sub>): δ 156.1, 155.3, 149.3, 140.9, 138.8, 138.4, 138.1, 134.7, 132.6, 131.4, 130.2, 130.0, 129.9, 127.8, 127.6, 127.3, 127.2, 126.9, 126.6, 126.1, 24.3; HRMS [(ESI), (M+H)<sup>+</sup>]: 398.1906 (cal. for C<sub>30</sub>H<sub>24</sub>N 398.1909); Registry Number: [41728-97-6].

**References**

- (1) Abe T.; Takahashi Y.; Matsubara Y.; Yamada K. *Org. Chem. Front.* **2017**, *4*, 2124.
- (2) Shu, Z.; Guo, Y.; Li, W.; Wang, B. *Catal. Today* **2017**, *297*, 292.

**$^1\text{H}$  and  $^{13}\text{C}$  NMR Spectra for Products ( $\text{CDCl}_3$ )**  
**2-Methyl-3,4-diphenylisoquinolin-1(2*H*)-one (3a) (600 MHz)**

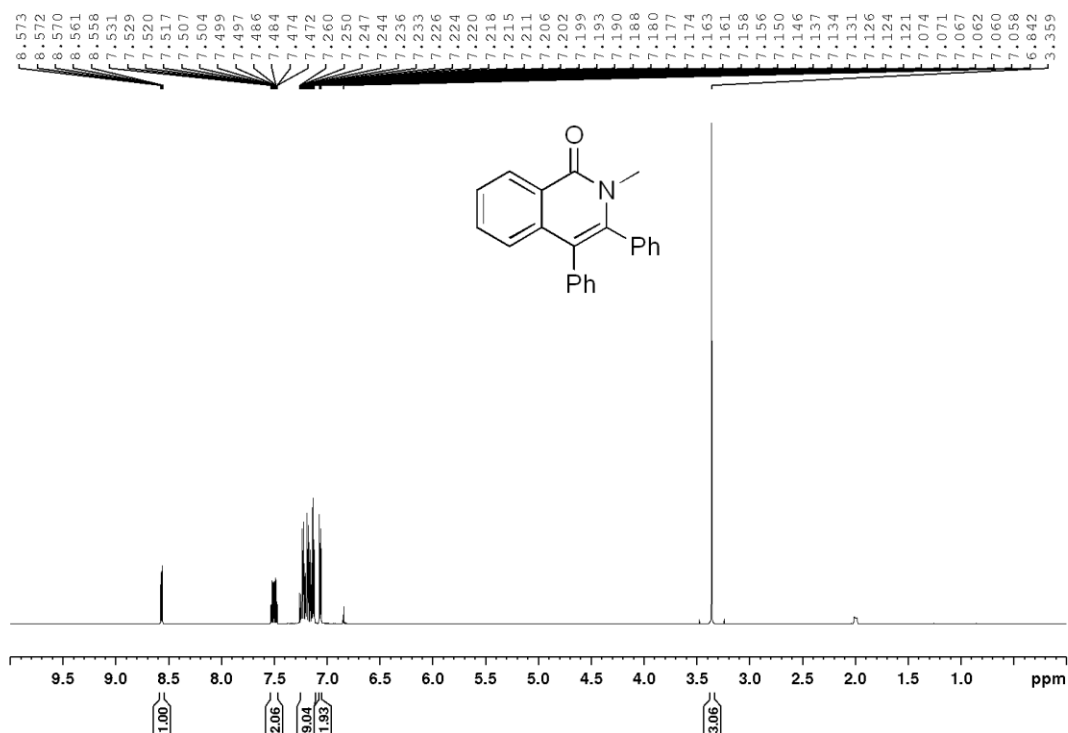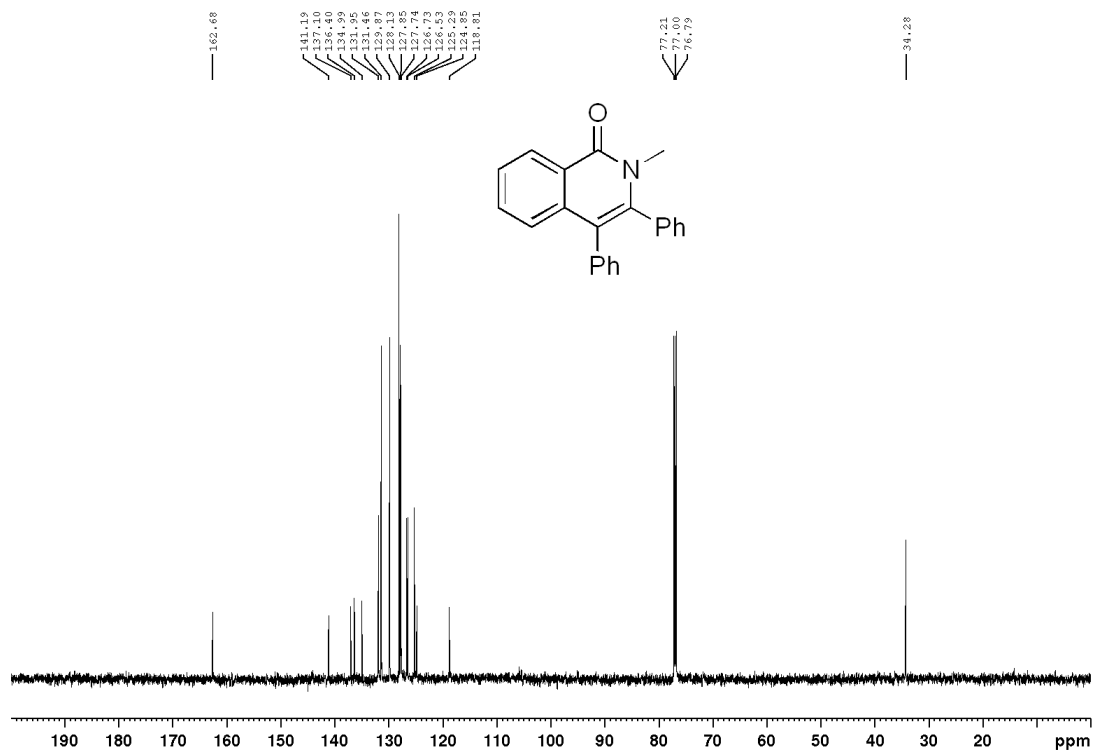

7-Methoxy-2-methyl-3,4-diphenylisoquinolin-1(2H)-one (3b) (600 MHz)

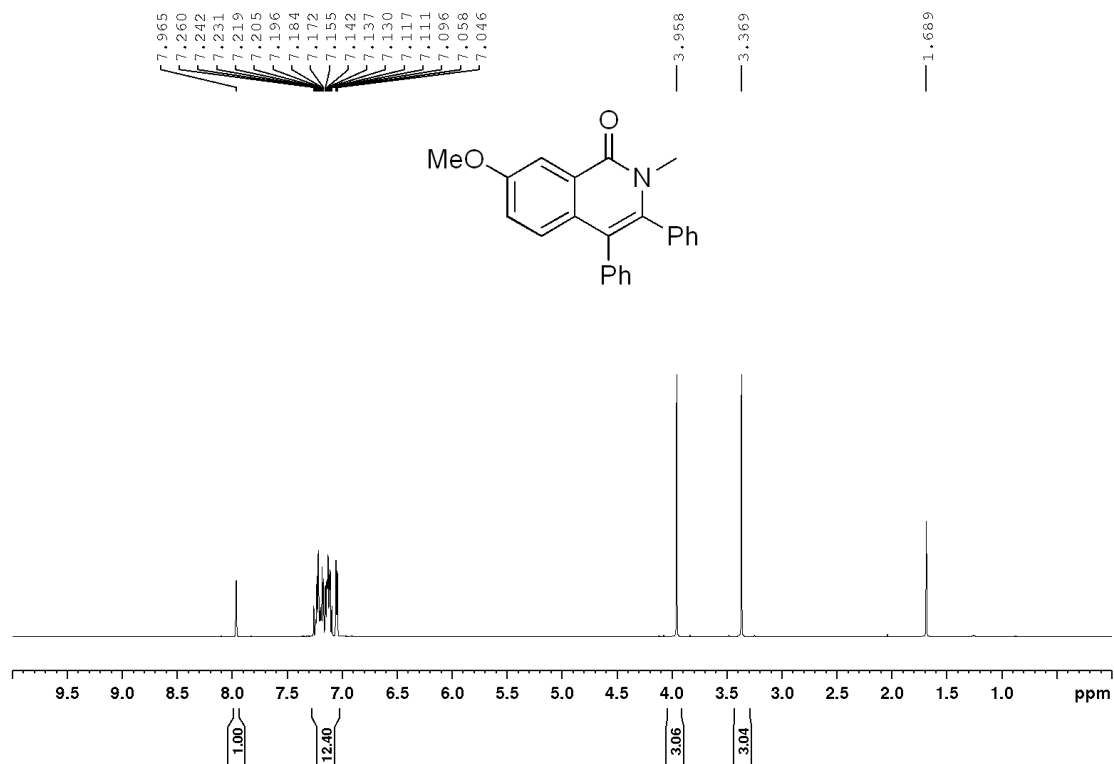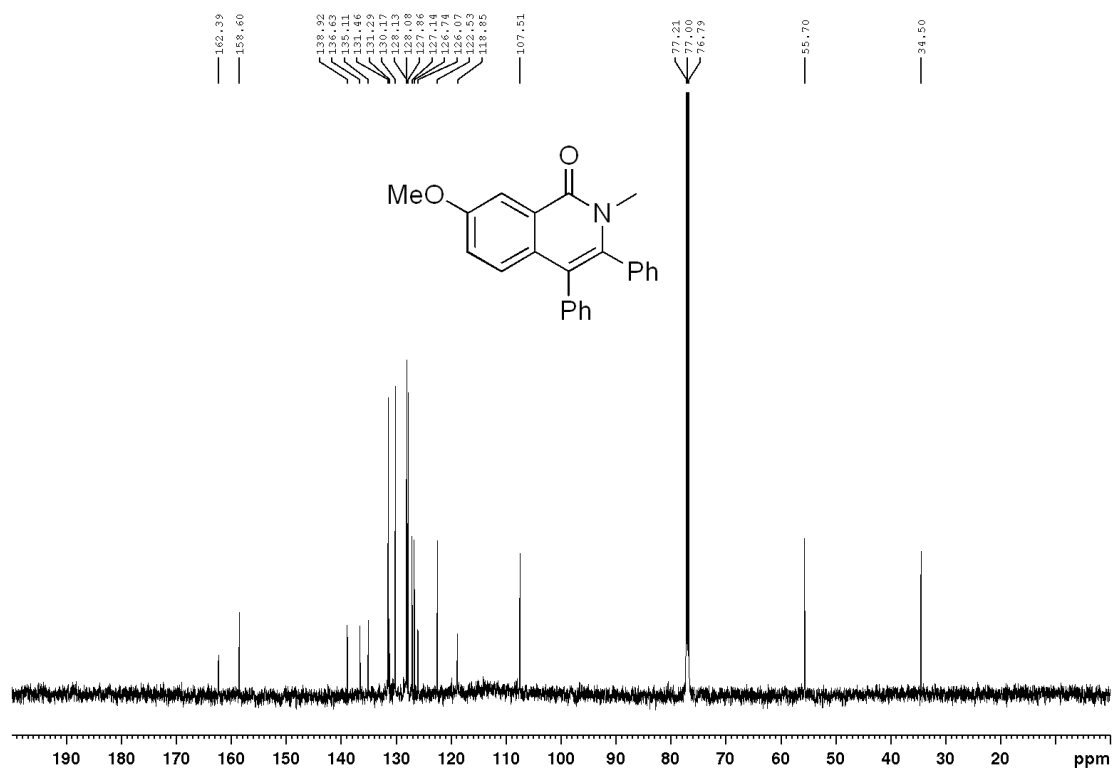

2,7-Dimethyl-3,4-diphenylisoquinolin-1(2H)-one (3c) (400 MHz)

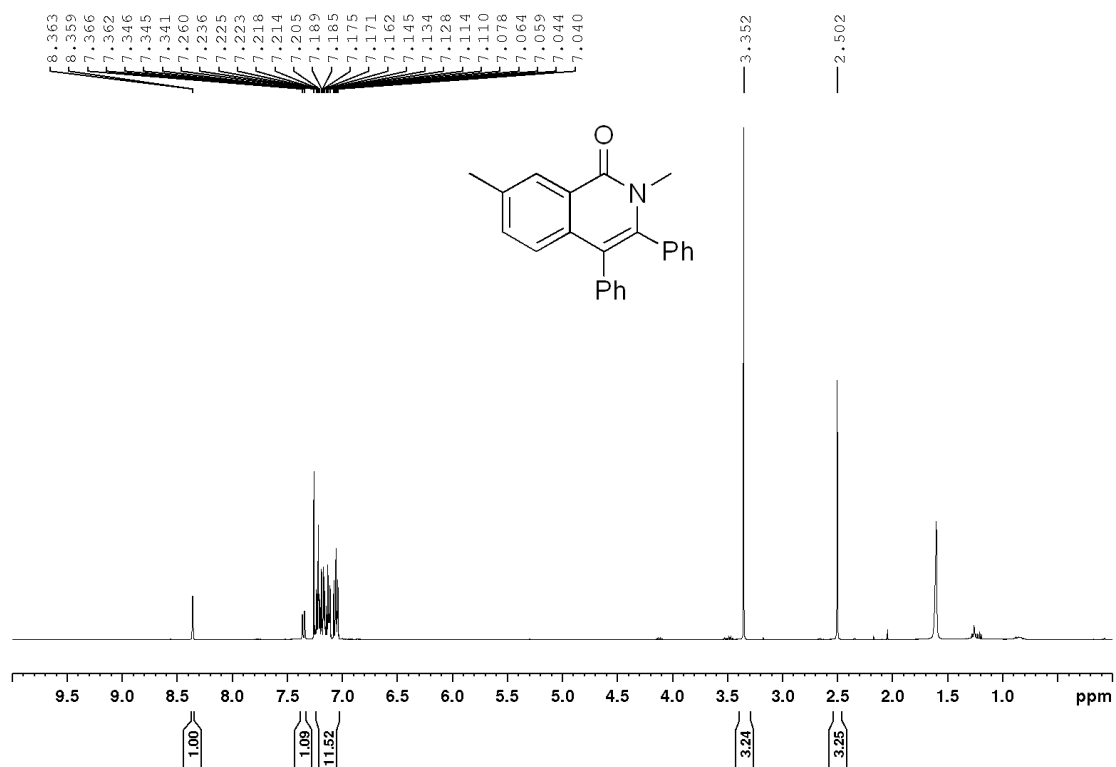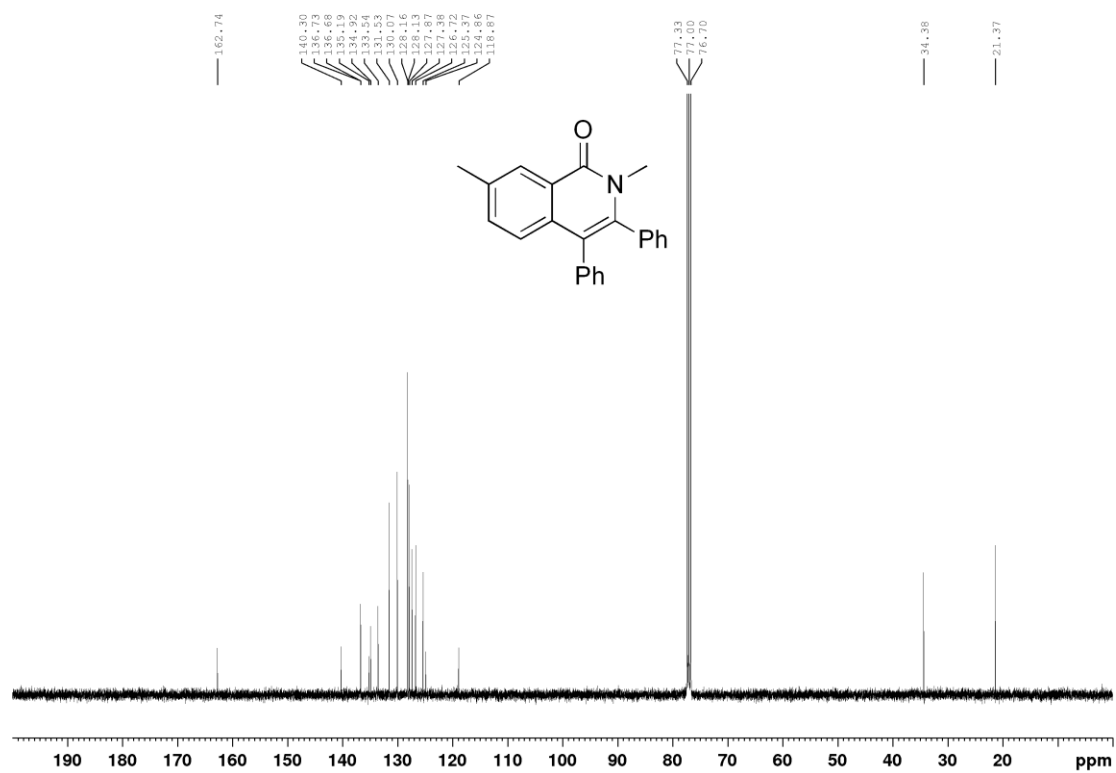

2-Methyl-3,4-diphenyl-7-(trifluoromethyl)isoquinolin-1(2H)-one (3d) (400 MHz)

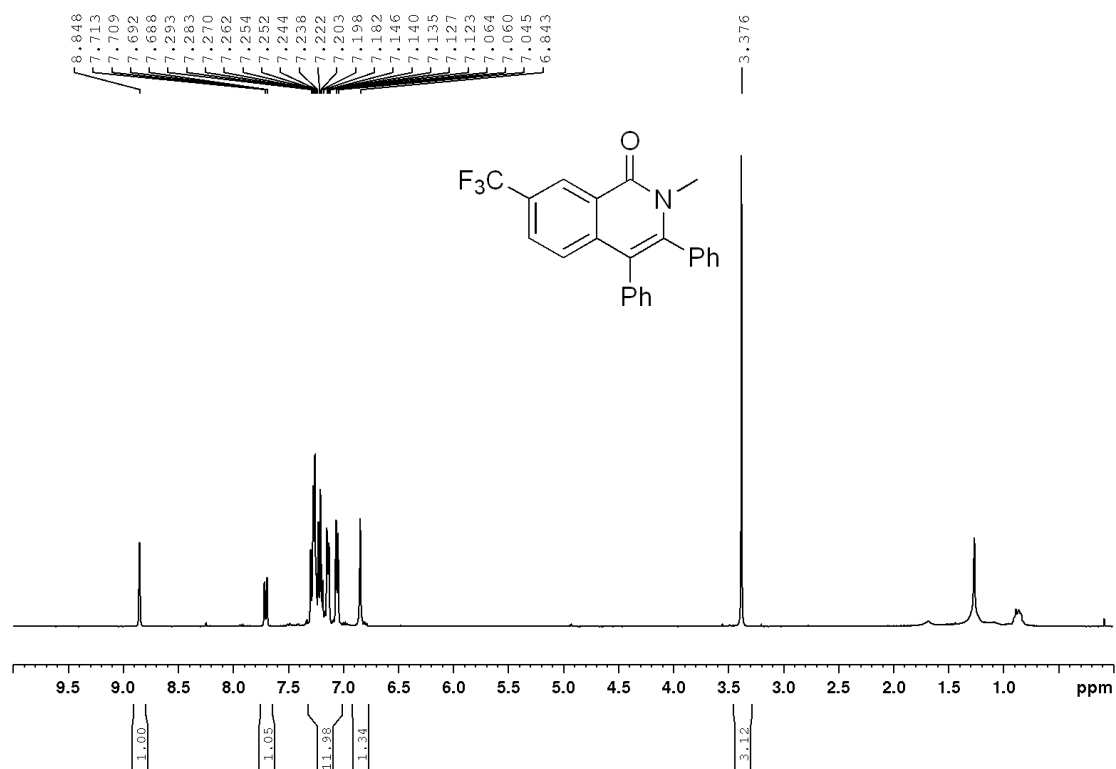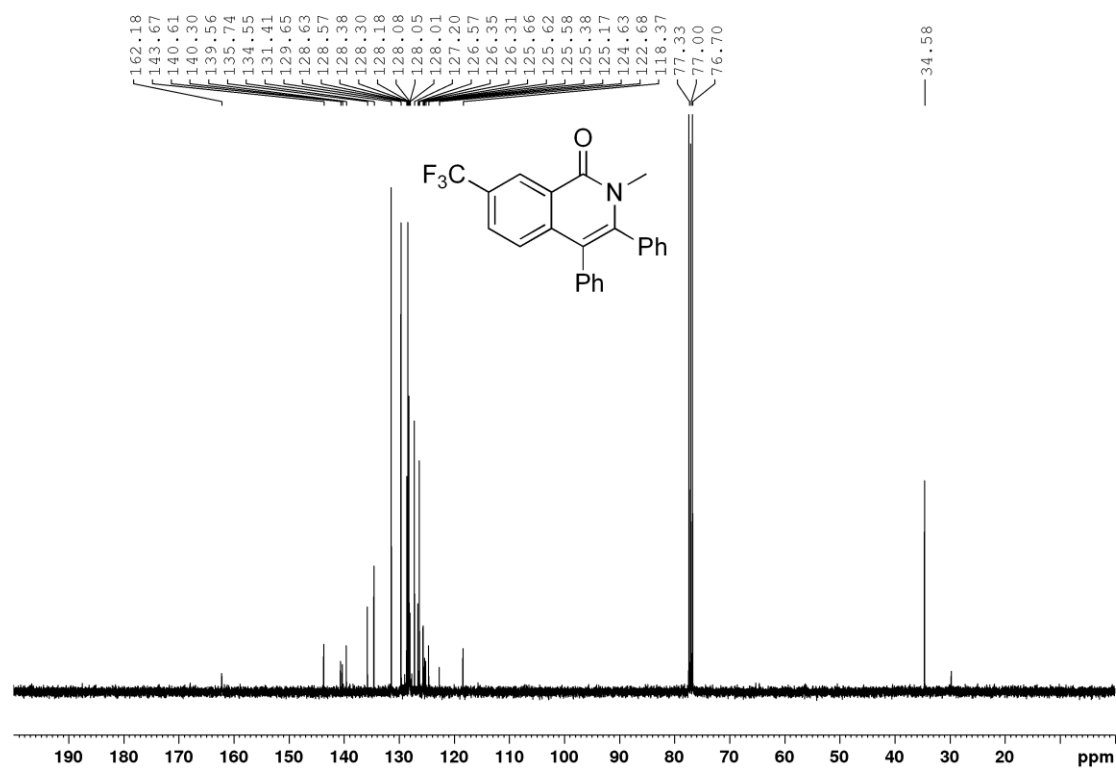

2,6-Dimethyl-3,4-diphenylisoquinolin-1(2H)-one (3e) (600 MHz)

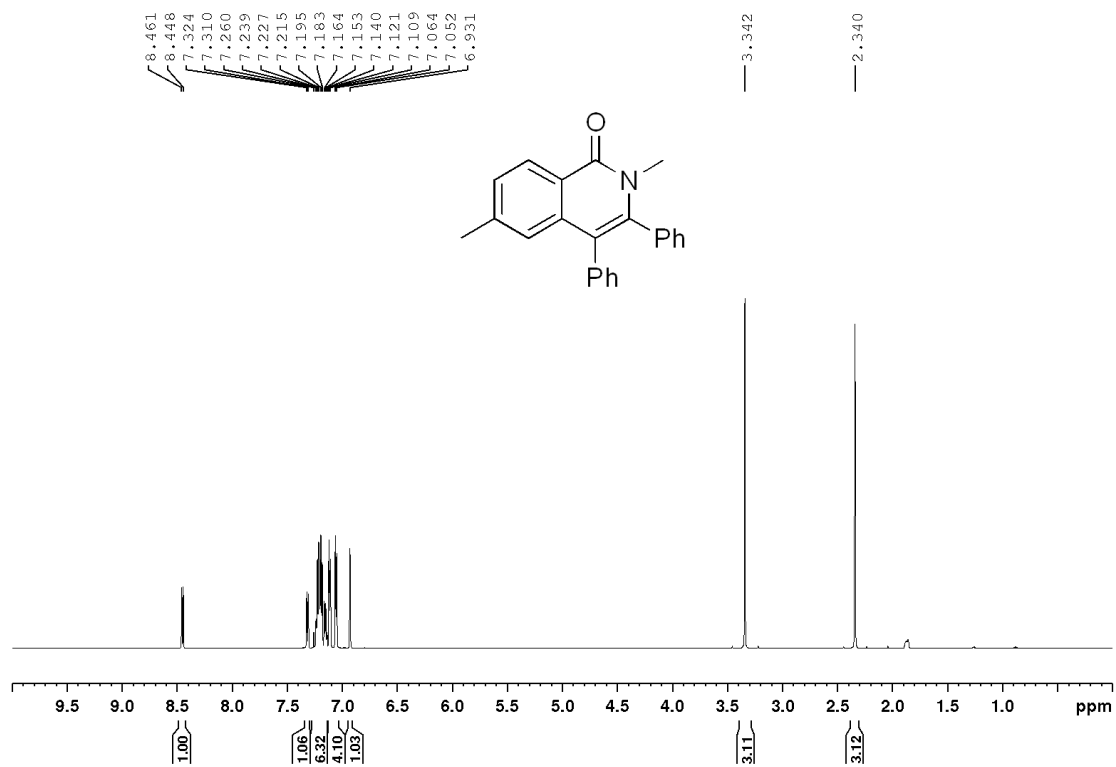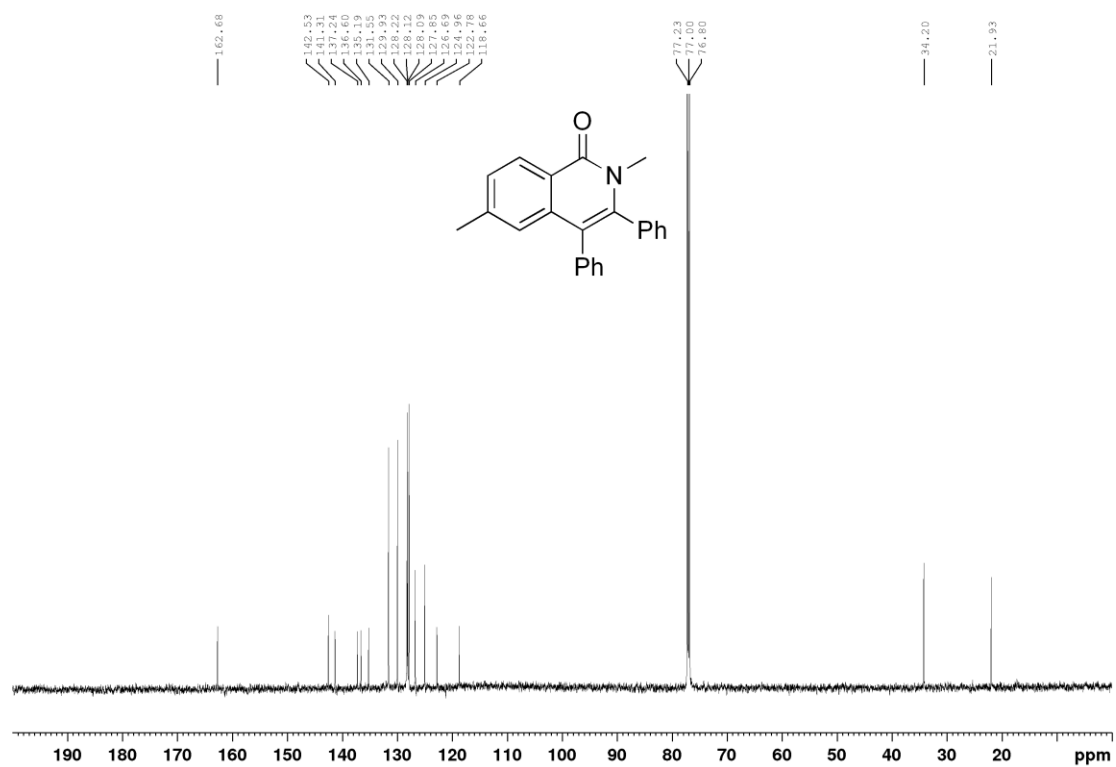

6-Chloro-2-methyl-3,4-diphenylisoquinolin-1(2H)-one (3f) (600 MHz for  $^1\text{H}$ , 100 MHz  $^{13}\text{C}$ )

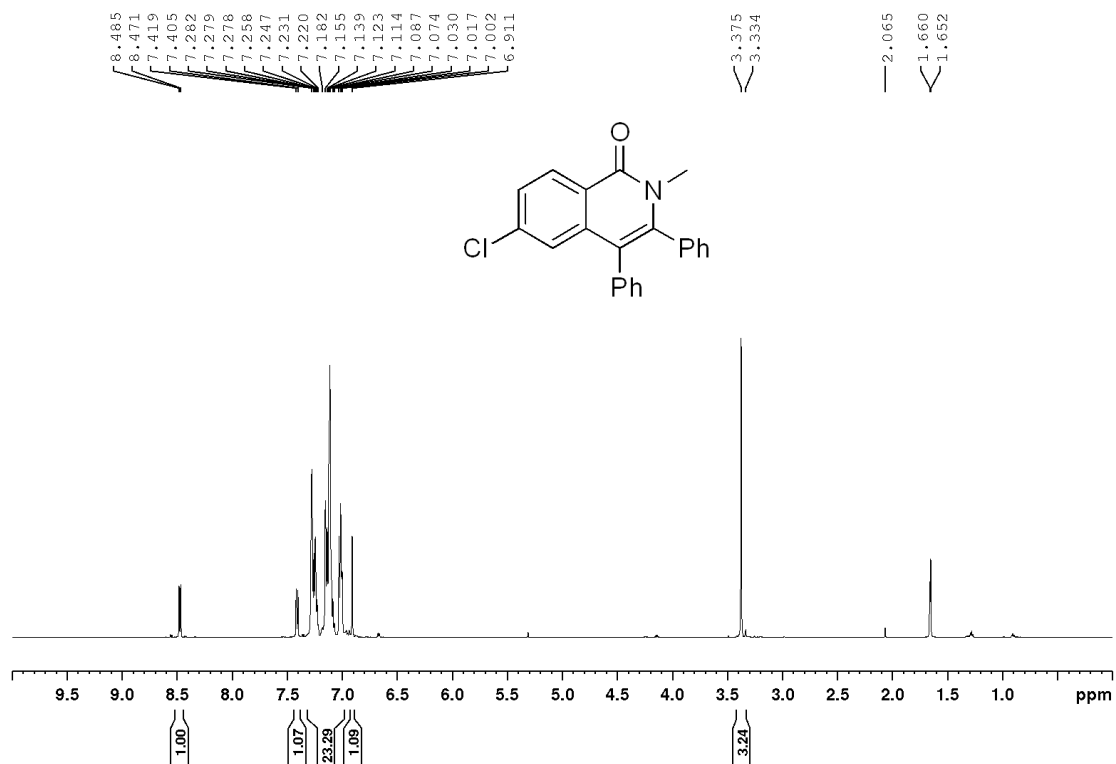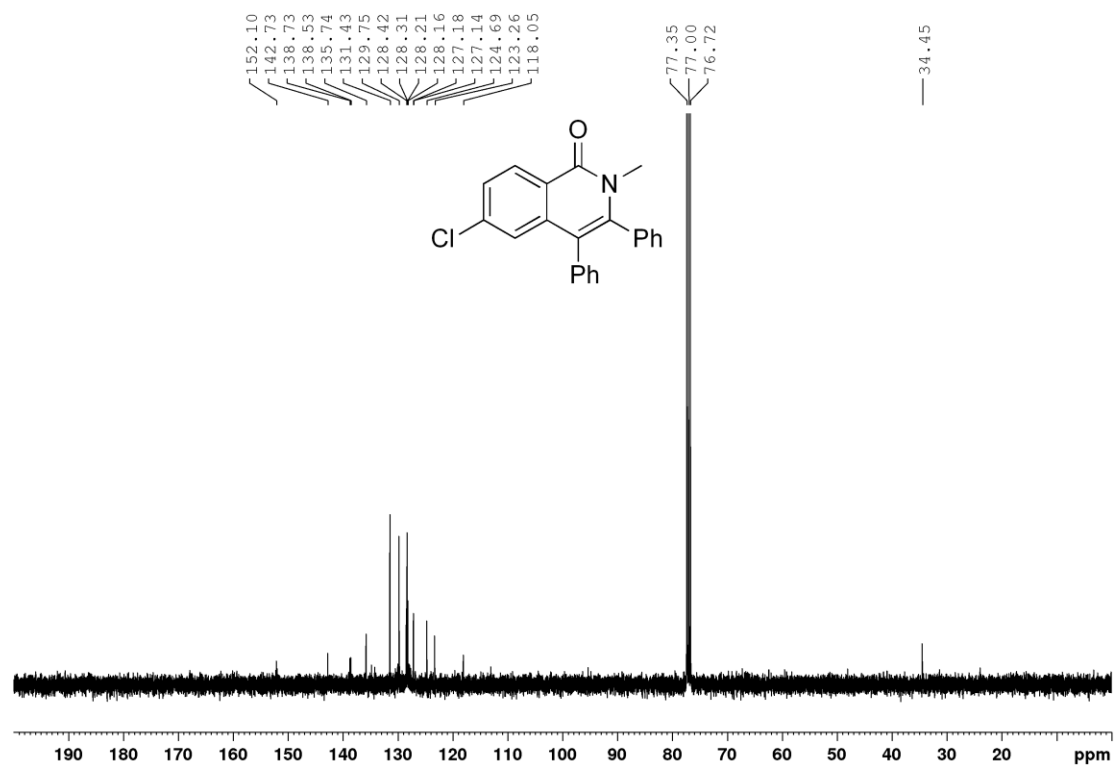

**6,7-Dimethoxy-2-methyl-3,4-diphenylisoquinolin-1(2H)-one (3g) (400 MHz)**

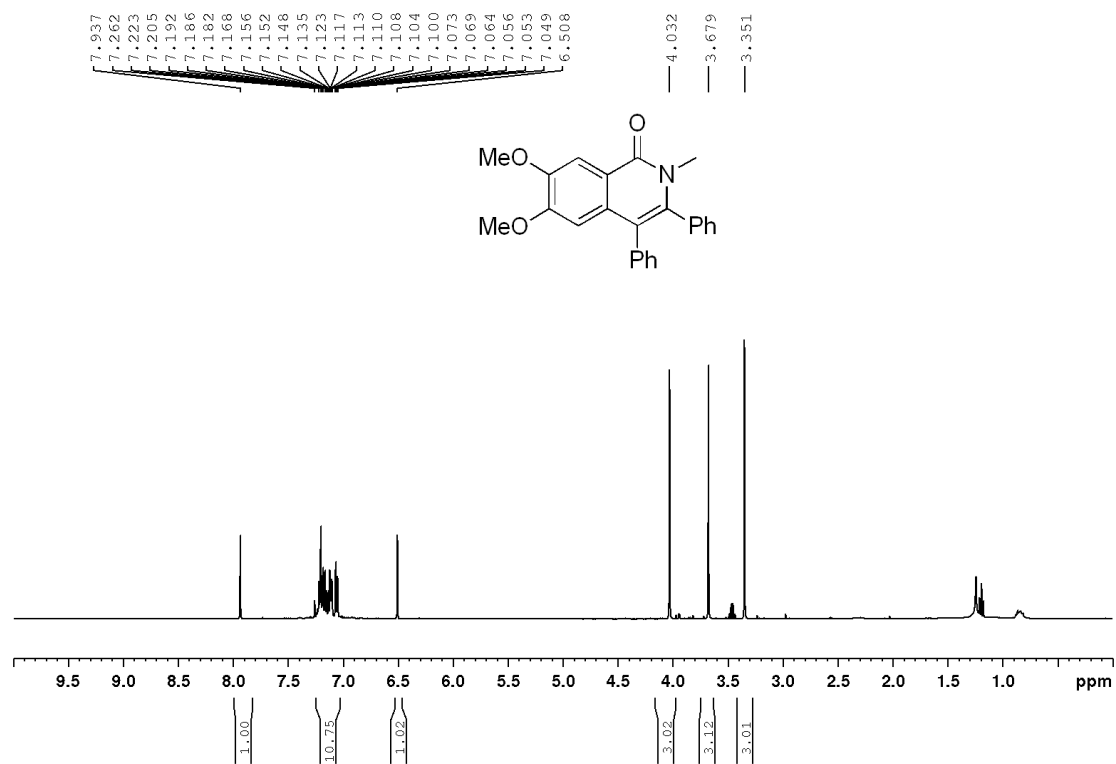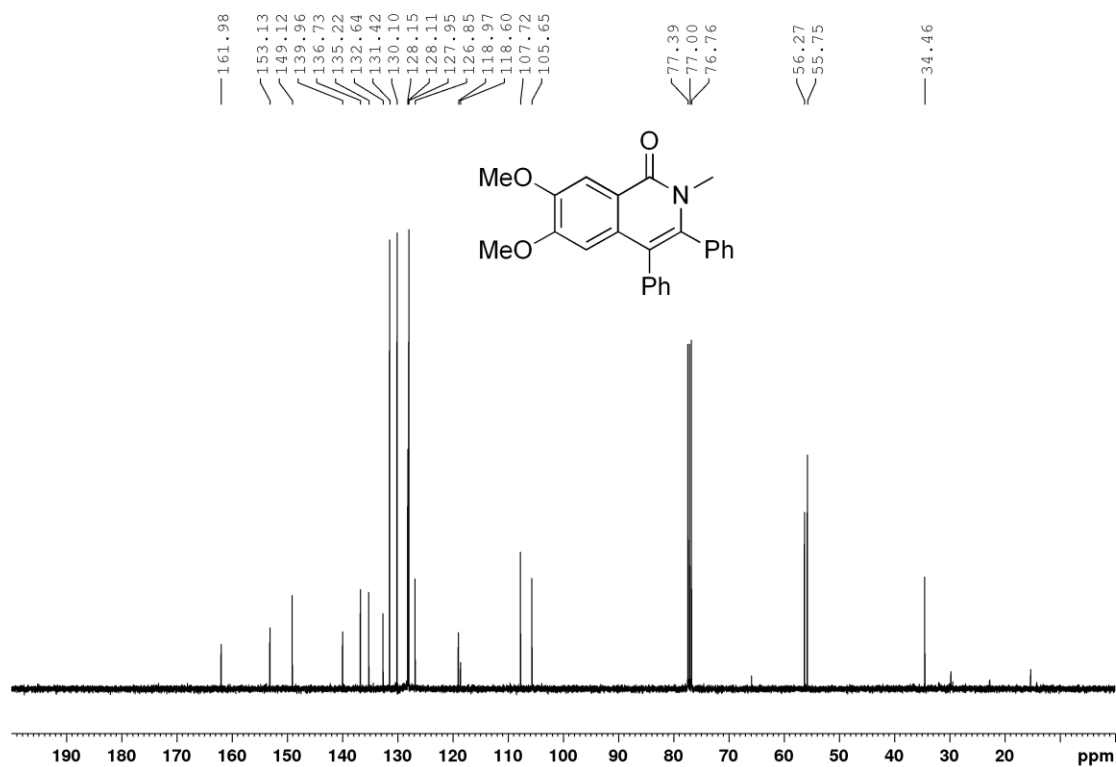



**2,5-Dimethyl-3,4-diphenylisoquinolin-1(2H)-one (3h) (600 MHz)**

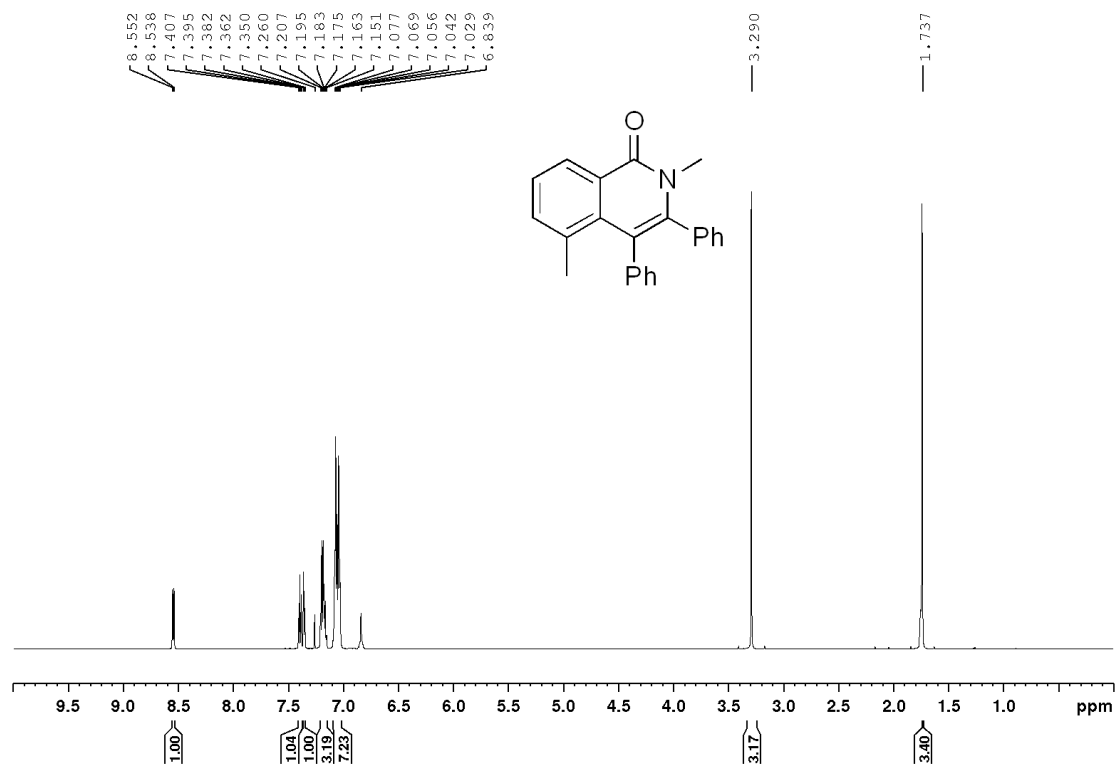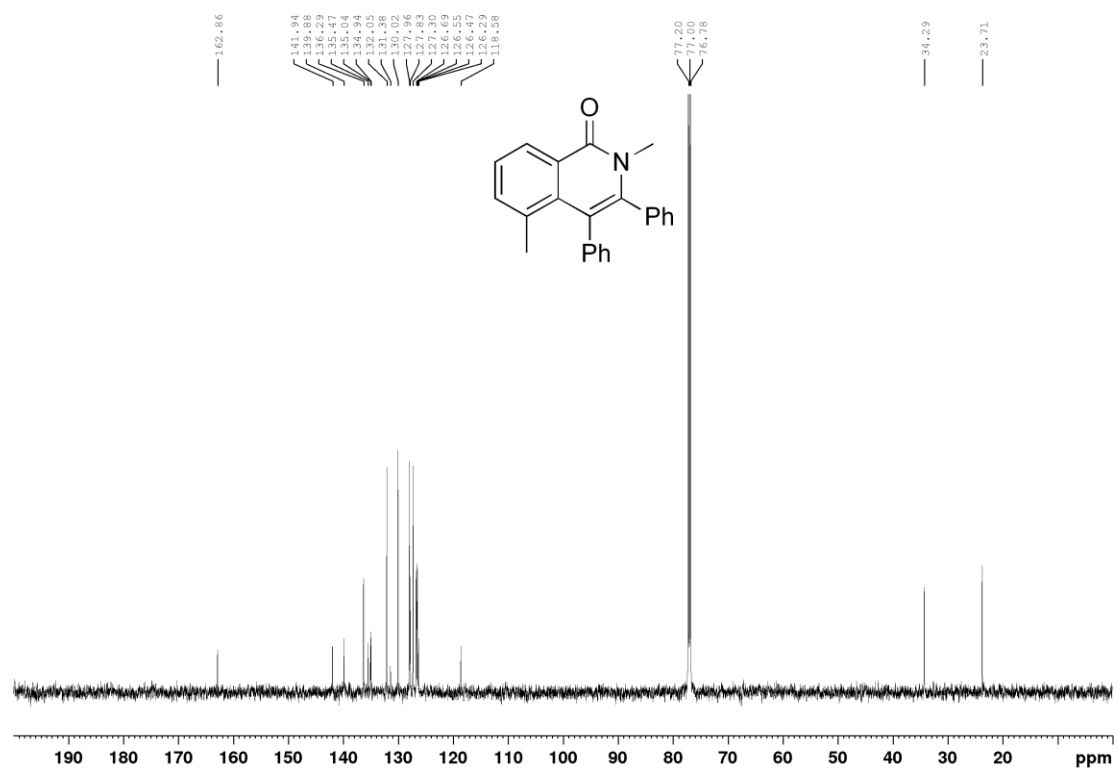



6-Methyl-4,5-diphenylthieno[2,3-c]pyridin-7(6H)-one (3j) (400 MHz)

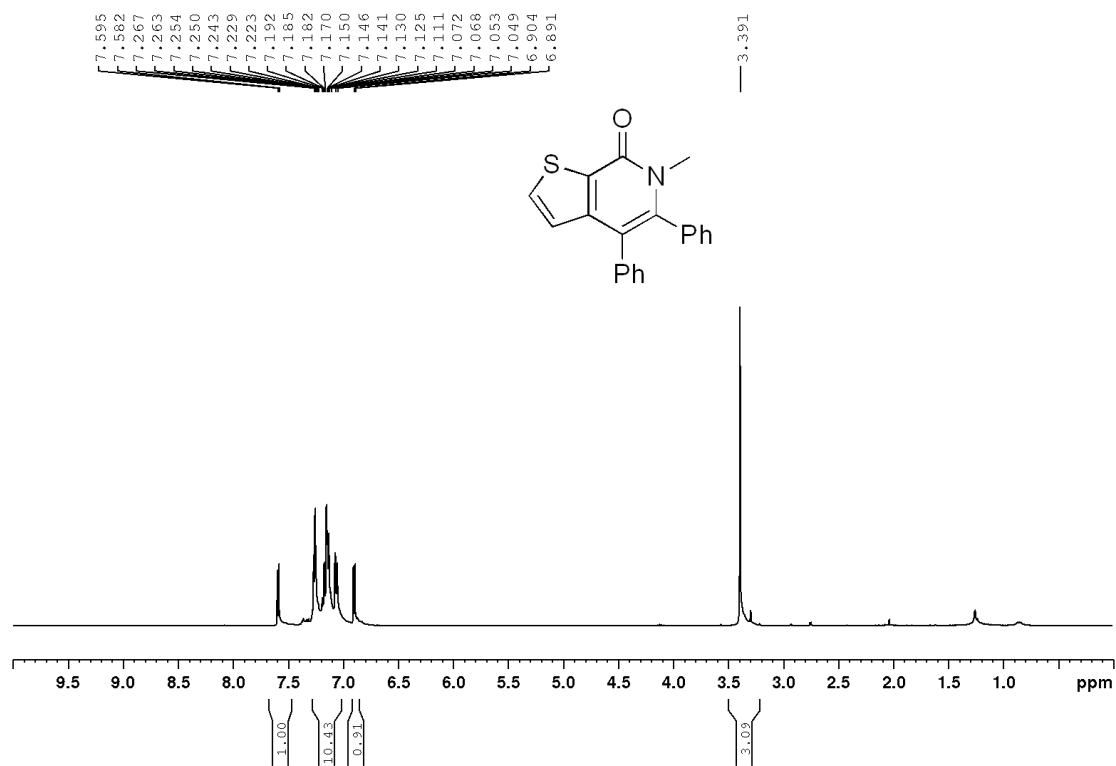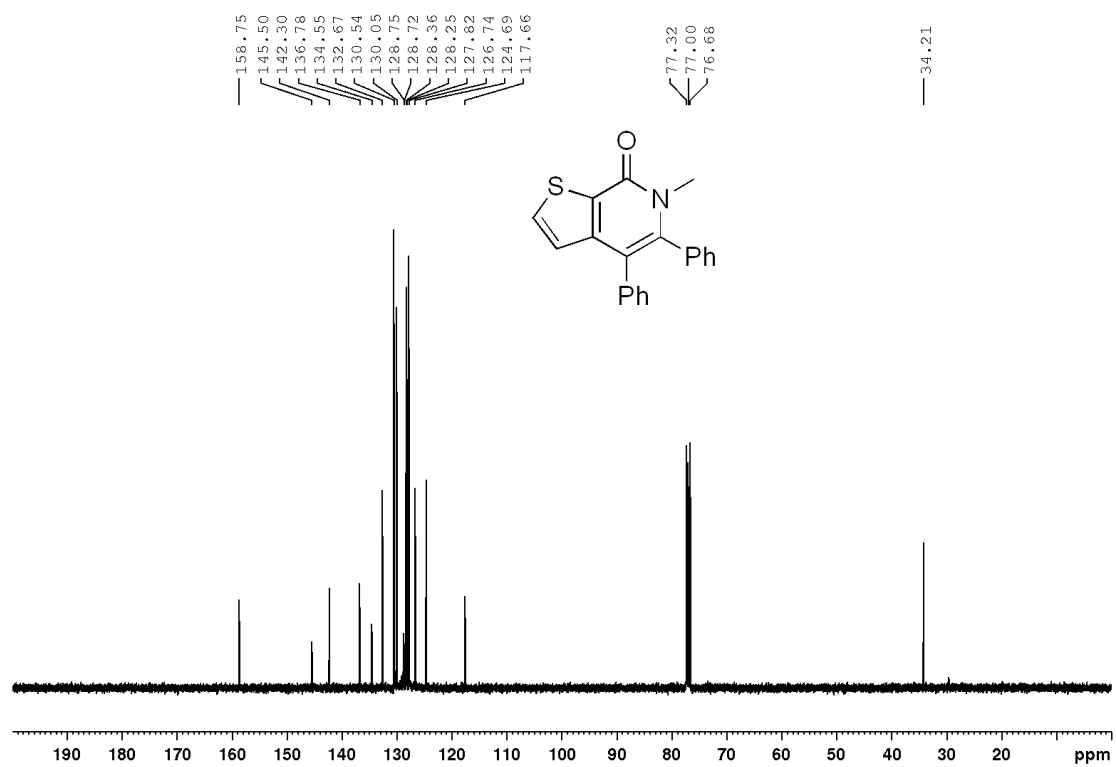

**3,4-Bis(4-methoxyphenyl)-2-methylisoquinolin-1(2H)-one (3k) (600 MHz)**

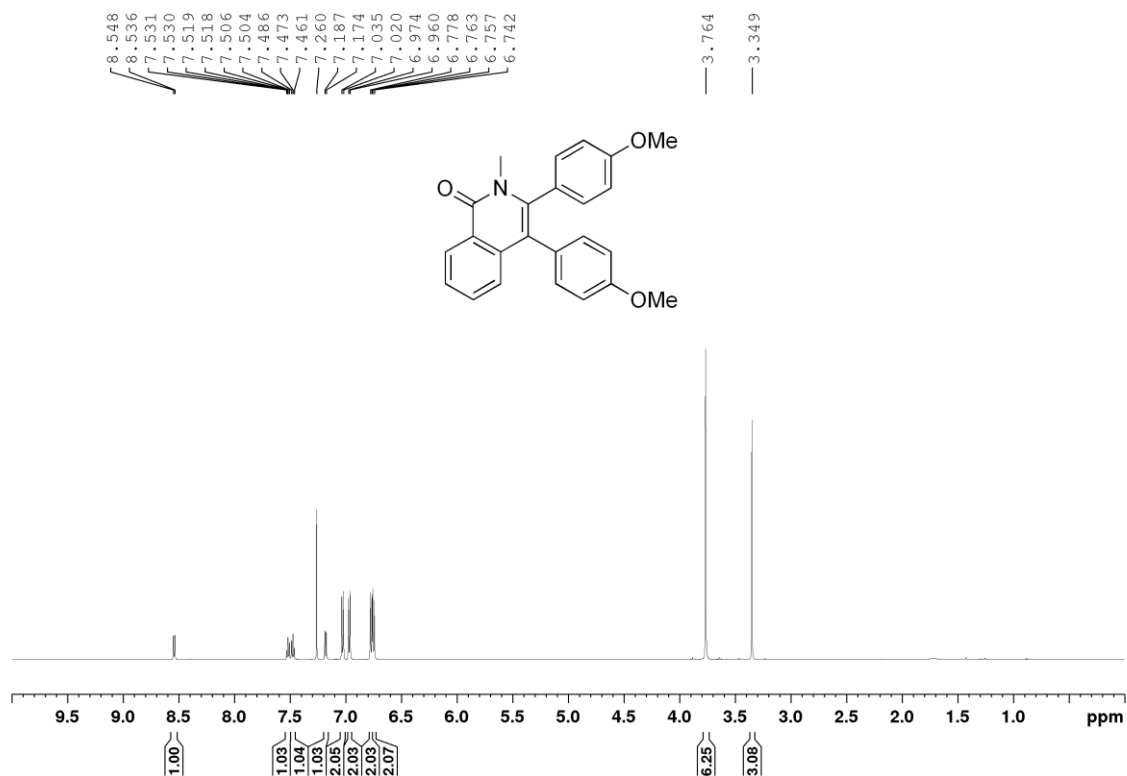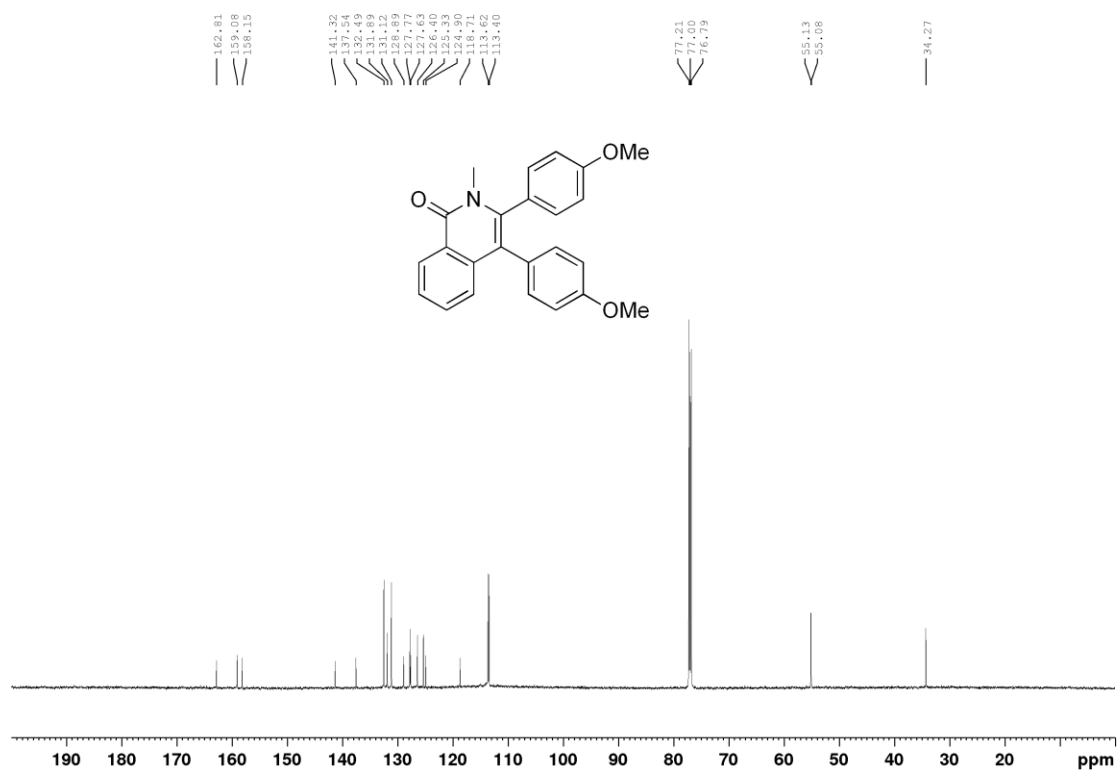

3,4-Diethyl-2-methylisoquinolin-1(2H)-one (3l) (400 MHz)

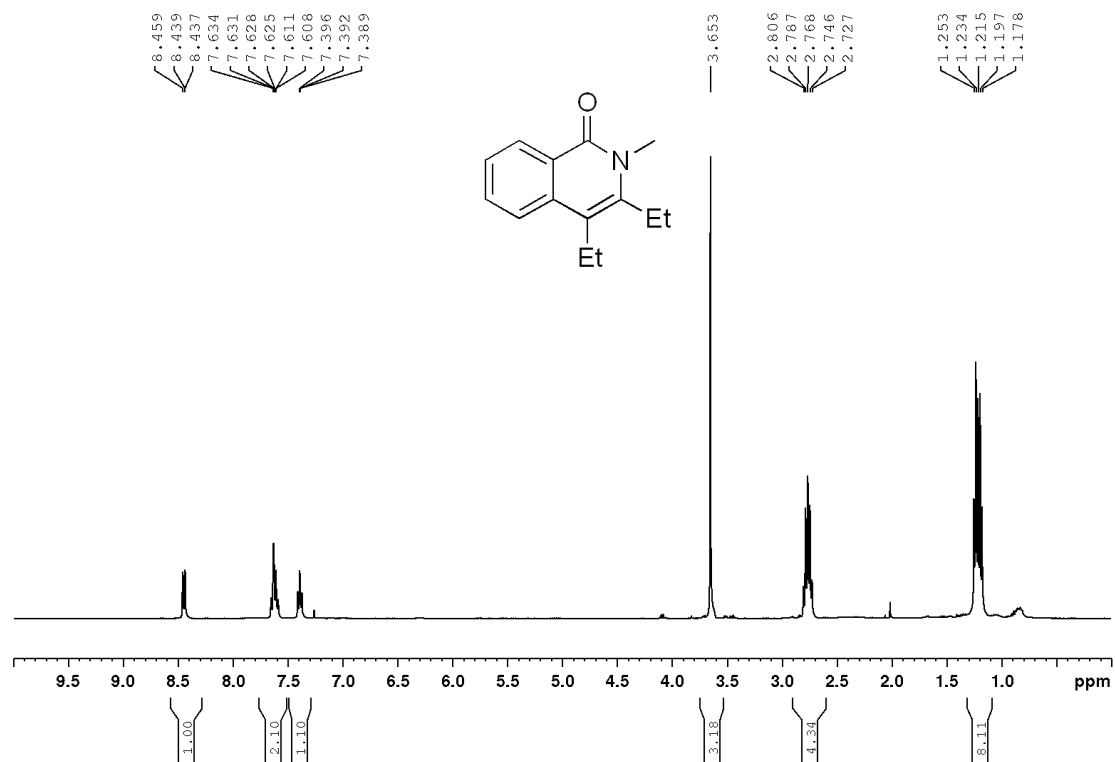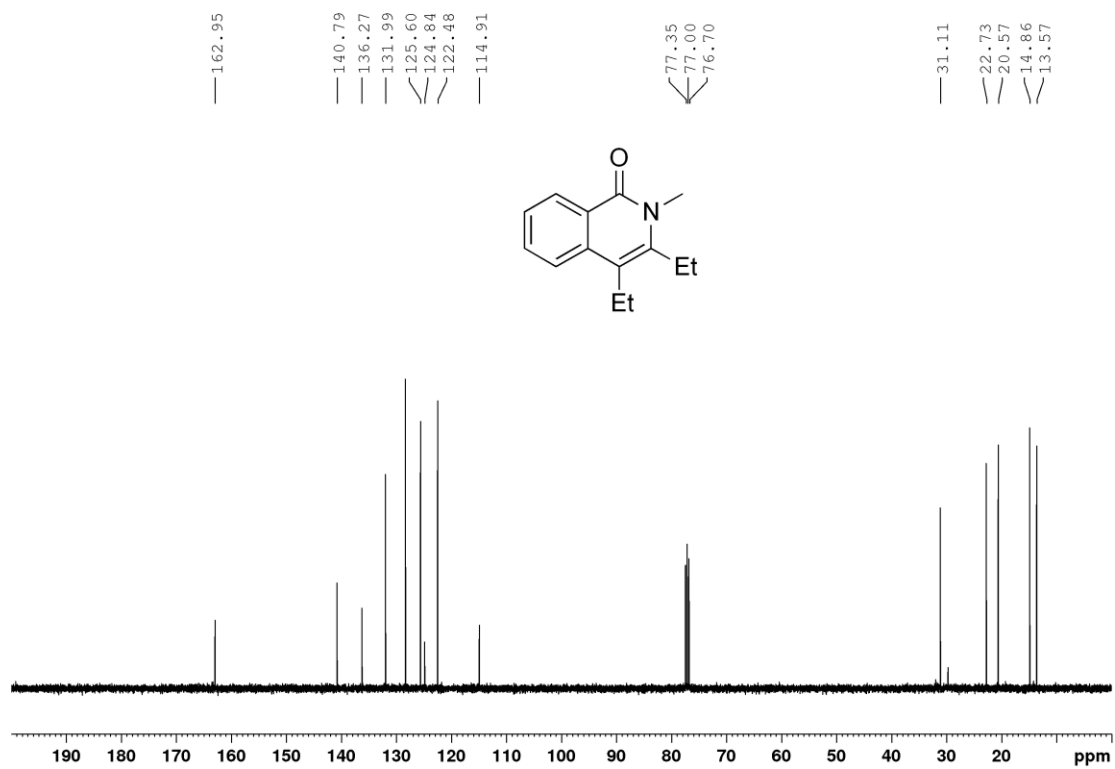

2-Methyl-3,4-dipropylisoquinolin-1(2H)-one (3m) (400 MHz)

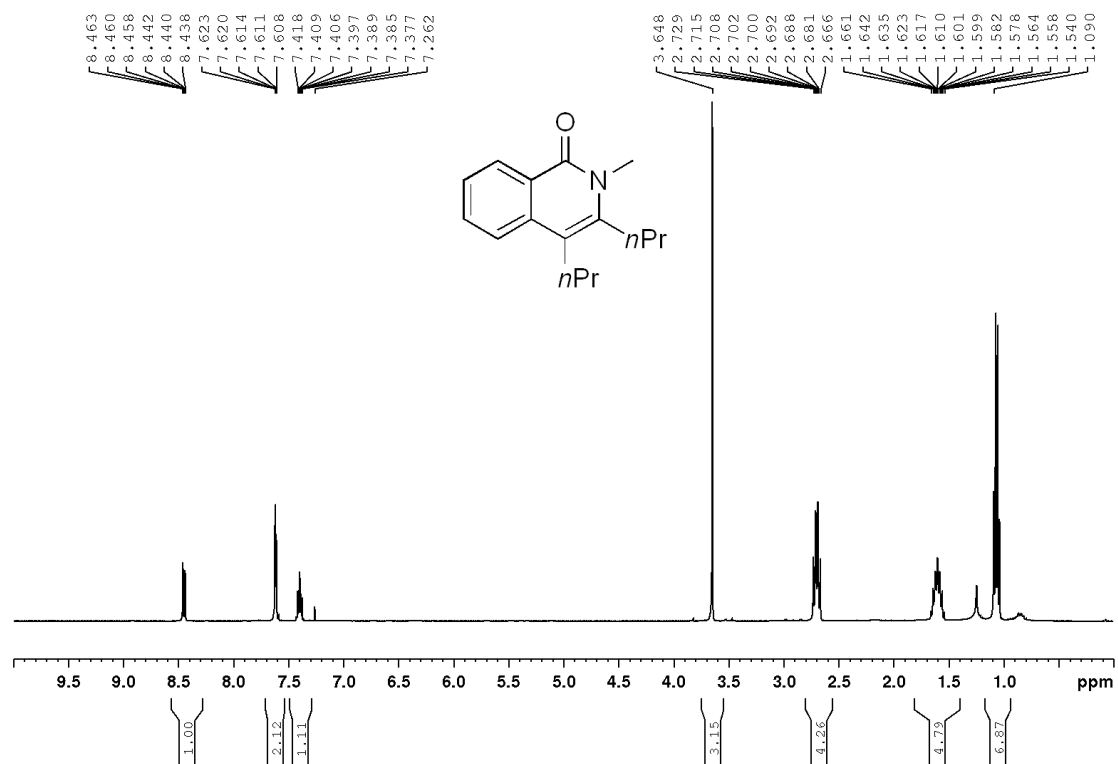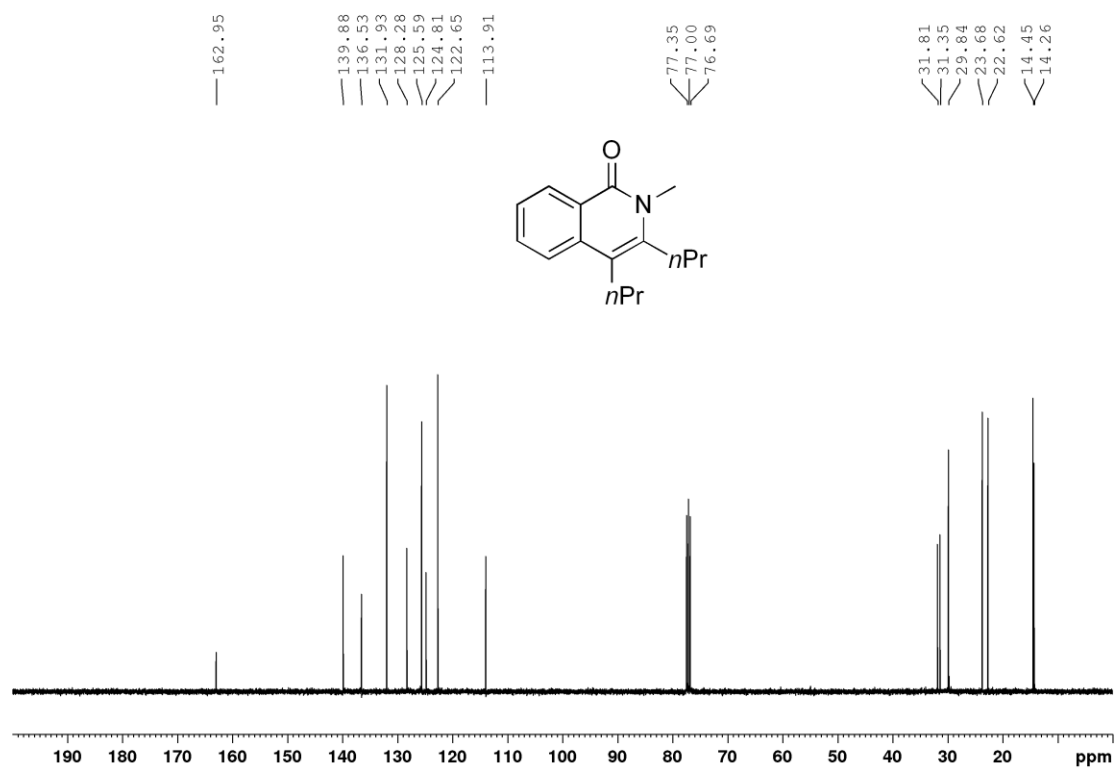

3,4-Diethyl-6,7-dimethoxy-2-methylisoquinolin-1(2H)-one (3n) (400 MHz)

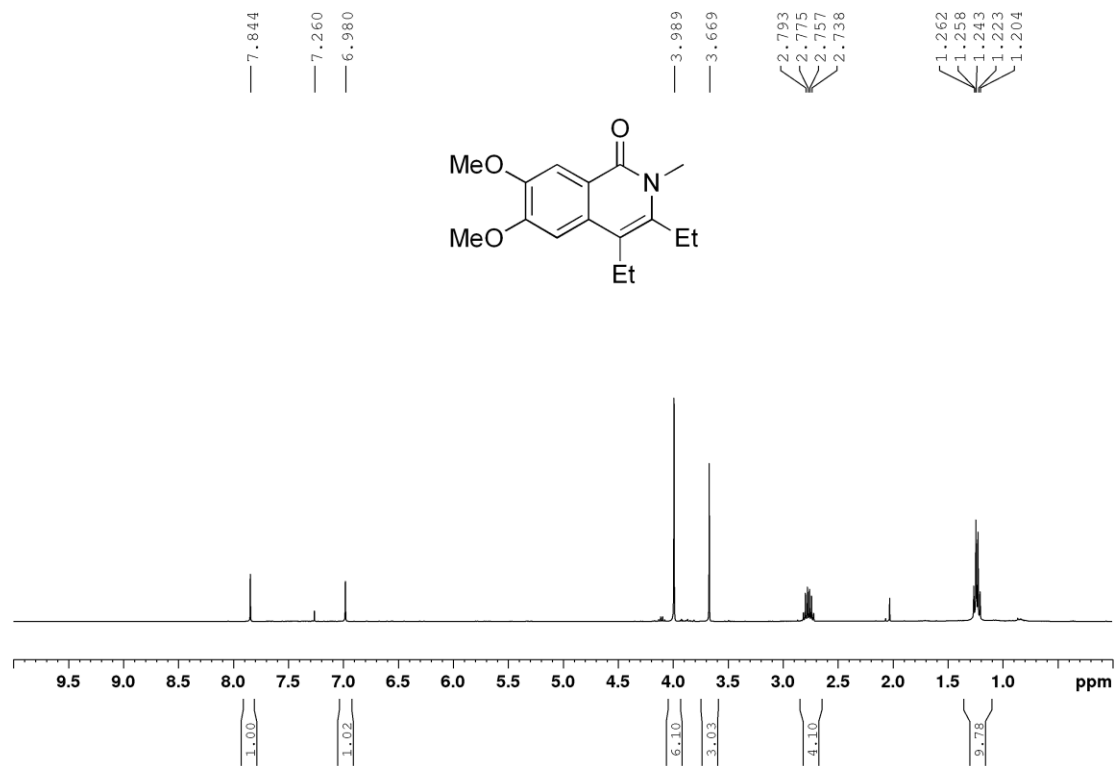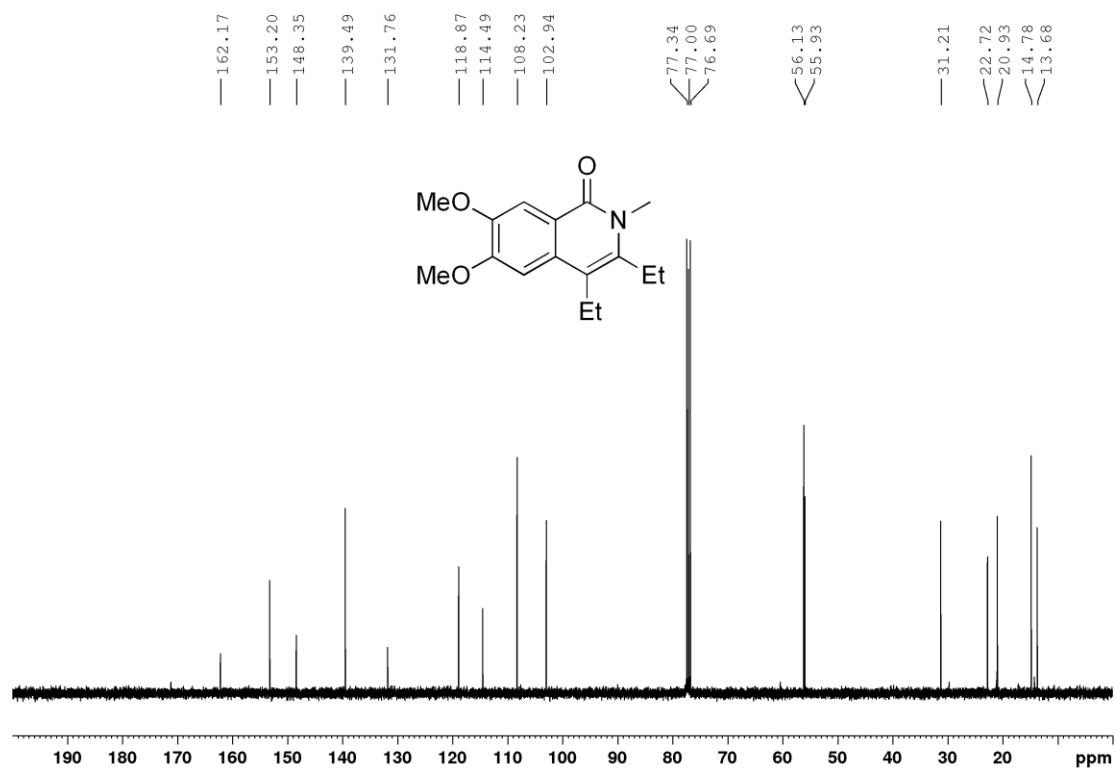

6,7-Dimethoxy-2-methyl-3,4-dipropylisoquinolin-1(2H)-one (3o) (400 MHz)

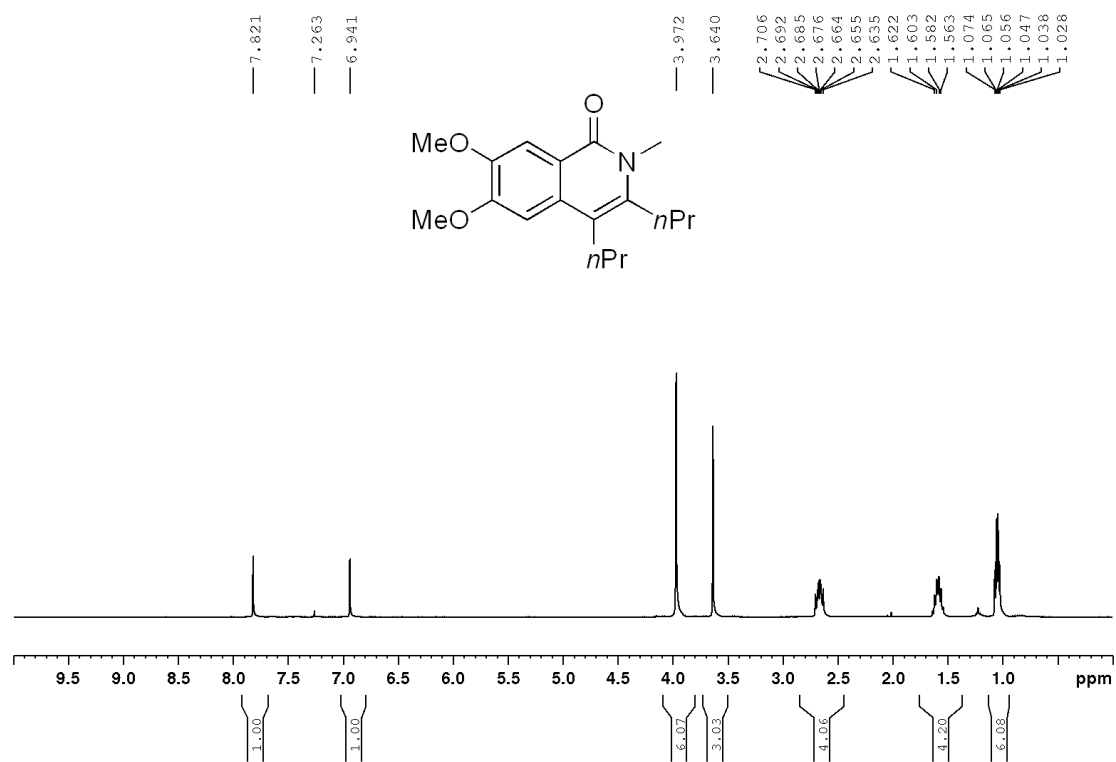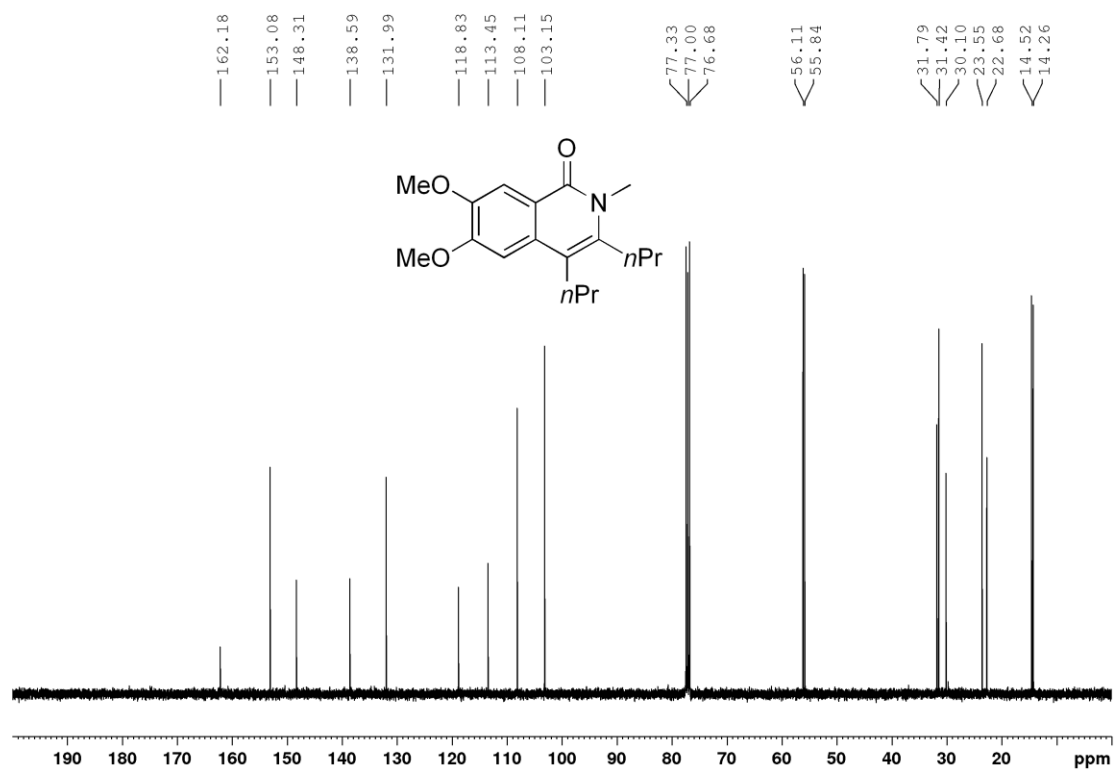



**6-Chloro-2-methyl-3,4-dipropylisoquinolin-1(2H)-one (3p) (400 MHz)**

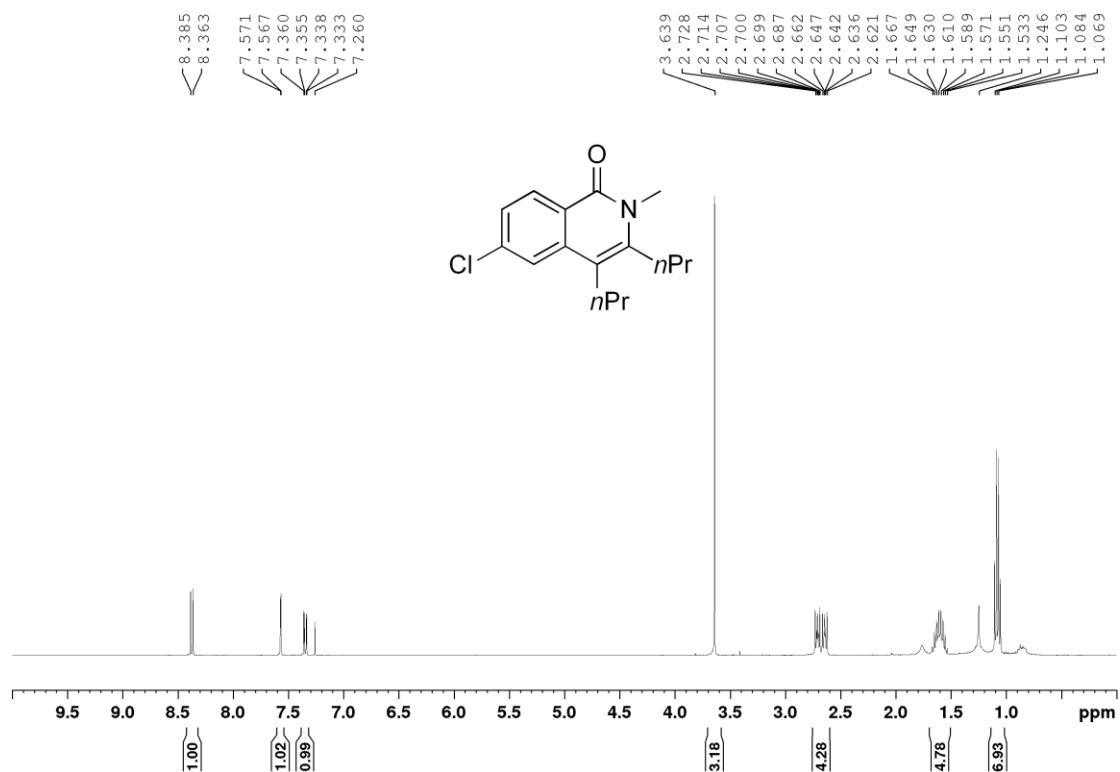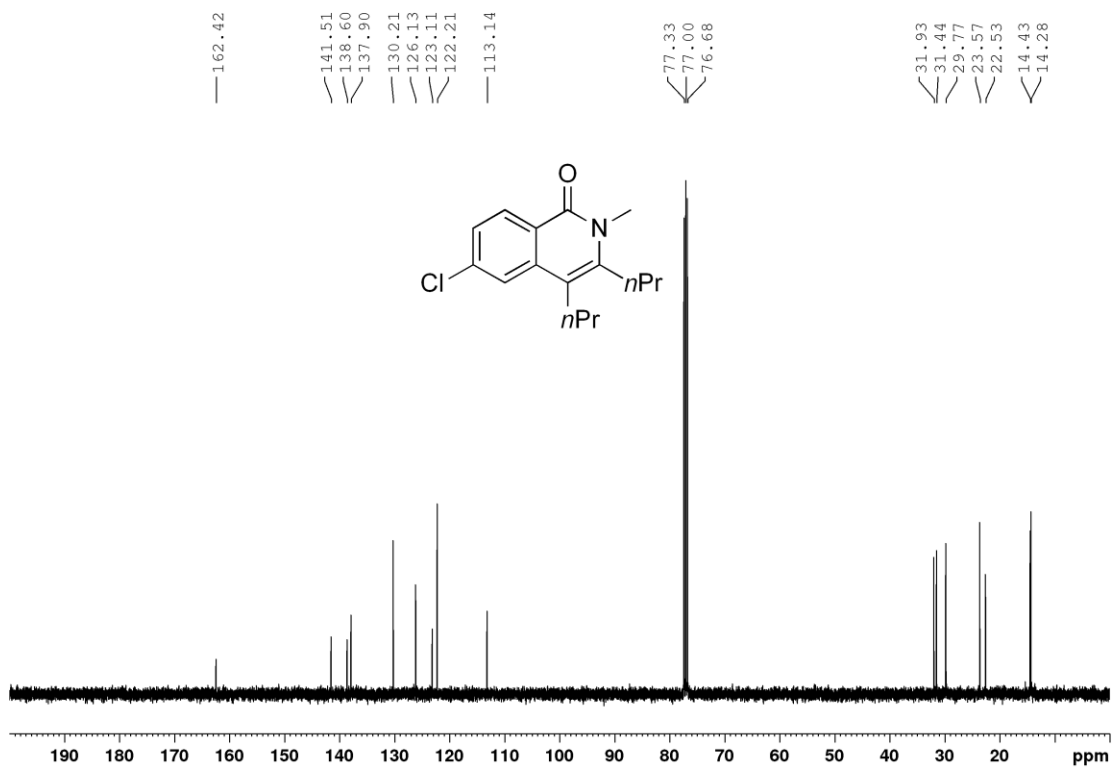

3,4-Diethyl-2-methyl-7-(trifluoromethyl)isoquinolin-1(2H)-one (3q) (400 MHz)

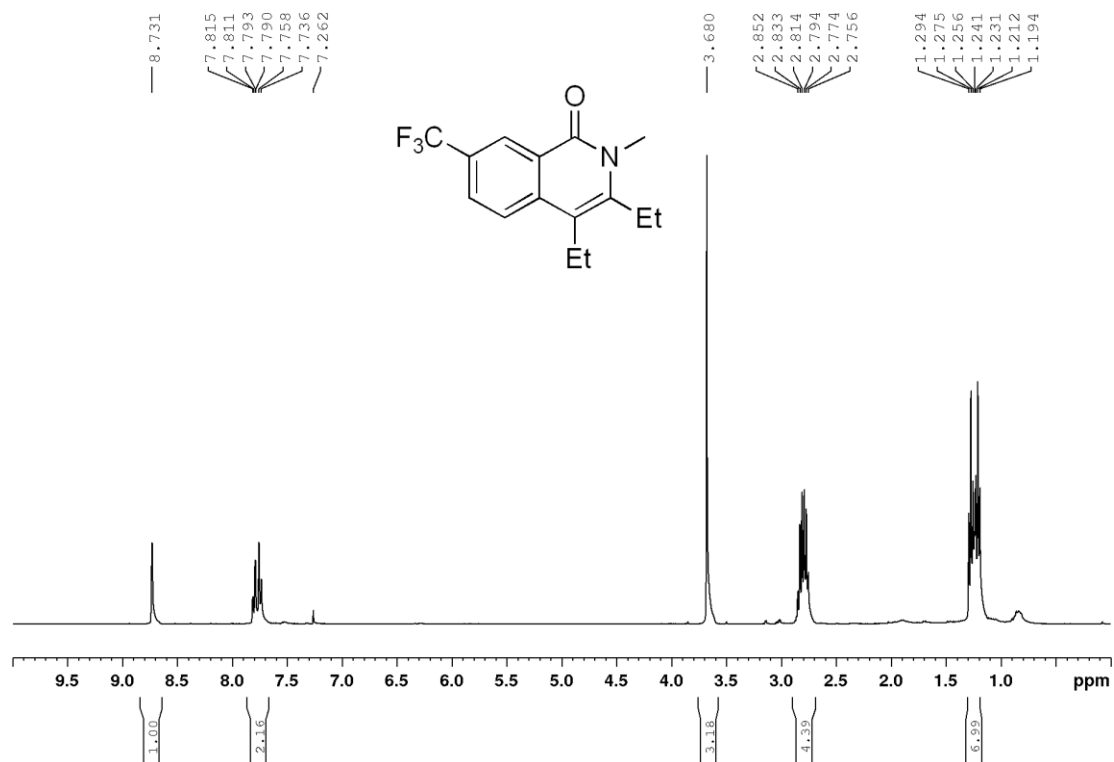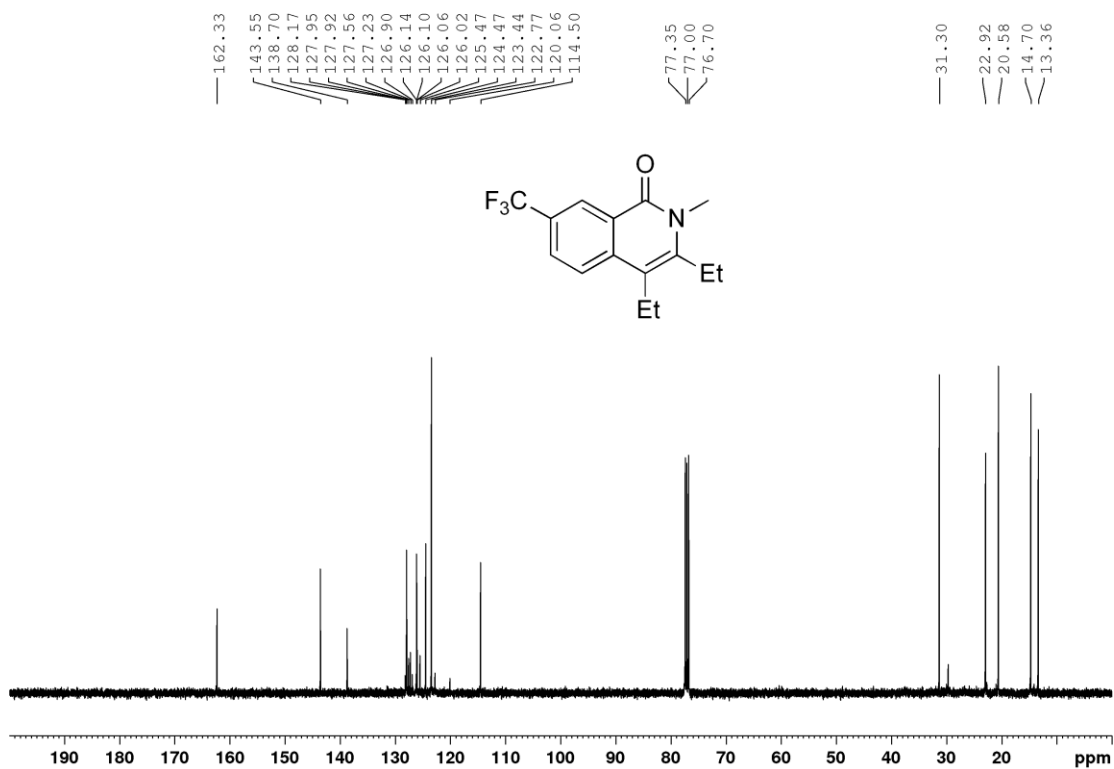

2,3,4-Triphenylisoquinolin-1(2H)-one (3r) (400 MHz)

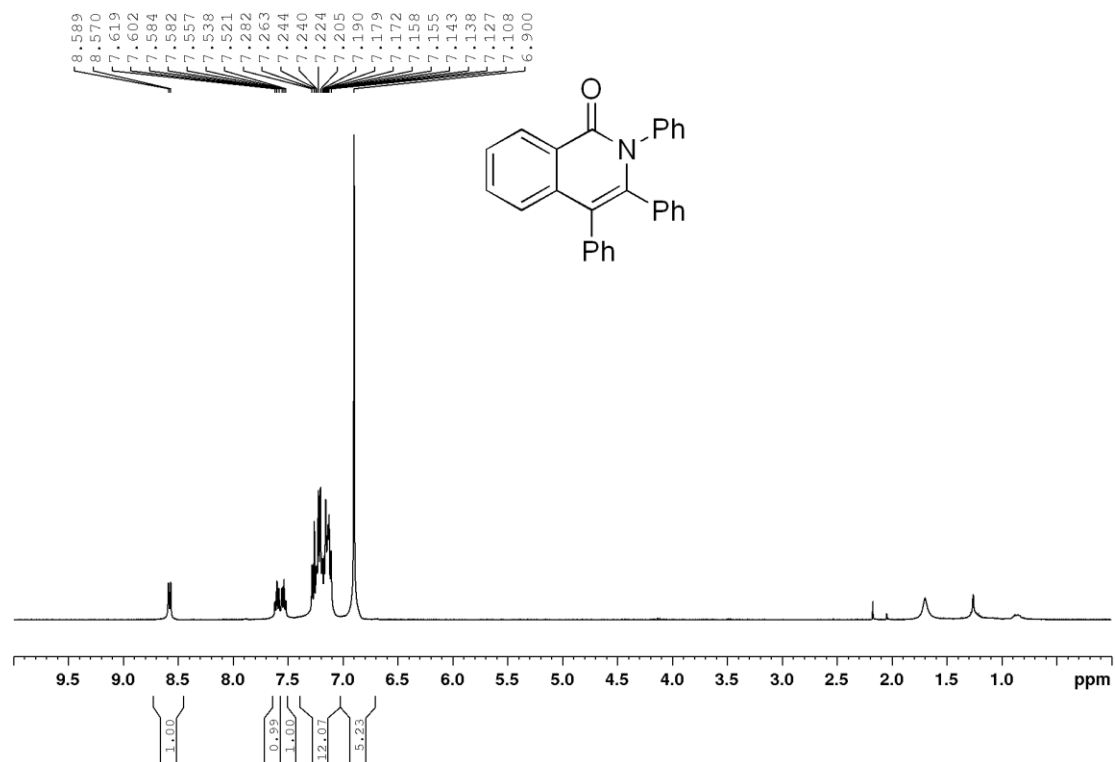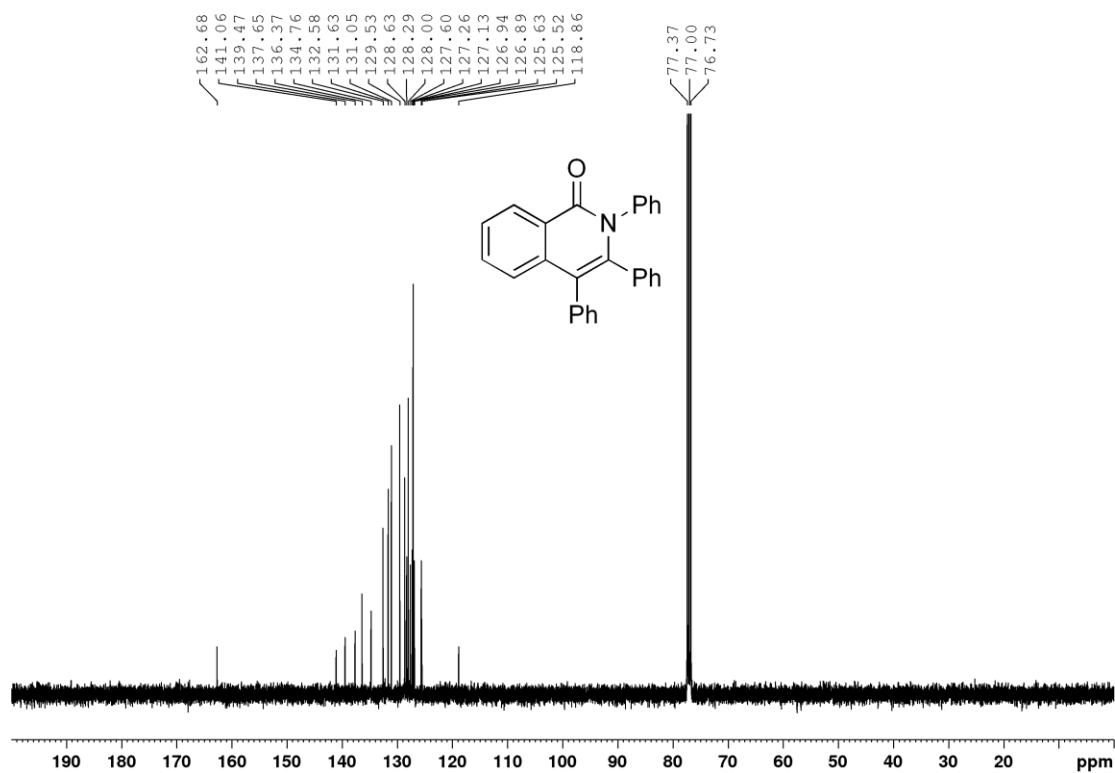

2-(4-Fluorophenyl)-3,4-diphenylisoquinolin-1(2H)-one (3s) (400 MHz)

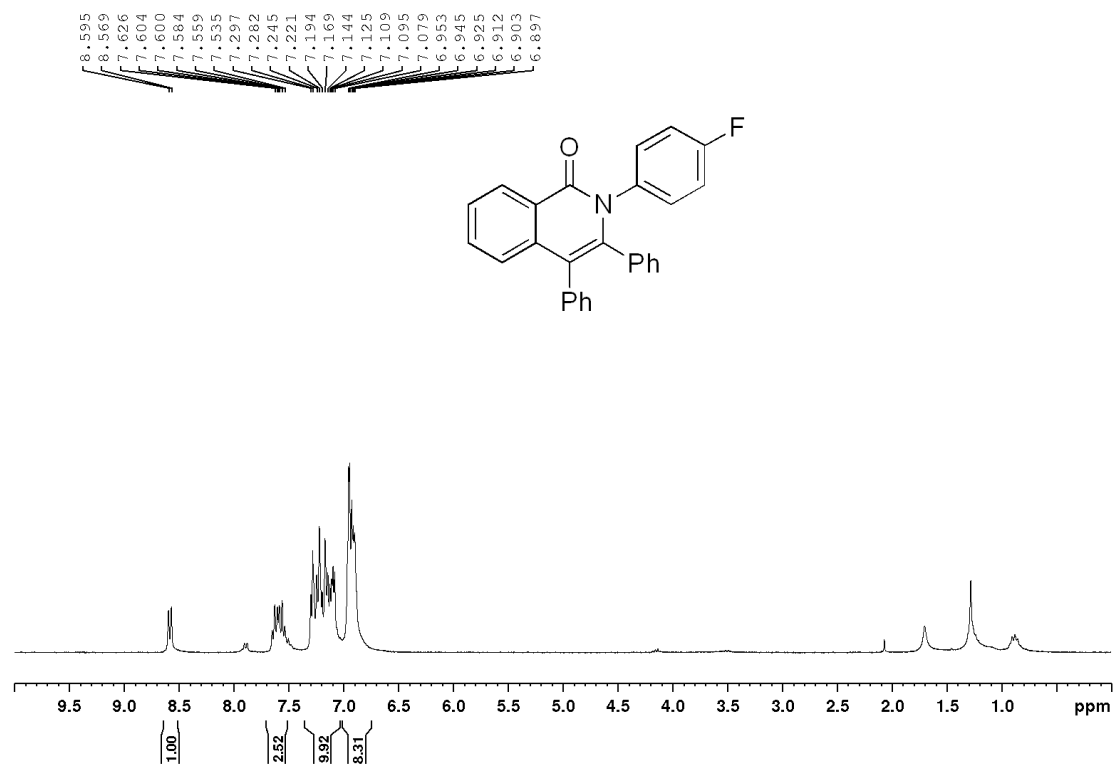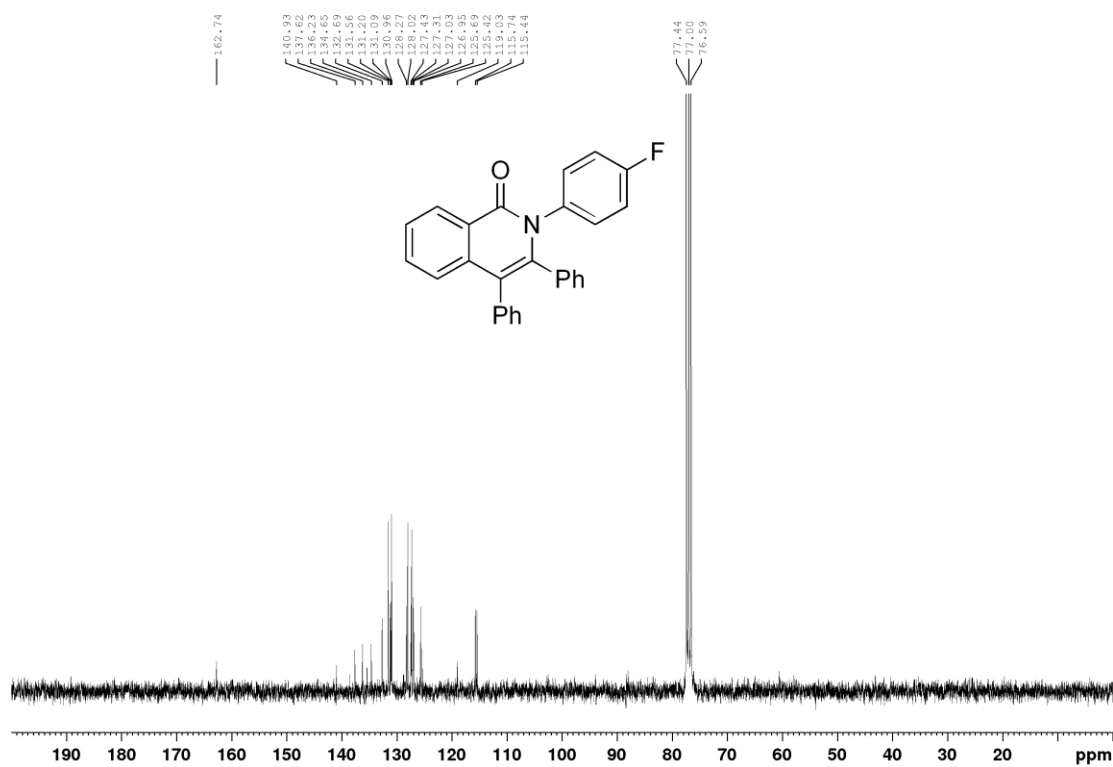

2-(Furan-2-ylmethyl)-3,4-diphenylisoquinolin-1(2H)-one (3t) (400 MHz)

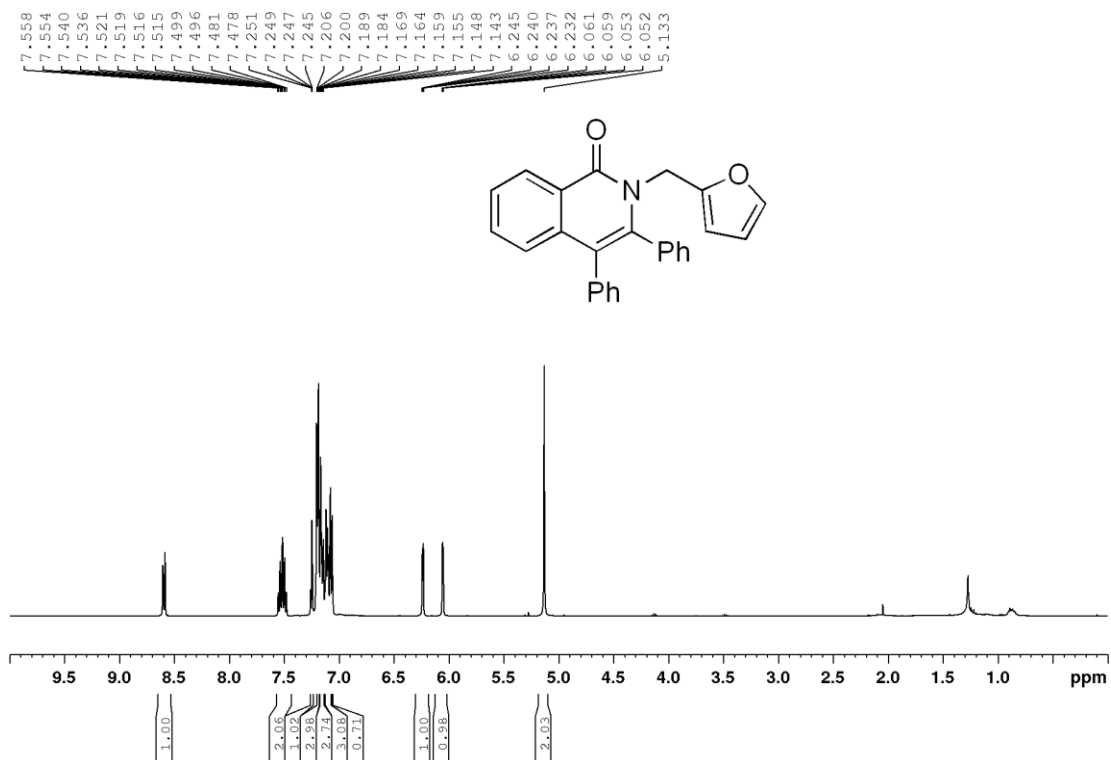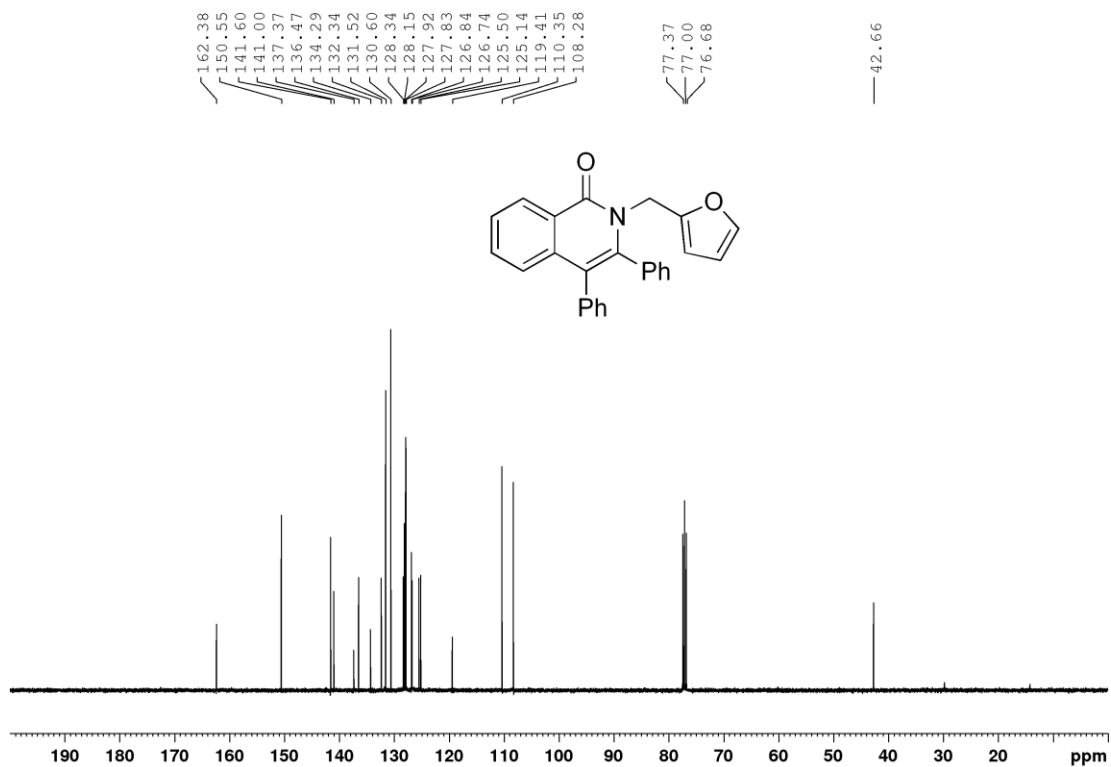

2,4-Dimethyl-3-phenylisoquinolin-1(2H)-one (3u) (400 MHz)

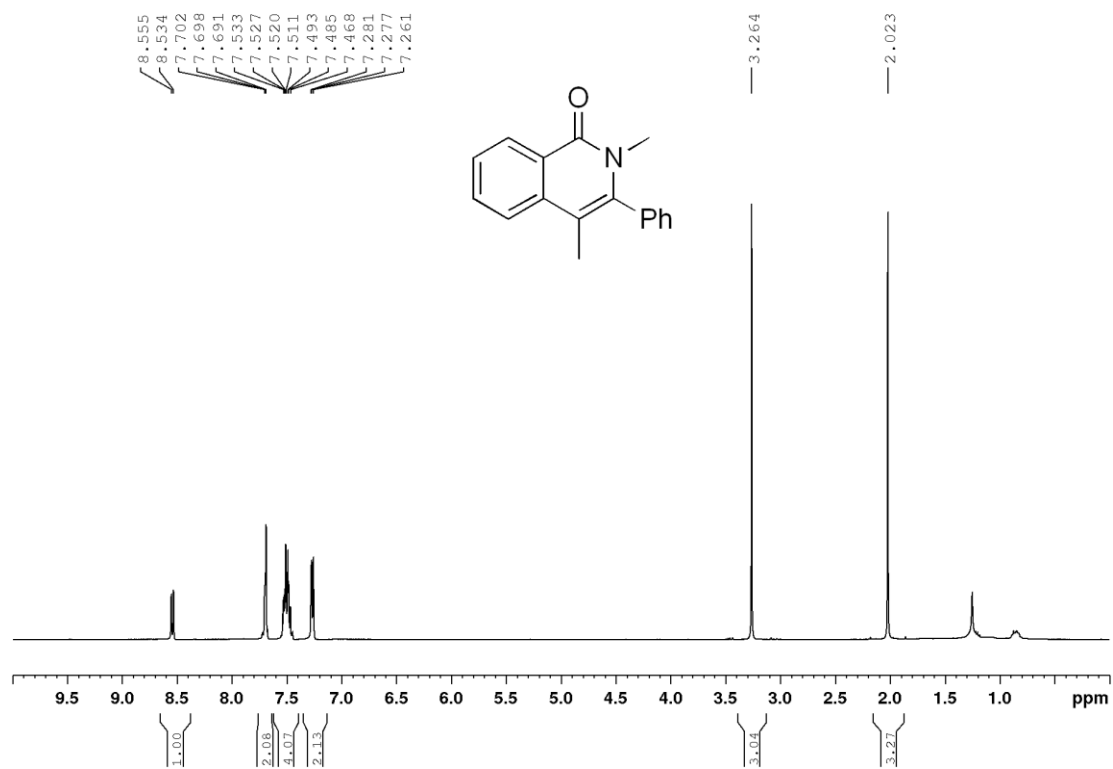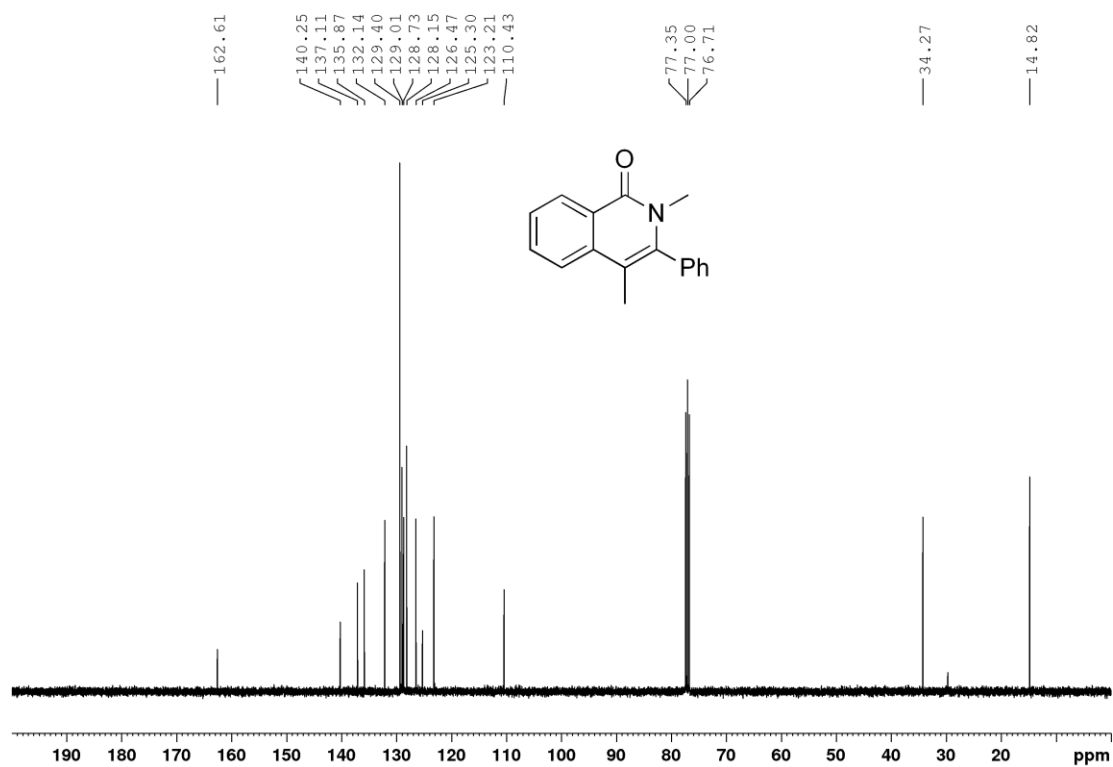

4-Ethyl-2-methyl-3-phenylisoquinolin-1(2H)-one (3v) (400 MHz)

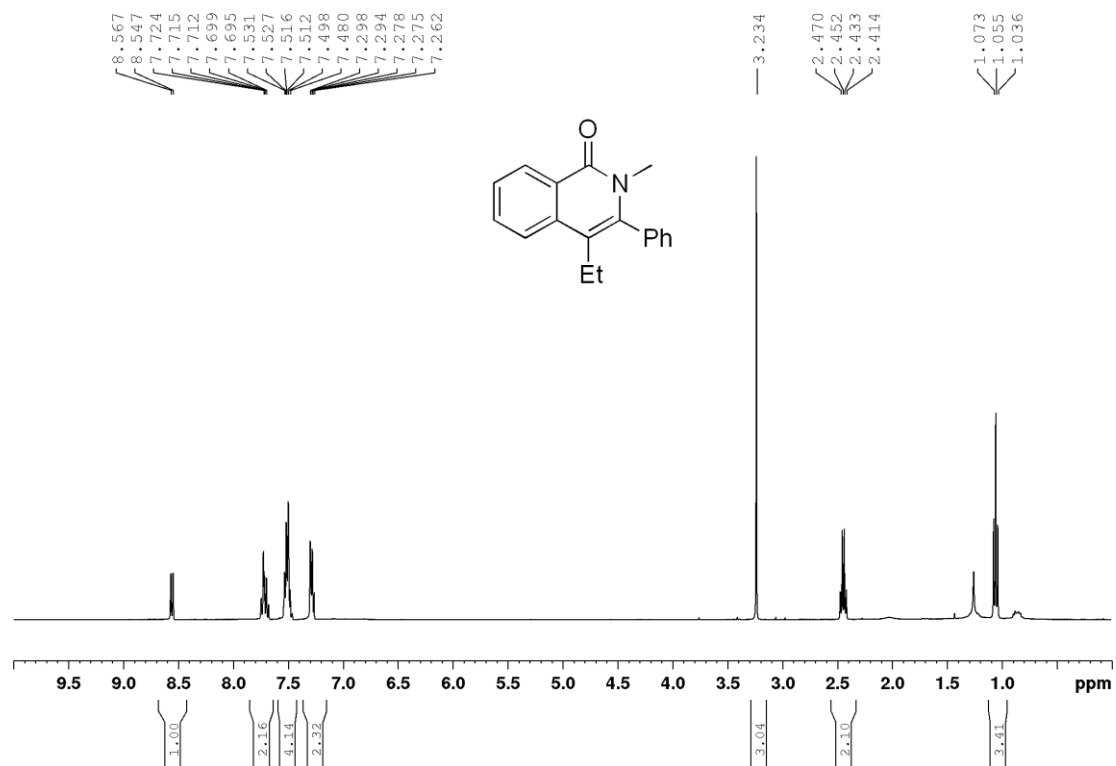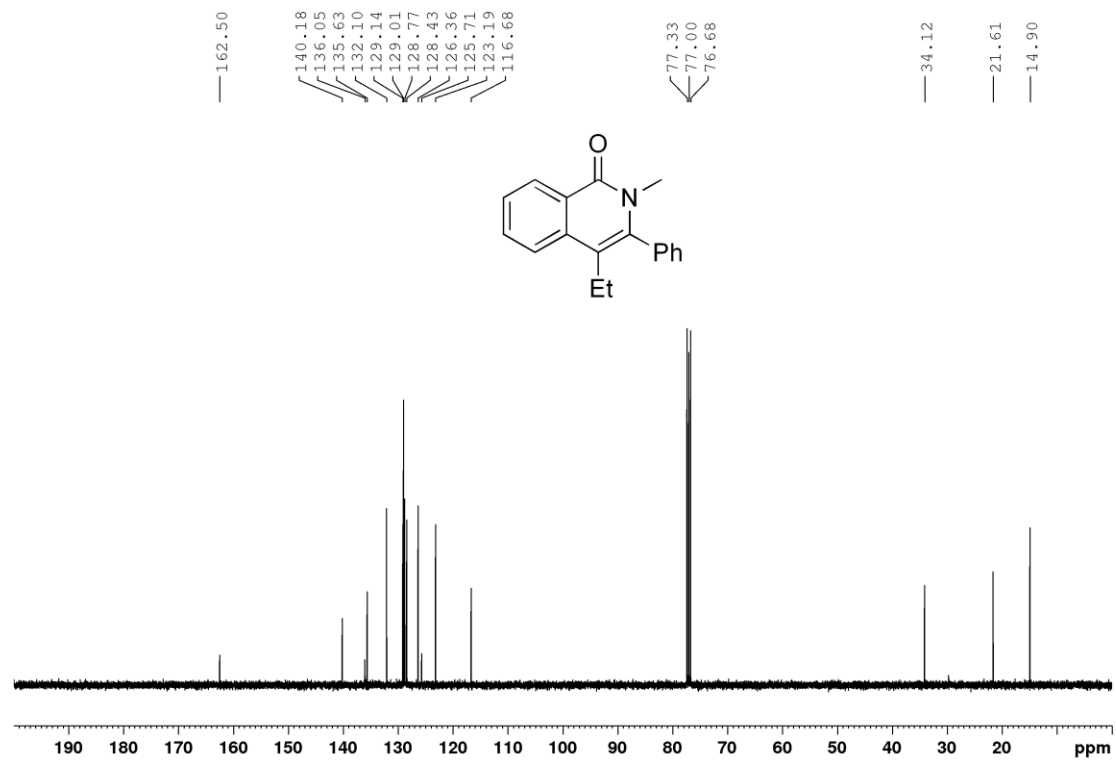

2-Methyl-3-phenyl-4-(trimethylsilyl)isoquinolin-1(2H)-one (3w) (600 MHz)

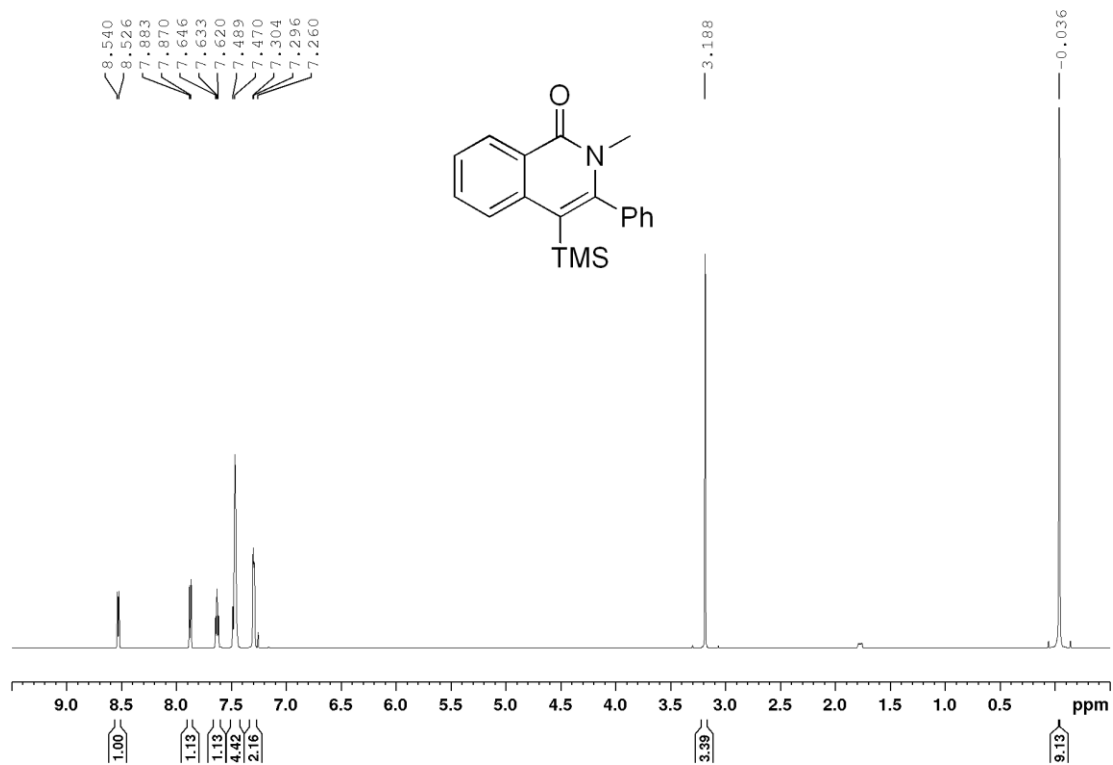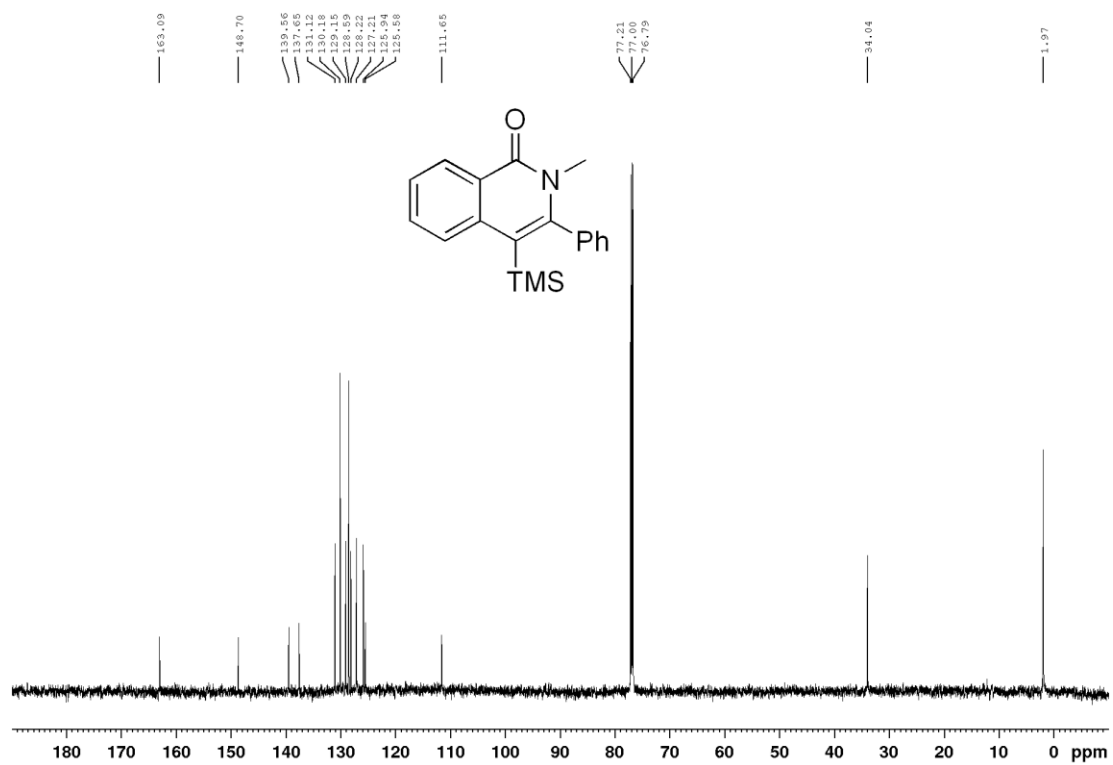



2,6-Dimethyl-3-phenyl-4-(trimethylsilyl)isoquinolin-1(2H)-one (3x) (600 MHz)

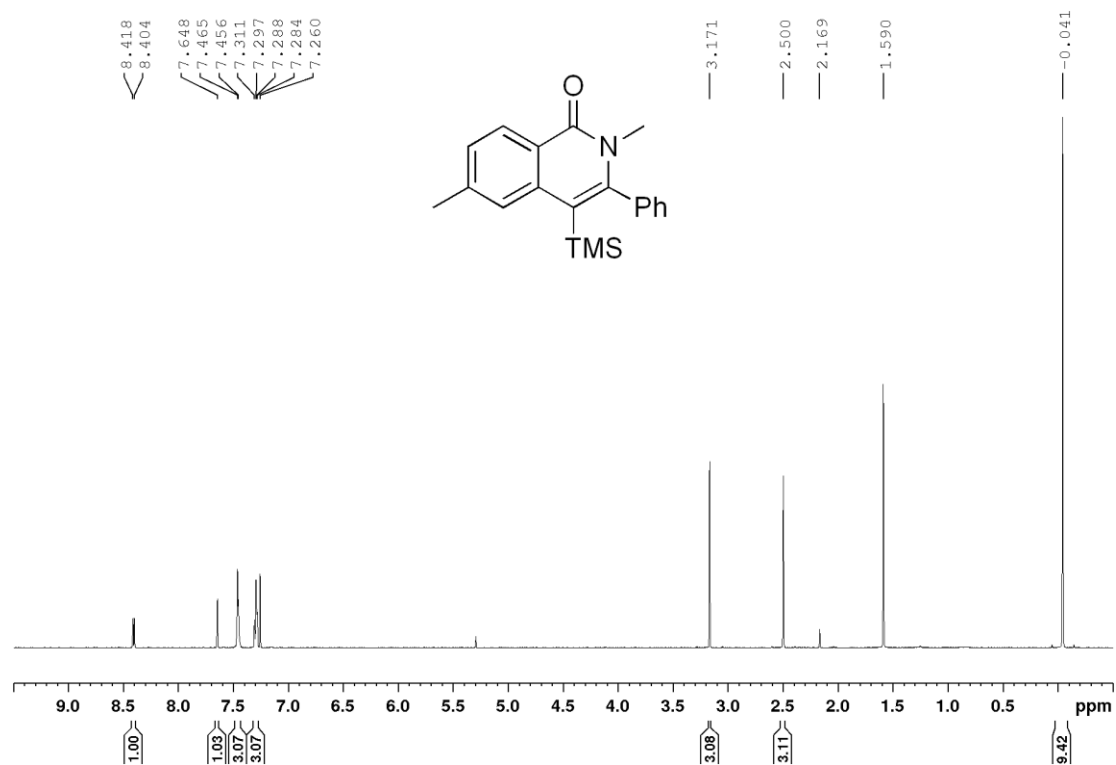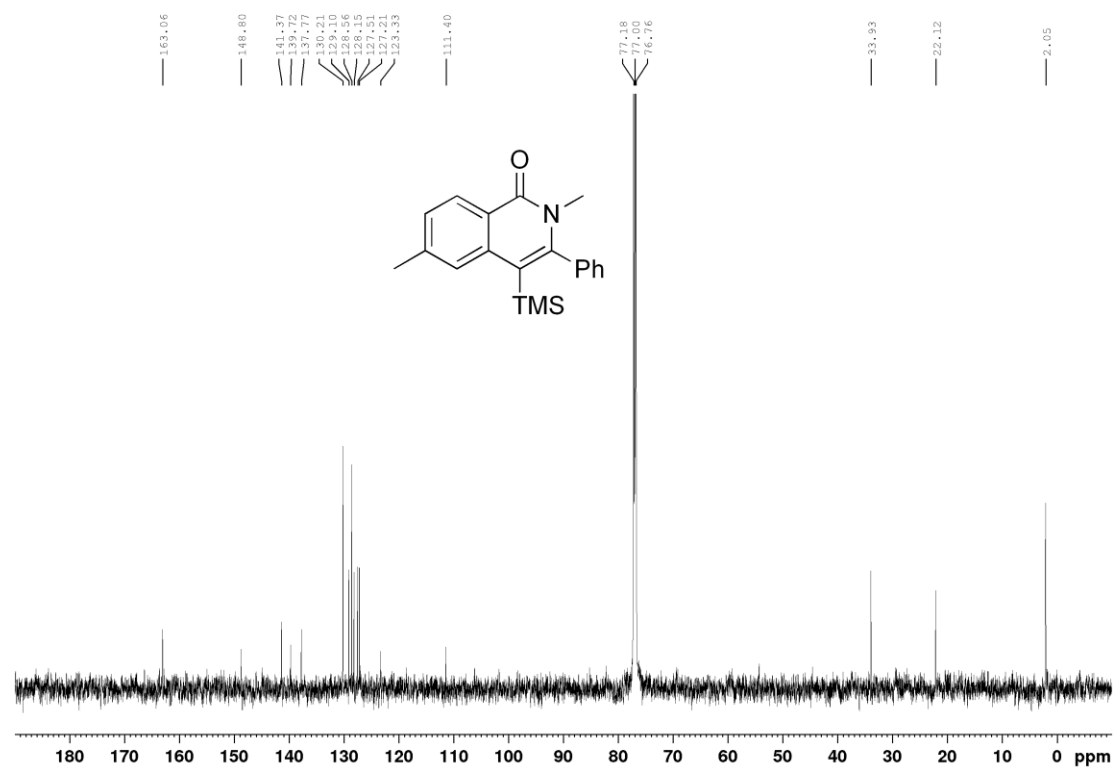

**(E)-2-(1,2-Diphenylvinyl)-N-methylbenzamide (4a) (600 MHz)**

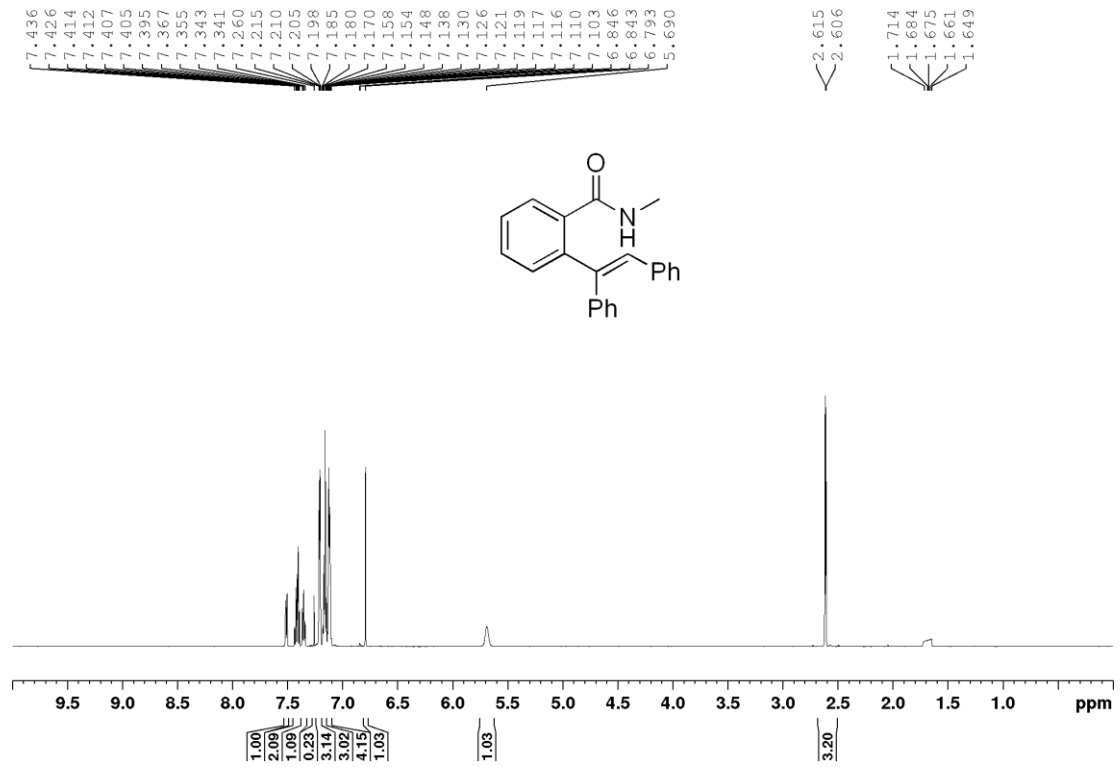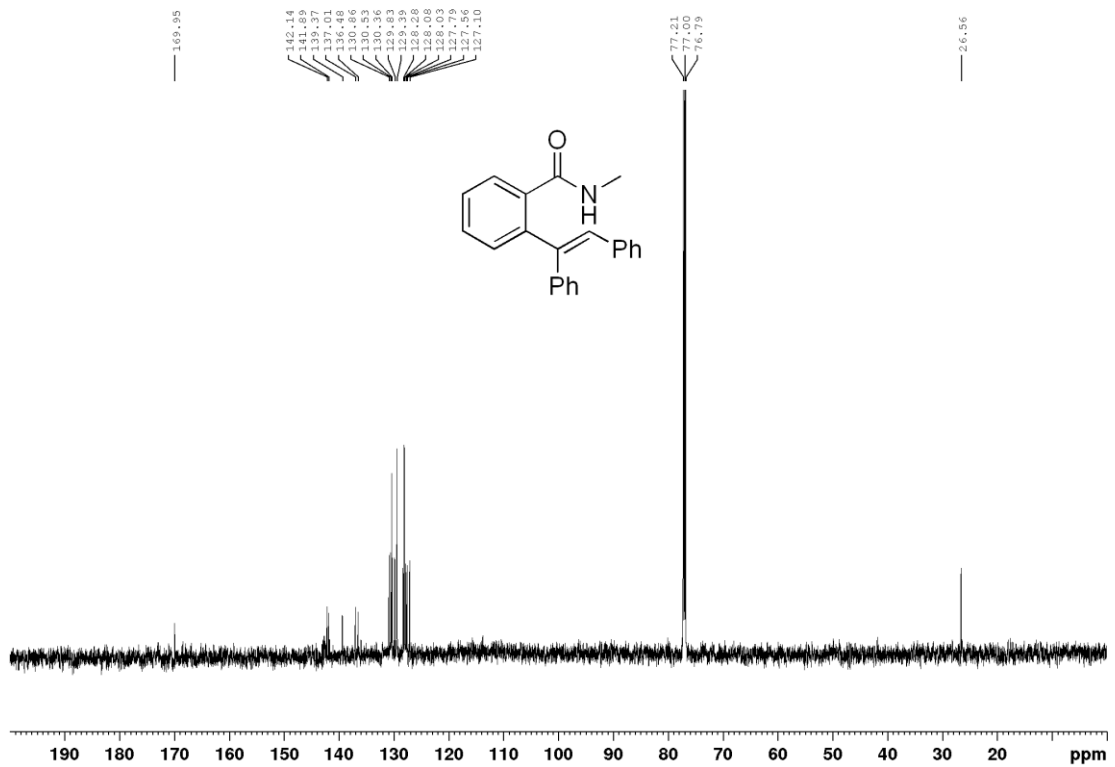

**(E)-2-(1,2-Diphenylvinyl)-5-methoxy-N-methylbenzamide (4b) (600 MHz)**

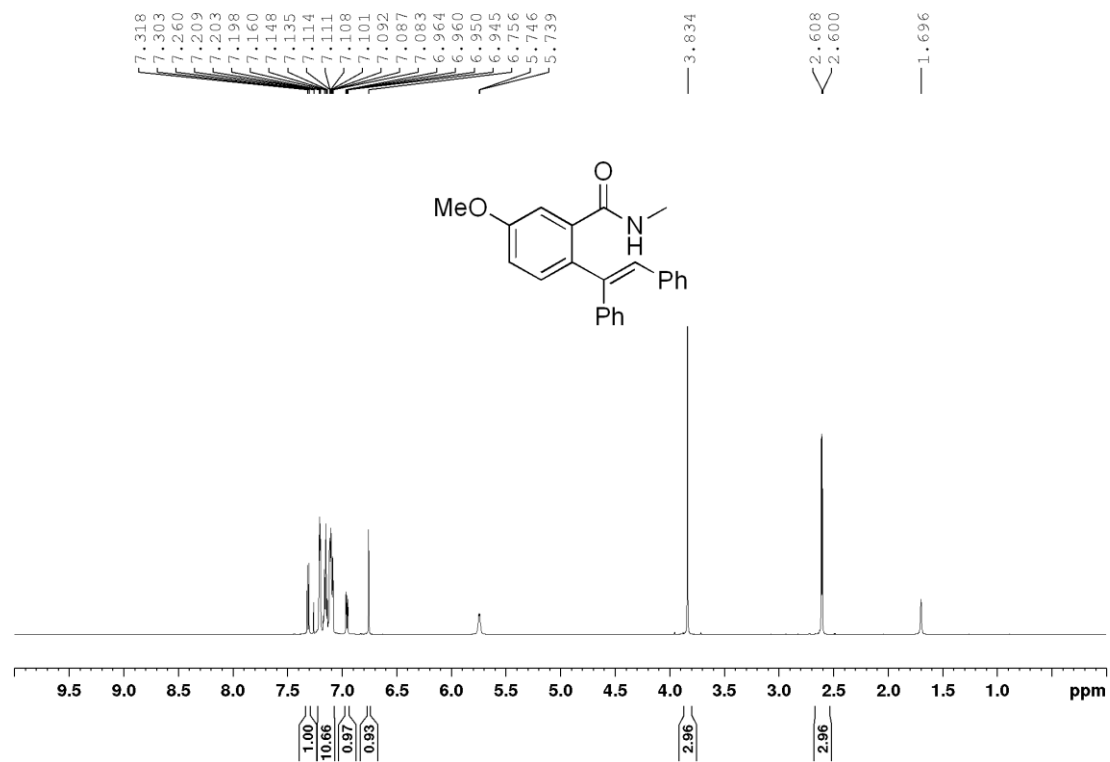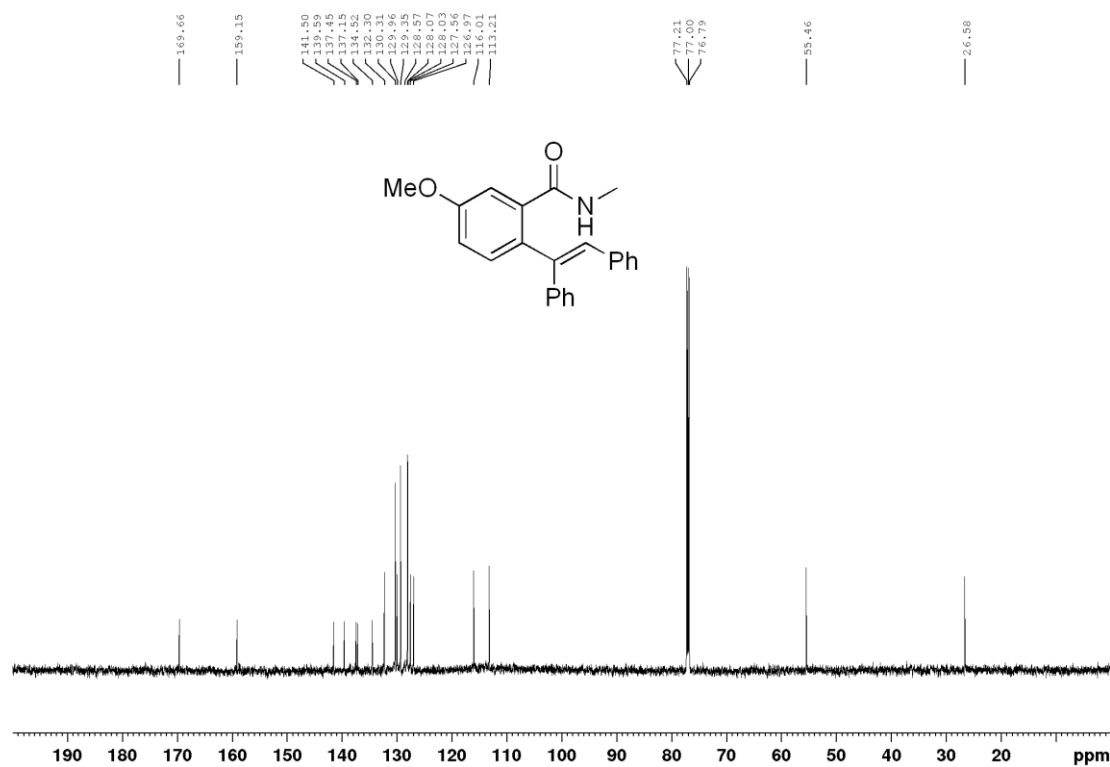

**(E)-2-(1,2-Diphenylvinyl)-4,5-dimethoxy-N-methylbenzamide (4c) (600 MHz)**

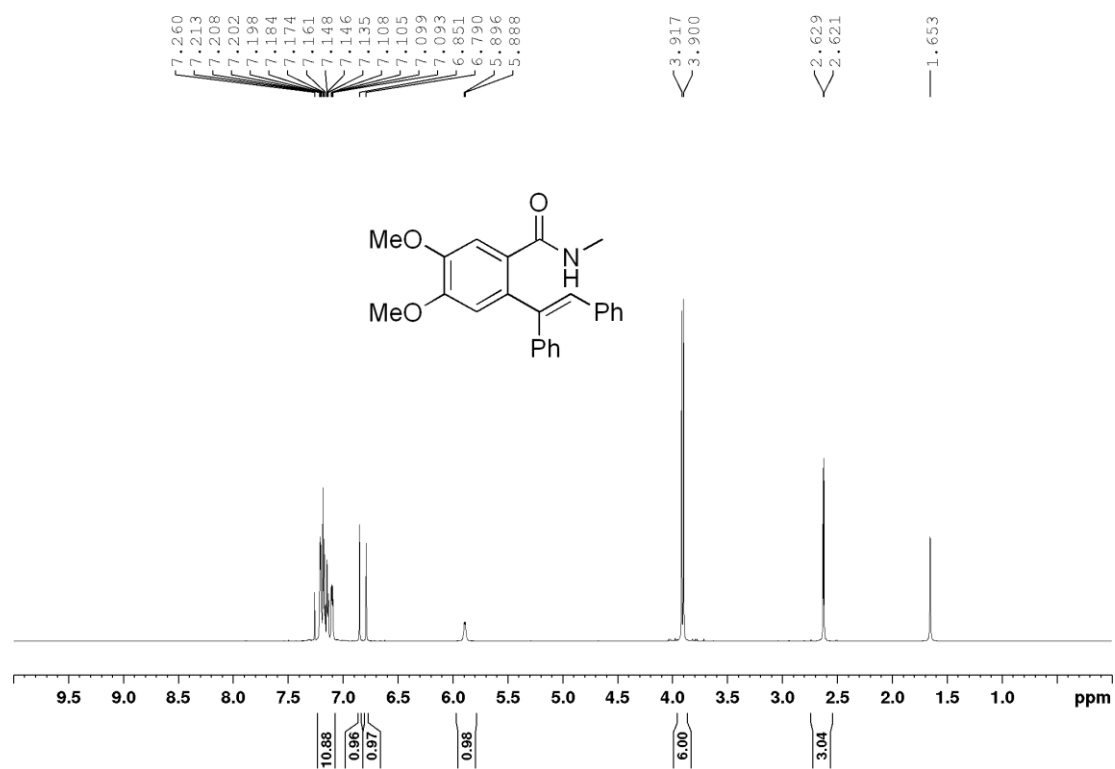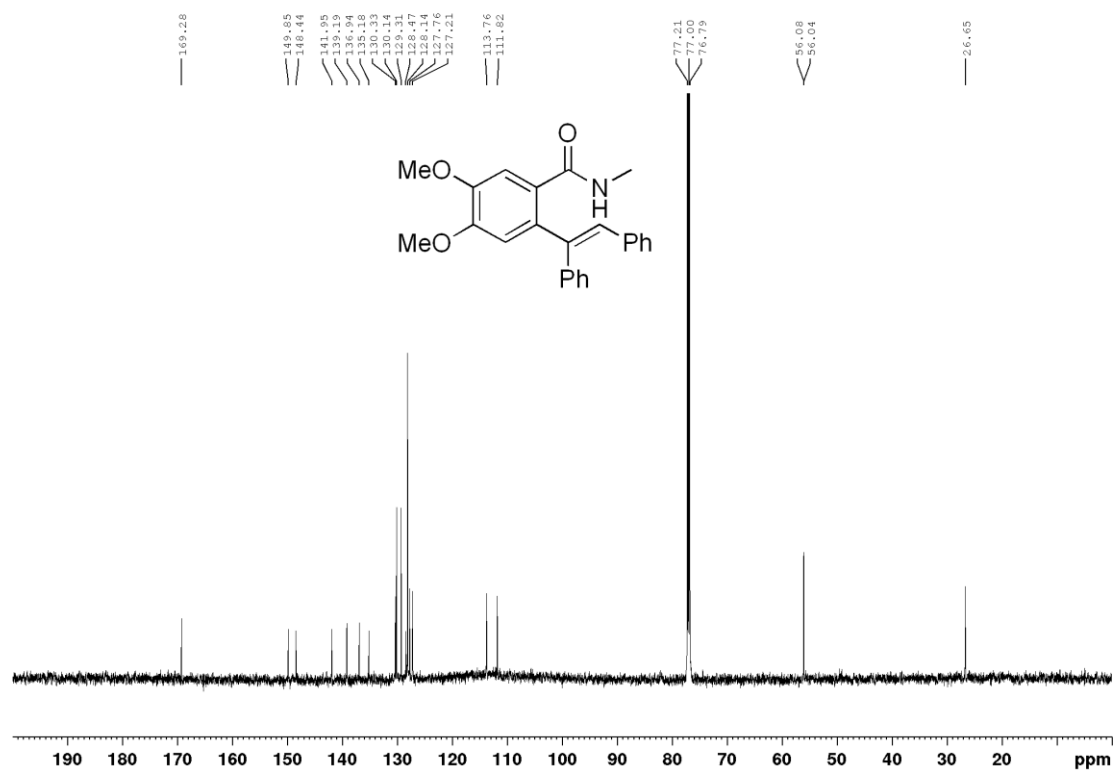

**(E)-2-(1,2-Diphenylvinyl)-N,4-dimethylbenzamide (4d) (600 MHz)**

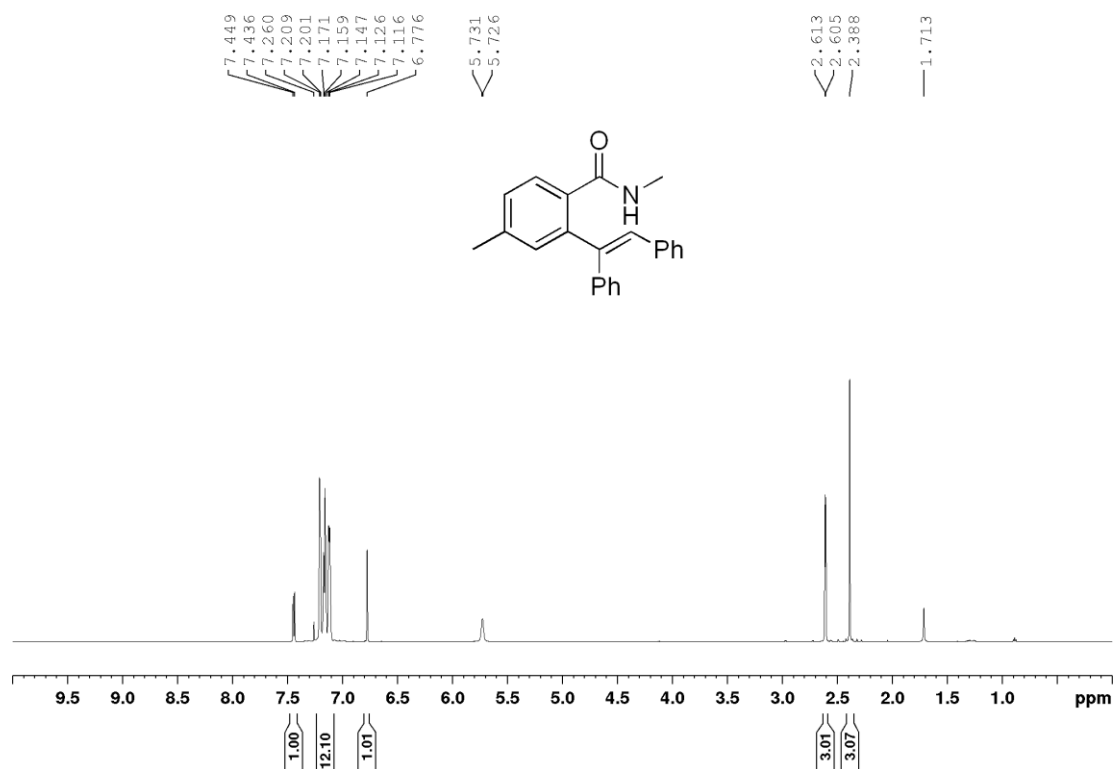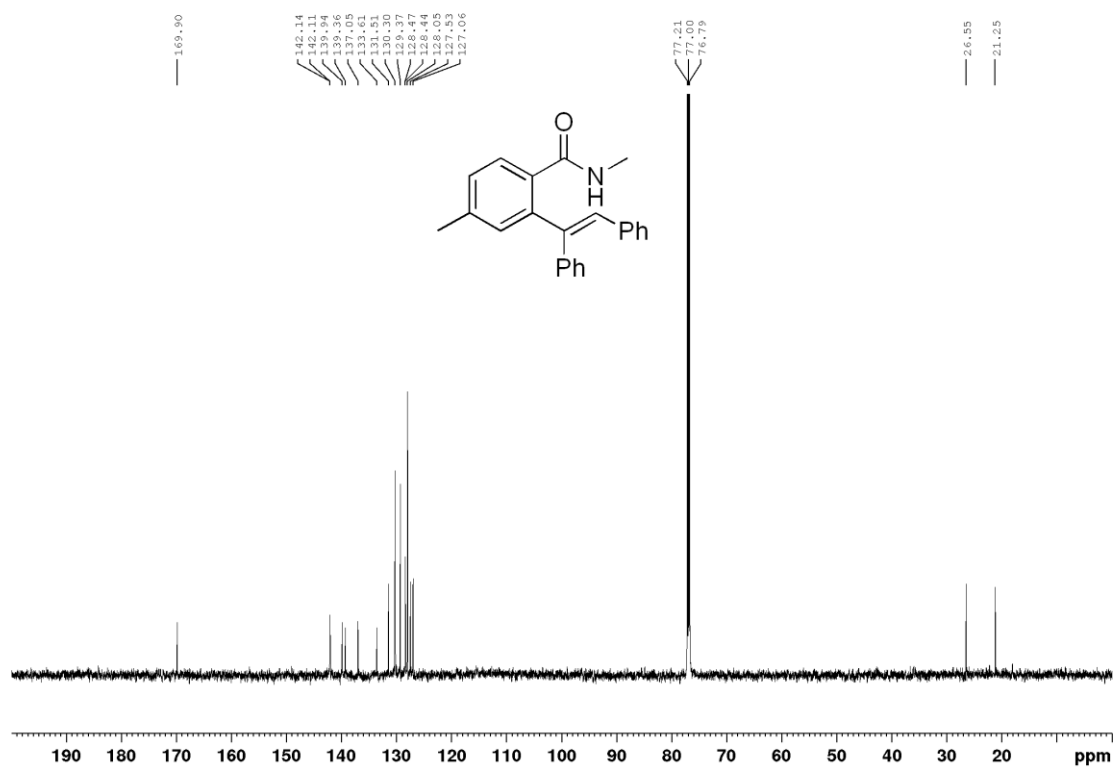

**(E)-2-(1,2-Diphenylvinyl)-N,3-dimethylbenzamide (4e) (600 MHz)**

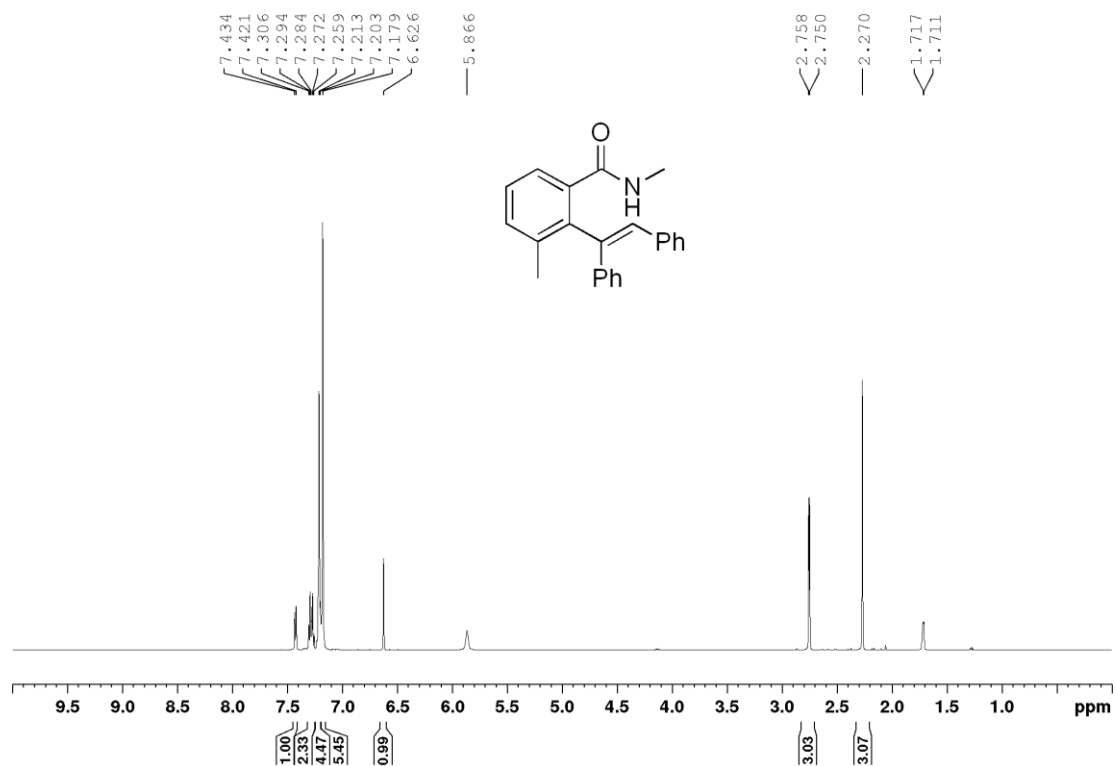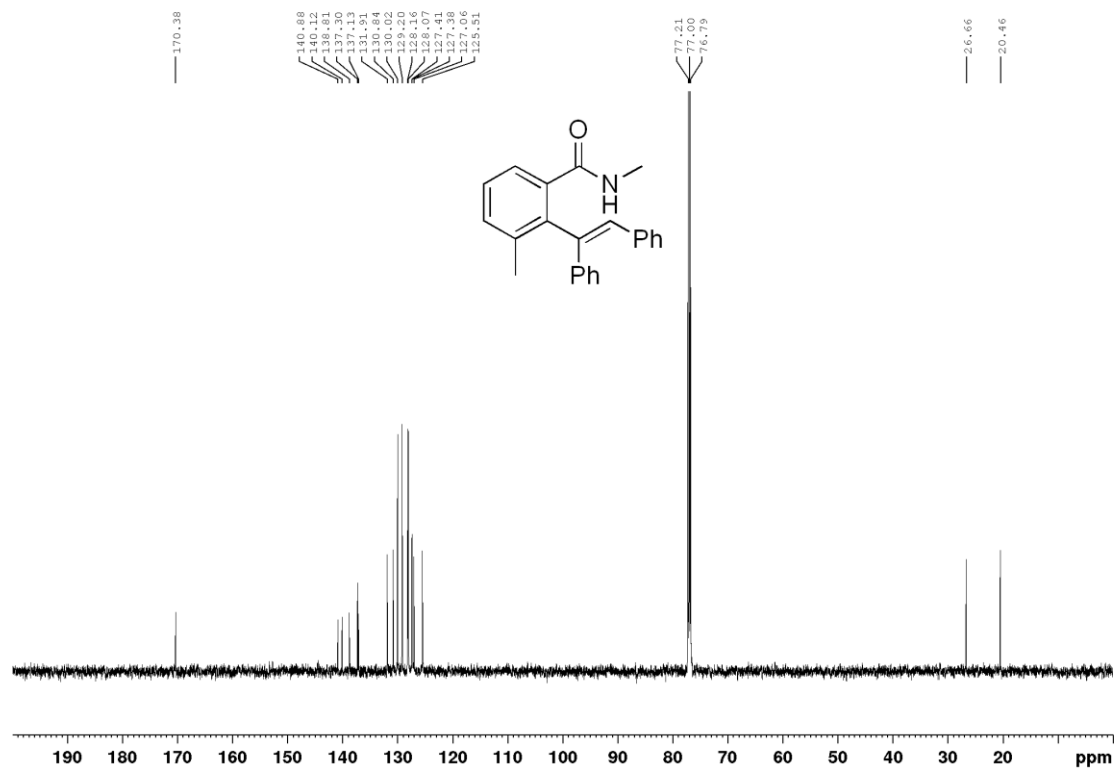

**(E)-4-Chloro-2-(1,2-diphenylvinyl)-N-methylbenzamide (4f) (600 MHz)**

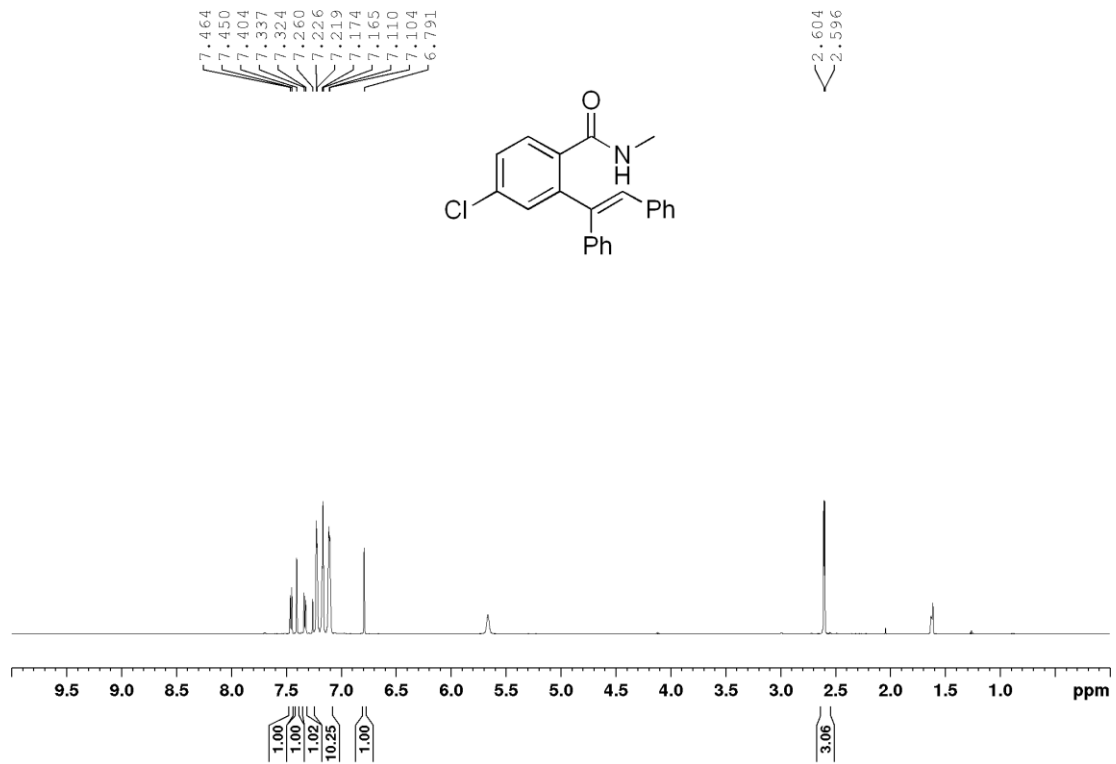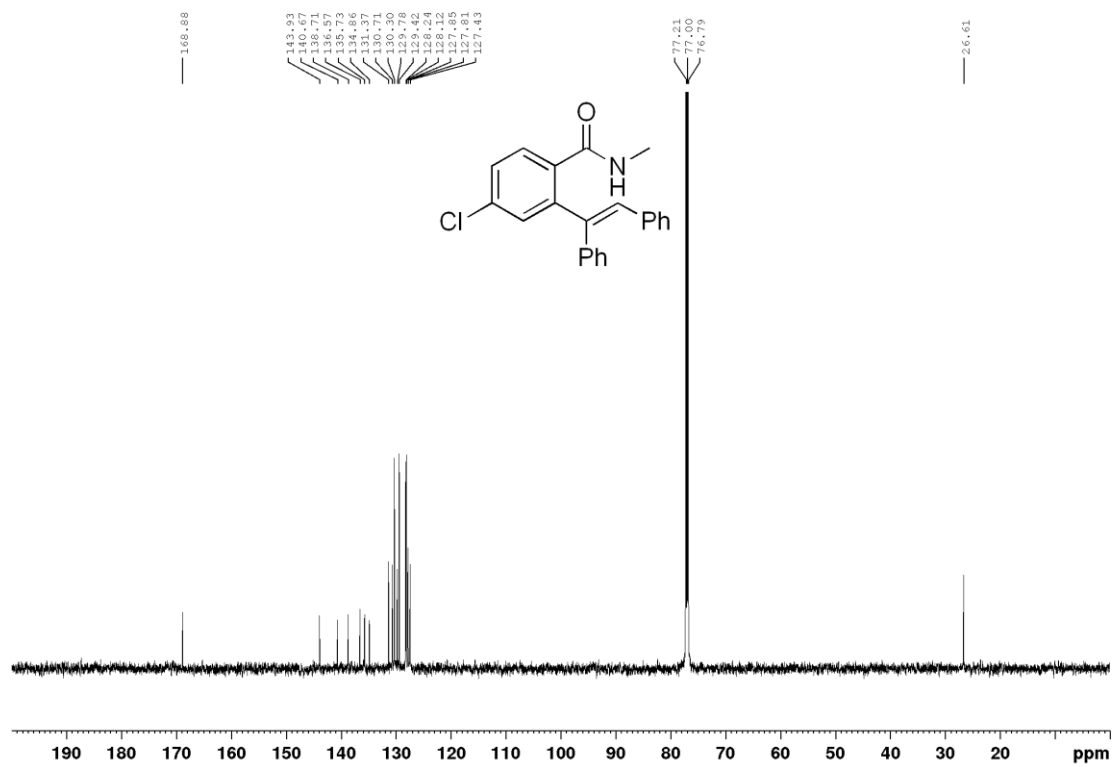

**(E)-2-(1,2-diphenylvinyl)-N-methyl-5-(trifluoromethyl)benzamide (4g)** [ $^1\text{H}$  NMR (600 MHz,  $\text{C}_6\text{D}_6$ );  $^{13}\text{C}$  NMR (300 MHz,  $\text{CDCl}_3$ )]

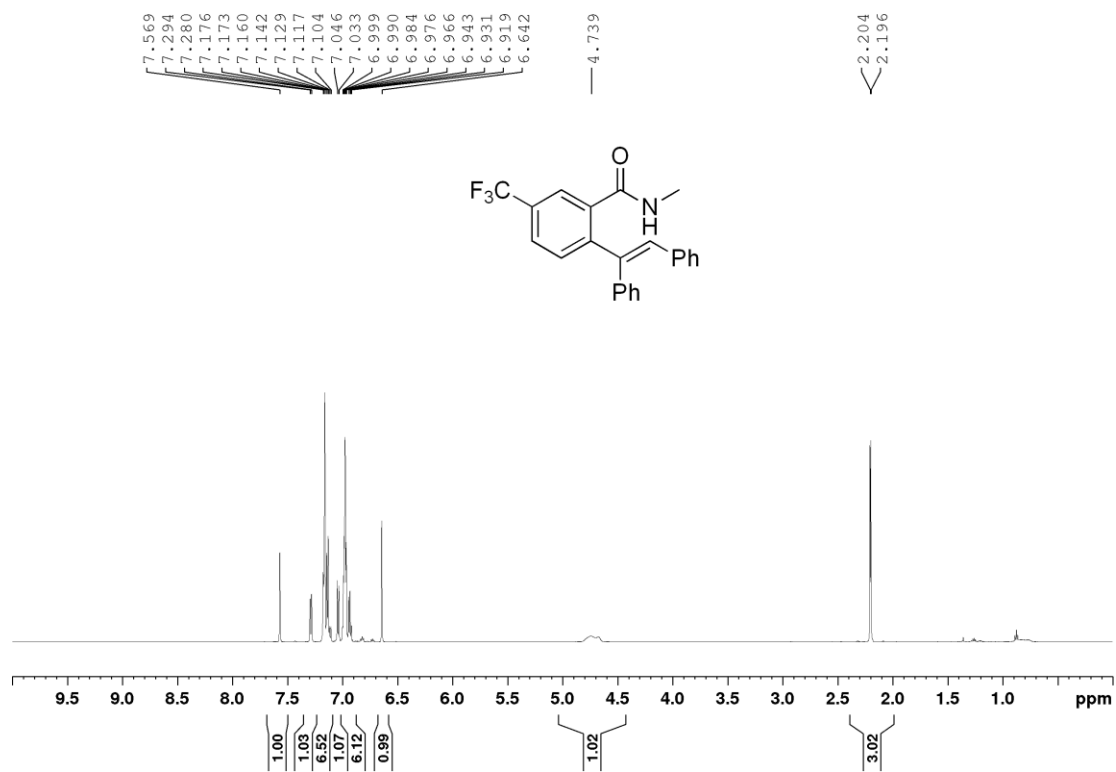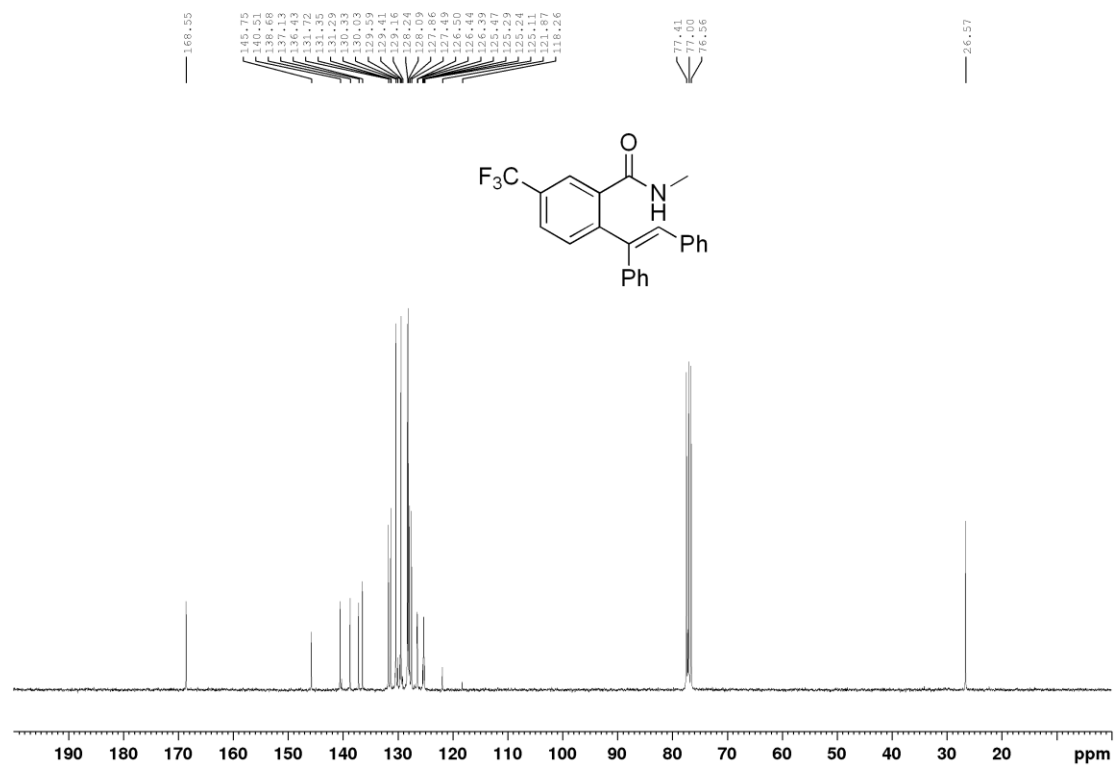



**(E)-3-(1,2-Diphenylvinyl)-N-methylthiophene-2-carboxamide (4h) (600 MHz)**

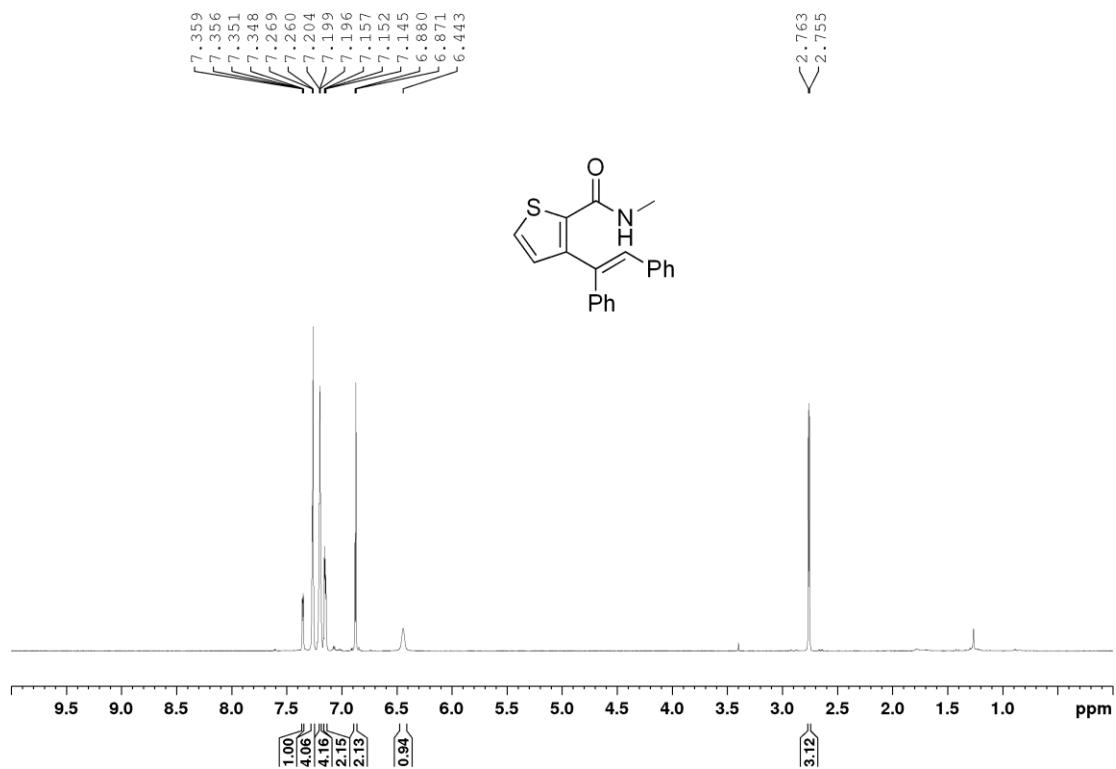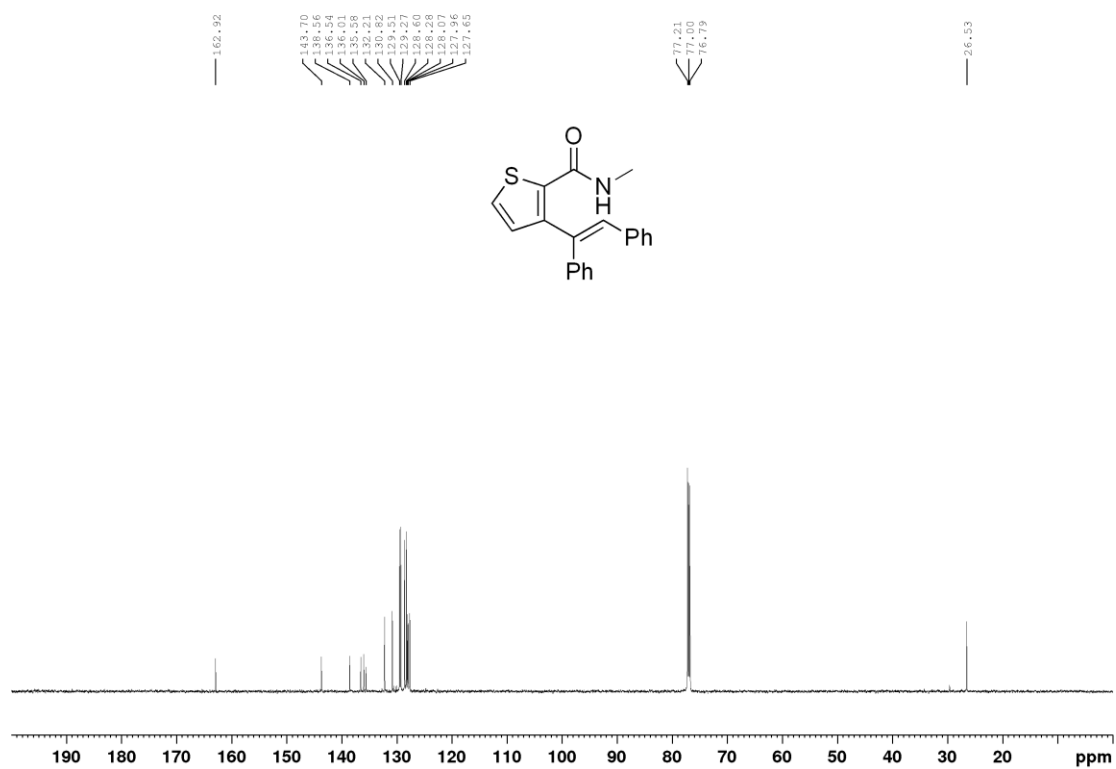

**(E)-2-(But-2-en-2-yl)-N-methylbenzamide (4i) (600 MHz)**

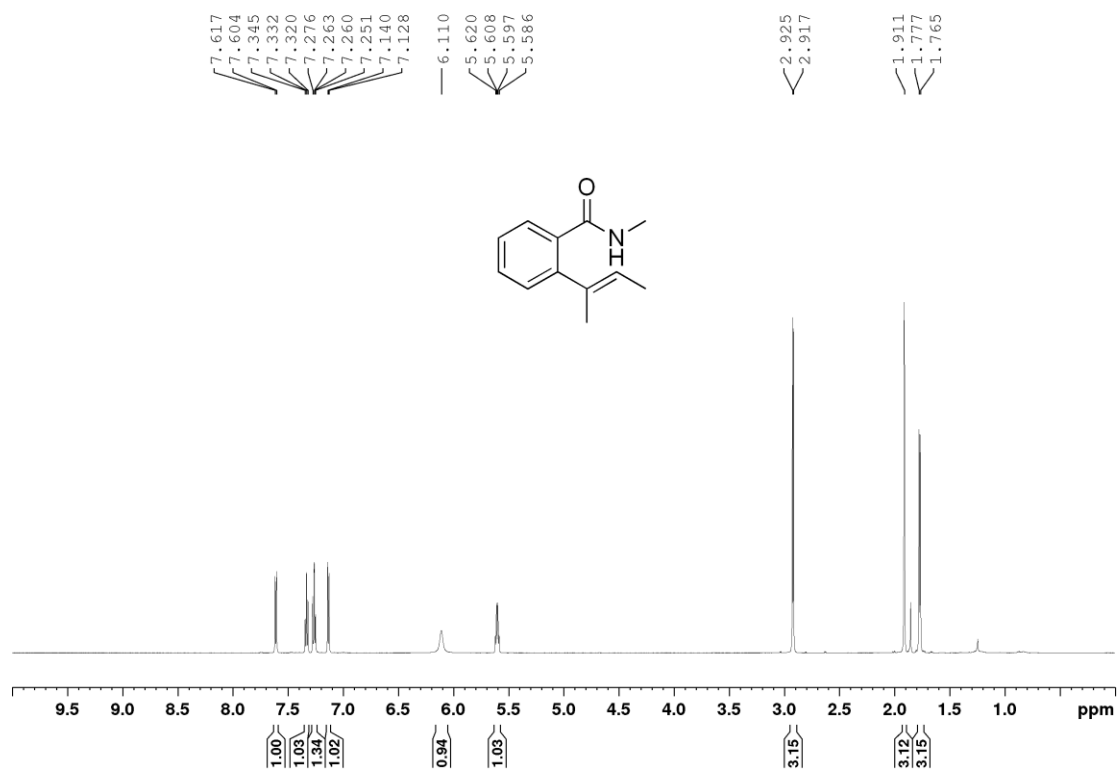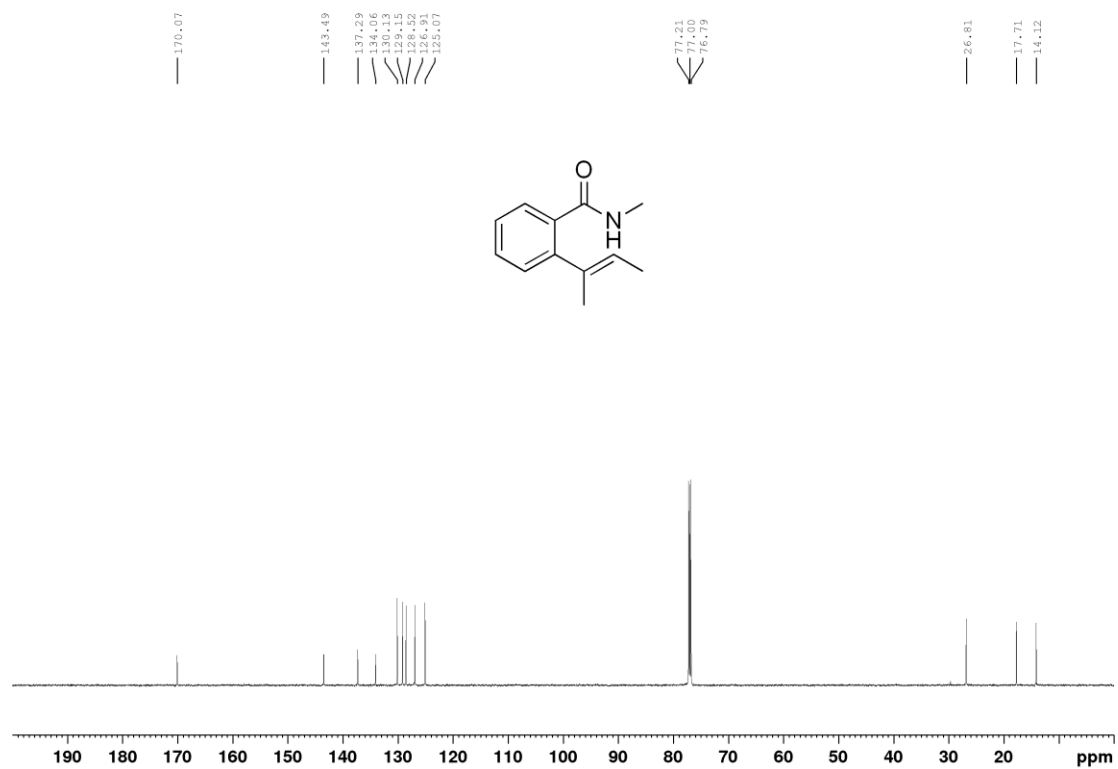

**(E)-2-(Hex-3-en-3-yl)-N-methylbenzamide (4j) (600 MHz)**

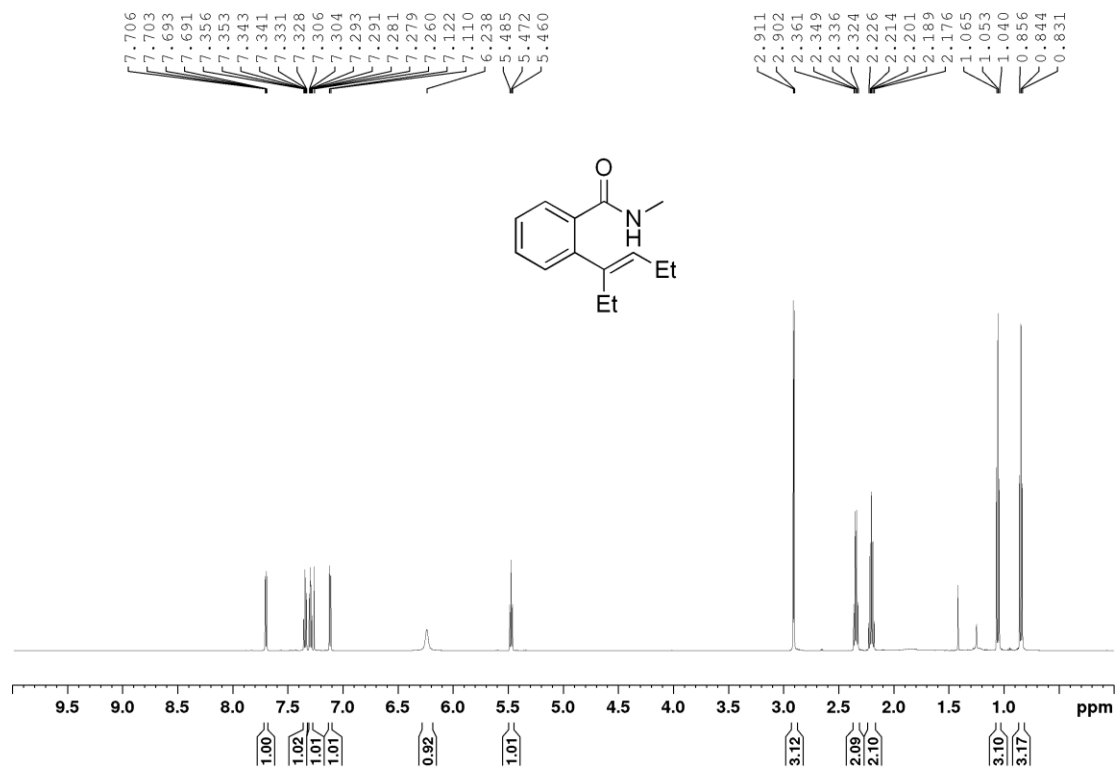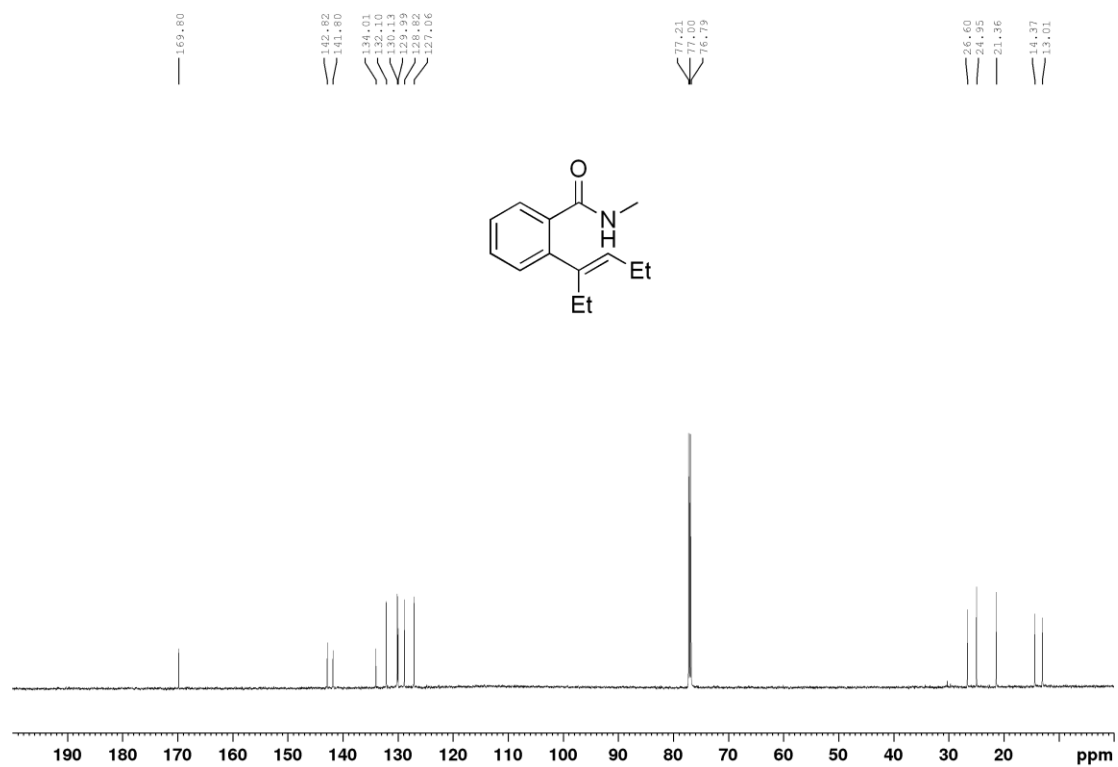

**(E)-N-Methyl-2-(oct-4-en-4-yl)benzamide (4k) (600 MHz)**

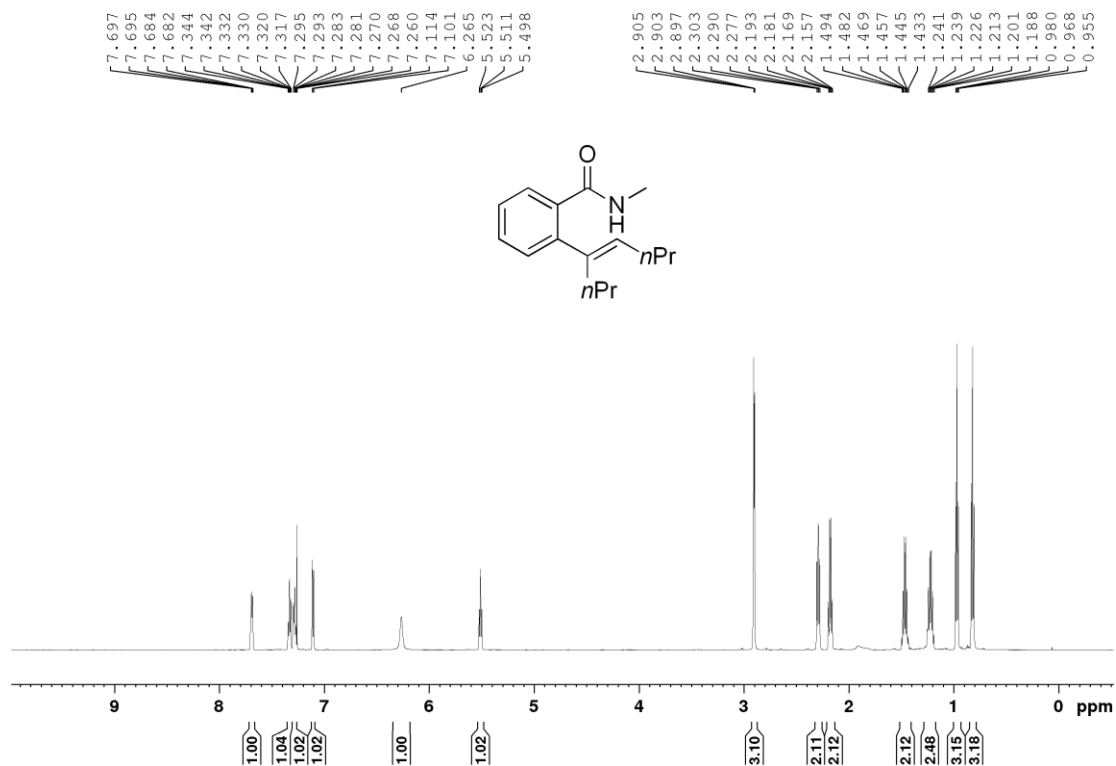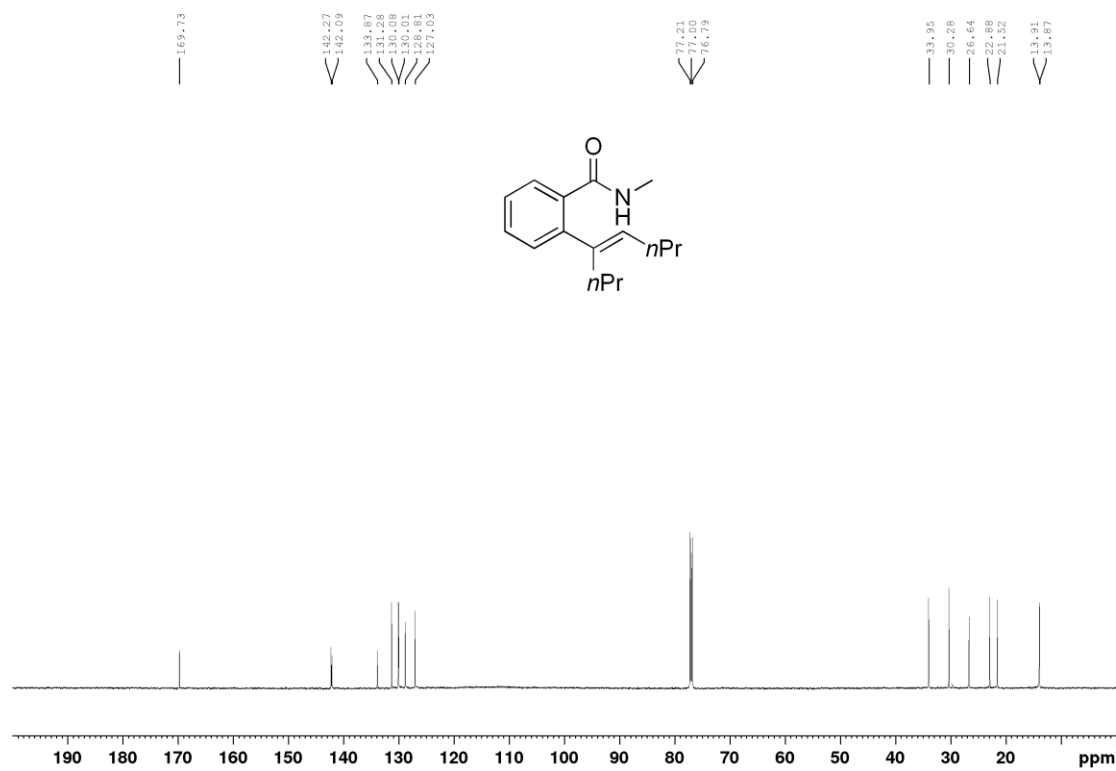

**(E)-2-(1,2-Bis(4-fluorophenyl)vinyl)-N-methylbenzamide (4l) (600 MHz)**

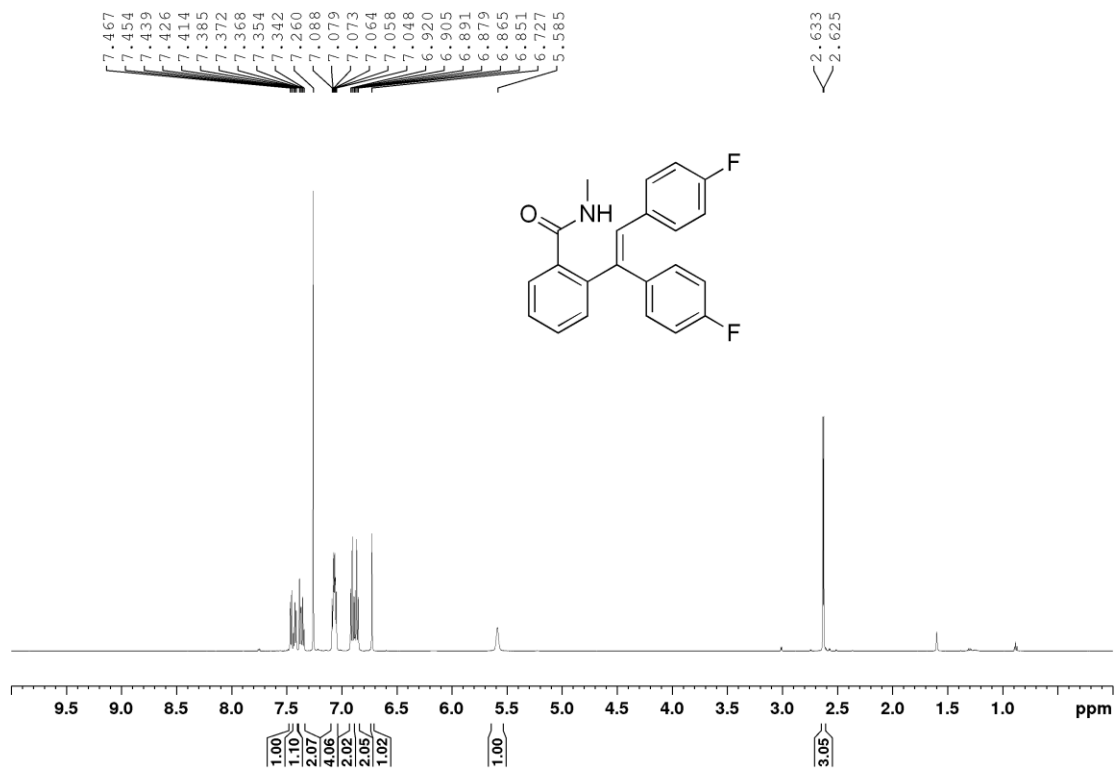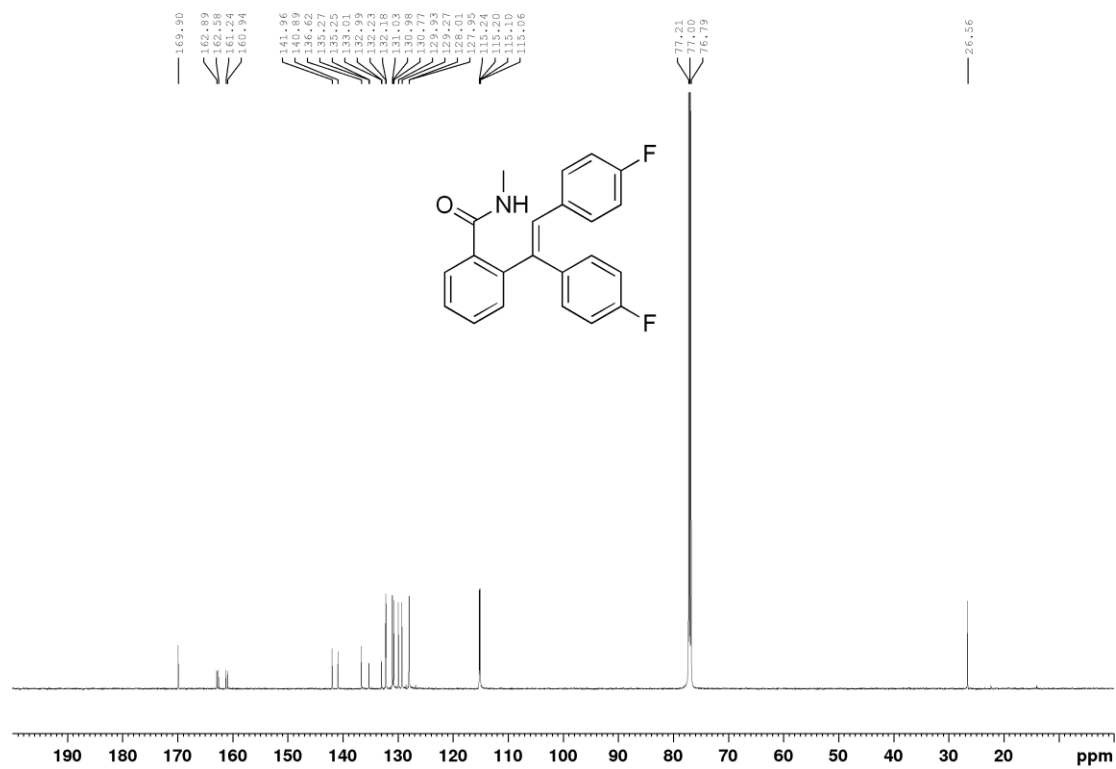

**(E)-2-(1,2-Bis(4-(trifluoromethyl)phenyl)vinyl)-N-methylbenzamide (4m) (600 MHz)**

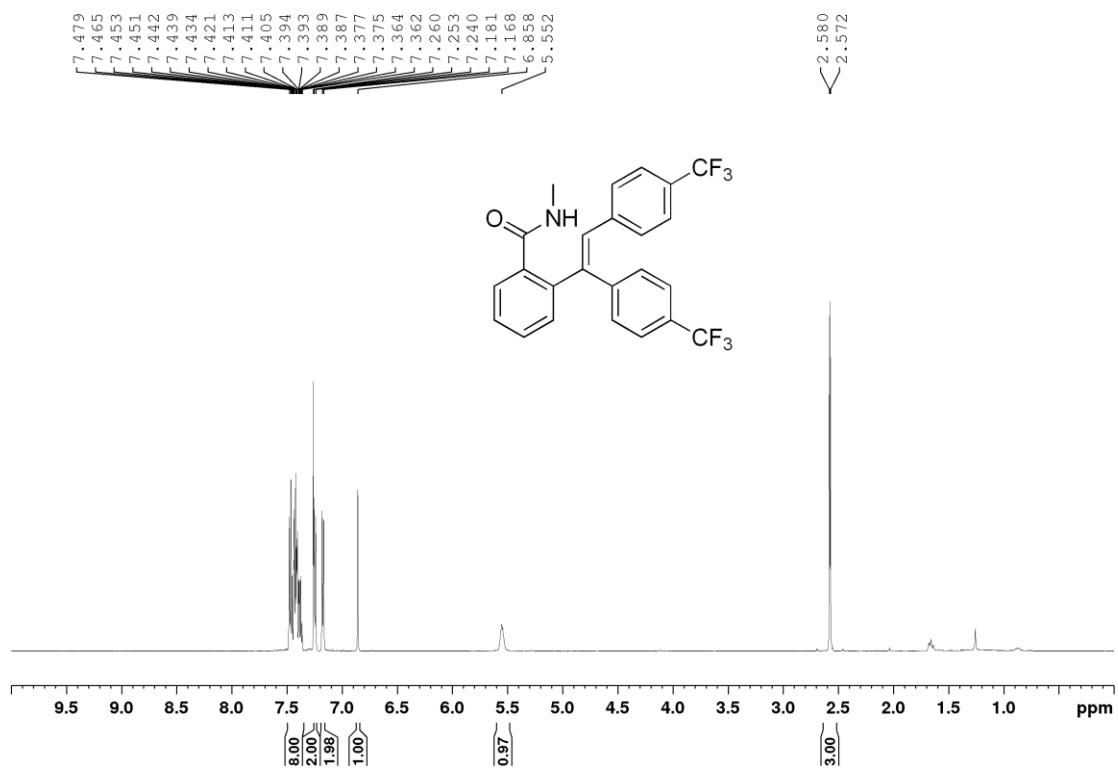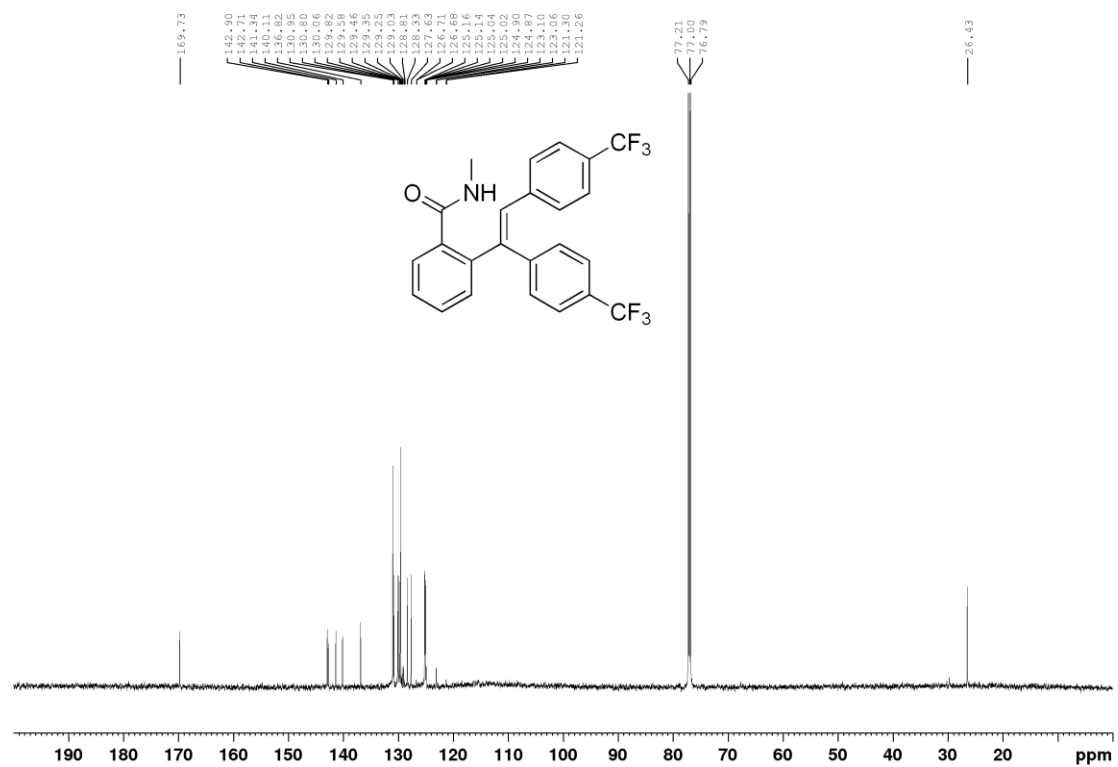

**(E)-2-(1,2-Bis(4-methoxyphenyl)vinyl)-N-methylbenzamide (4n) (600 MHz)**

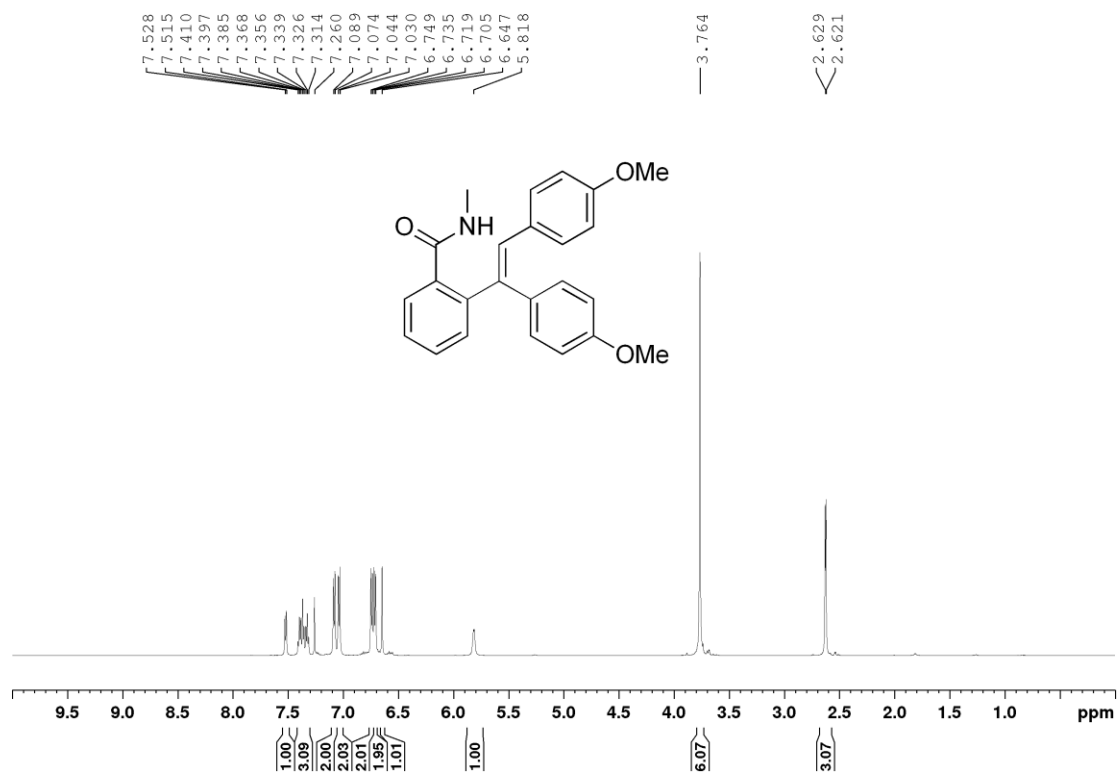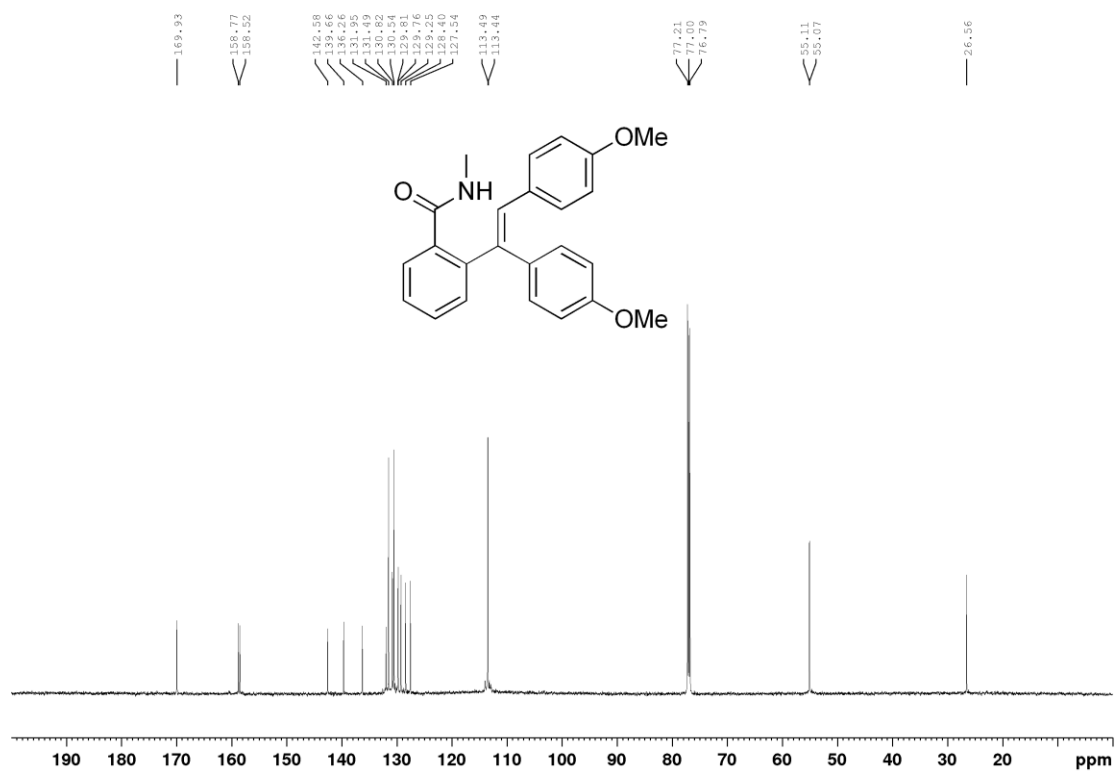

**(E)-2-(1,2-Di-*m*-tolylvinyl)-*N*-methylbenzamide (4o) (600 MHz)**

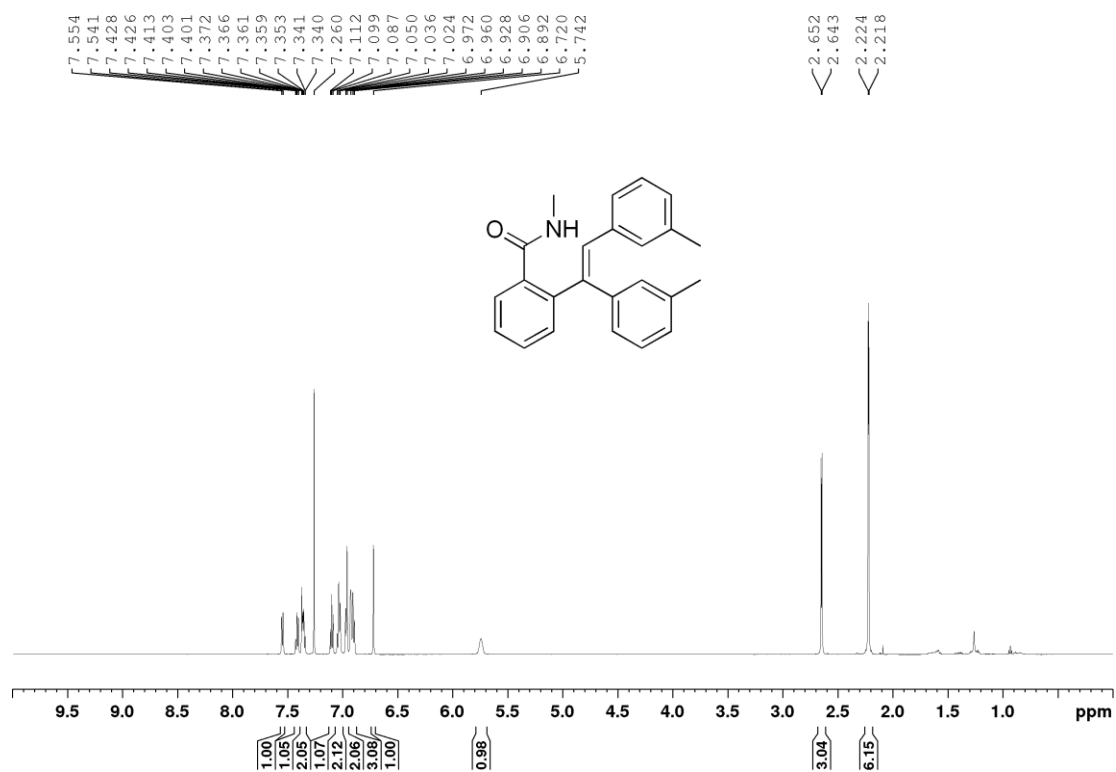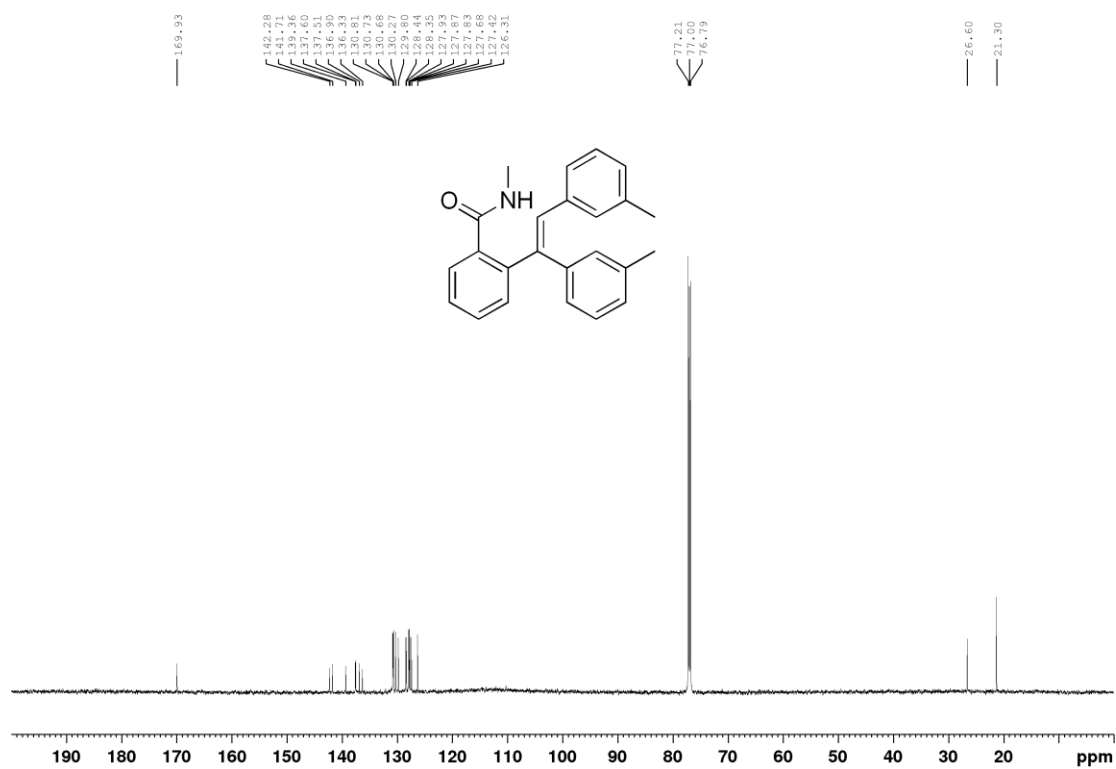



**((Z)-2-(1,2-Di(thiophen-2-yl)vinyl)-N-methylbenzamide (4p) (600 MHz)**

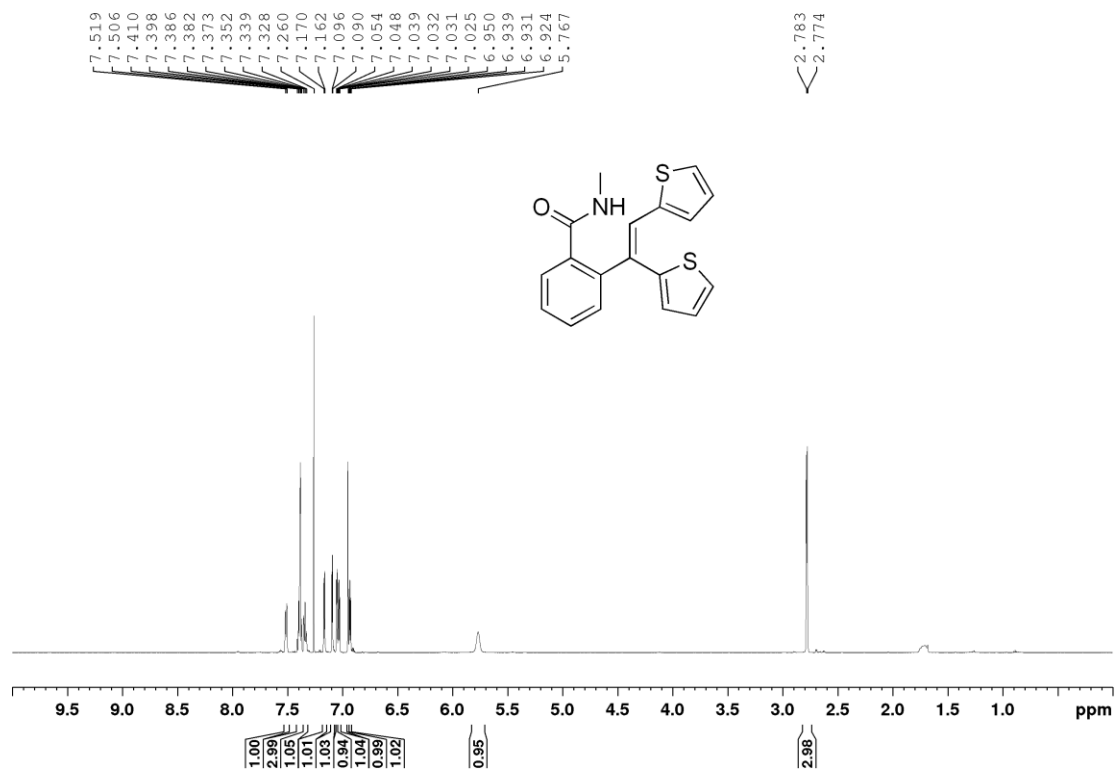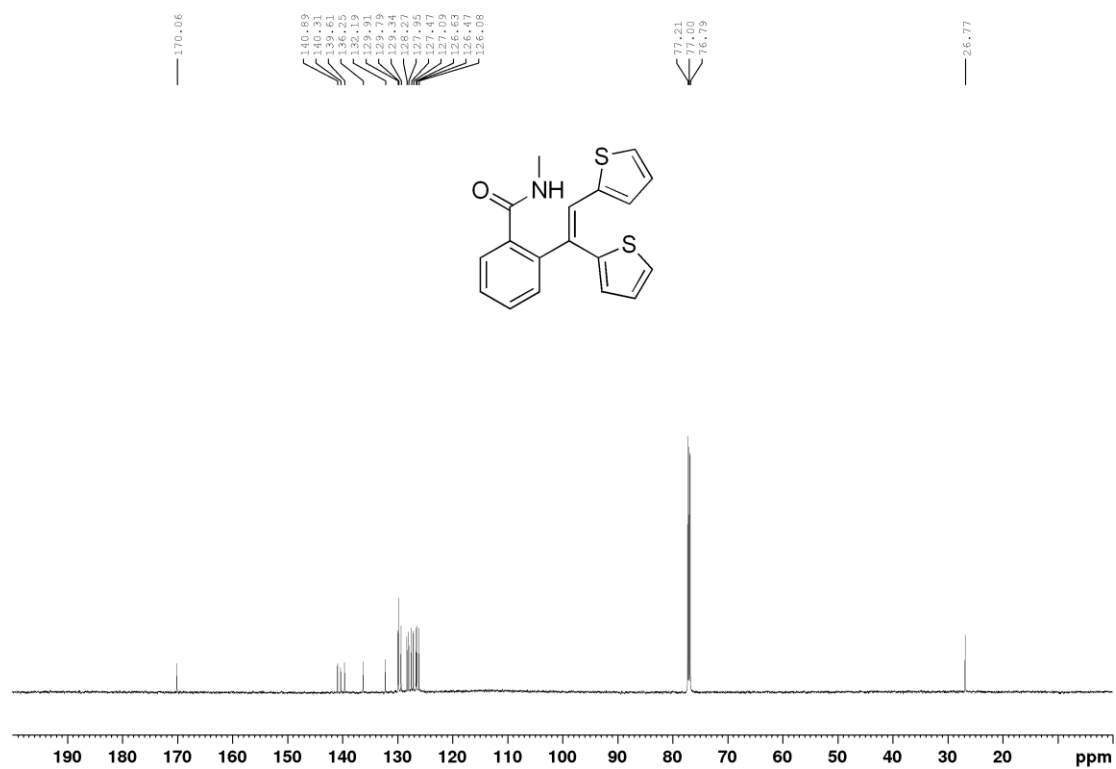

**(E)-4-Chloro-2-(hex-3-en-3-yl)-N-methylbenzamide (4q) (400 MHz)**

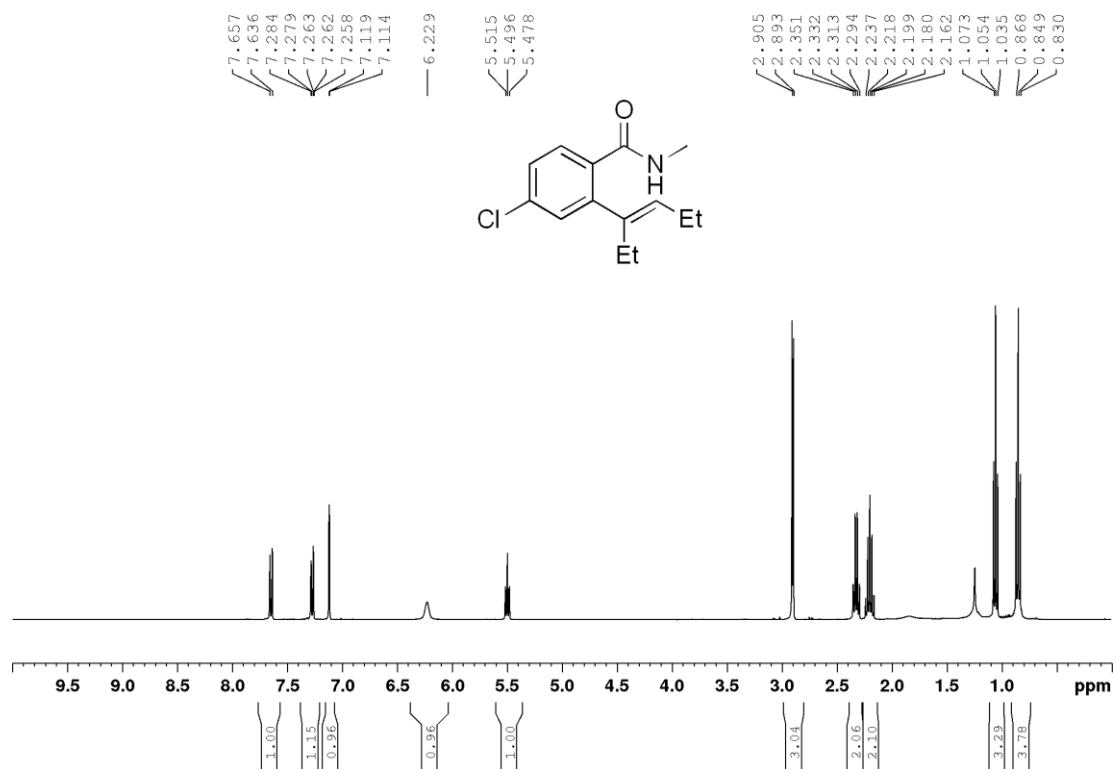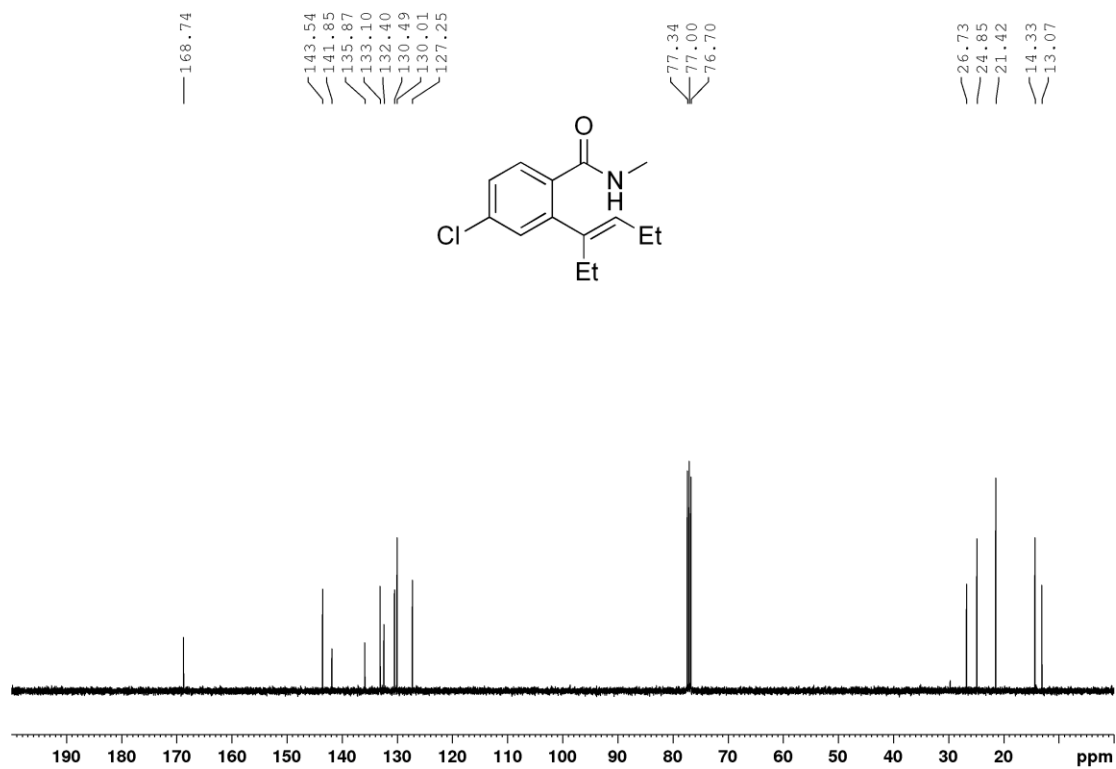

**(E)-2-(1,2-Bis(4-methoxyphenyl)vinyl)-N-methyl-5-(trifluoromethyl)benzamide (4r) (600 MHz)**

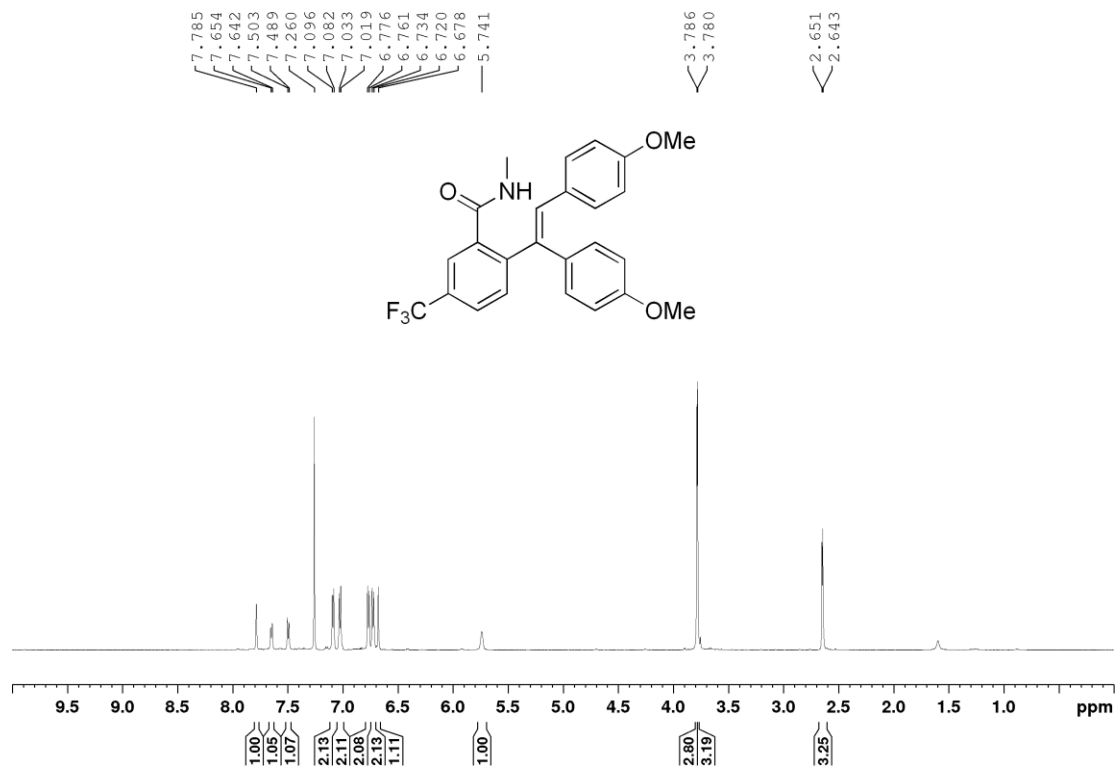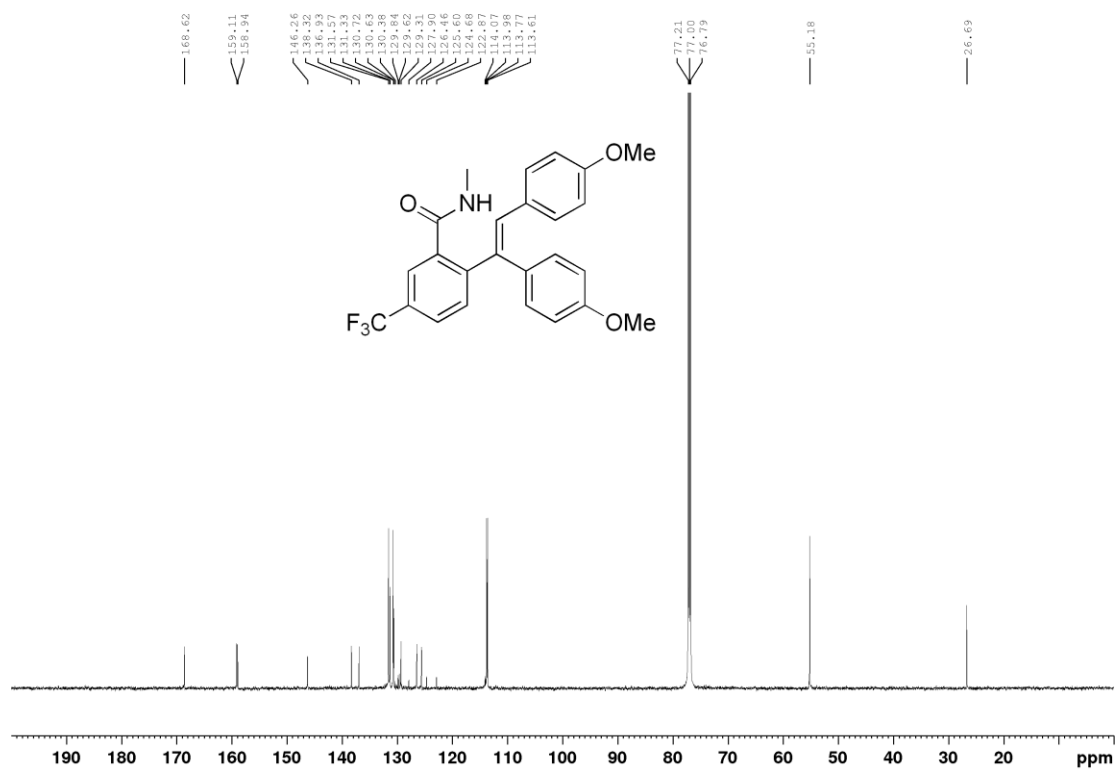

**(E)-N-Methyl-2-(1-phenylprop-1-en-1-yl)benzamide (4s) (600 MHz)**

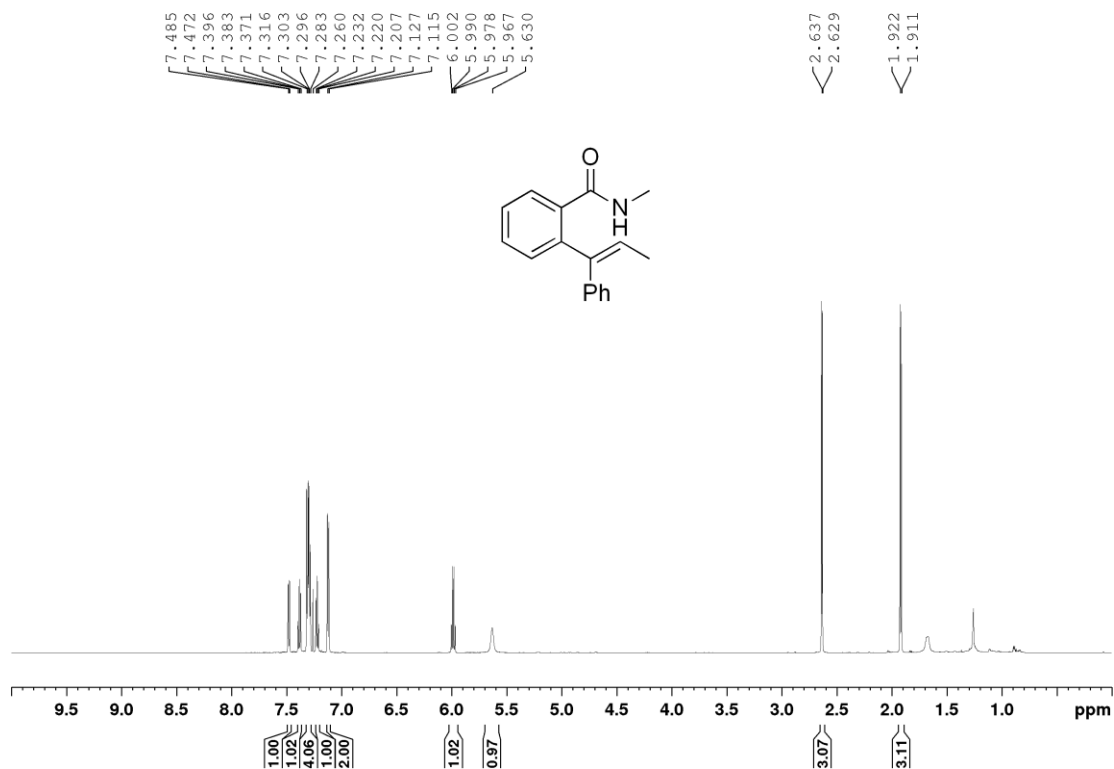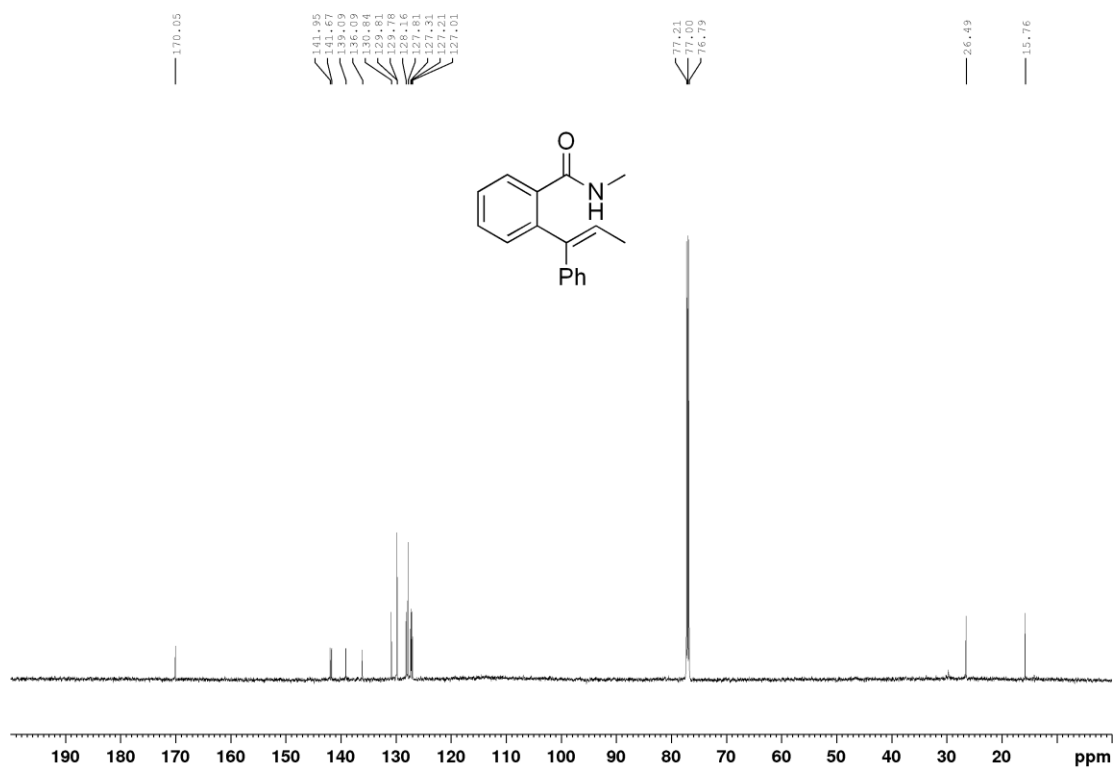

**(E)-N-Methyl-2-(1-phenylprop-1-en-2-yl)benzamide (4s') (600 MHz)**

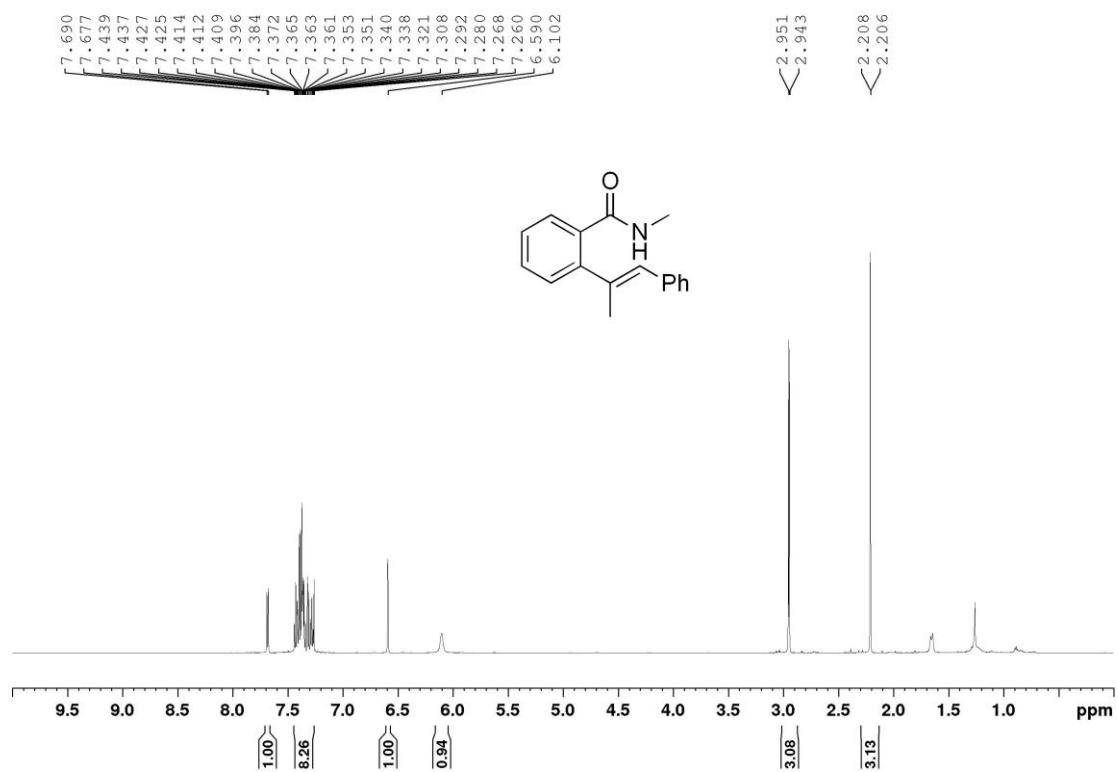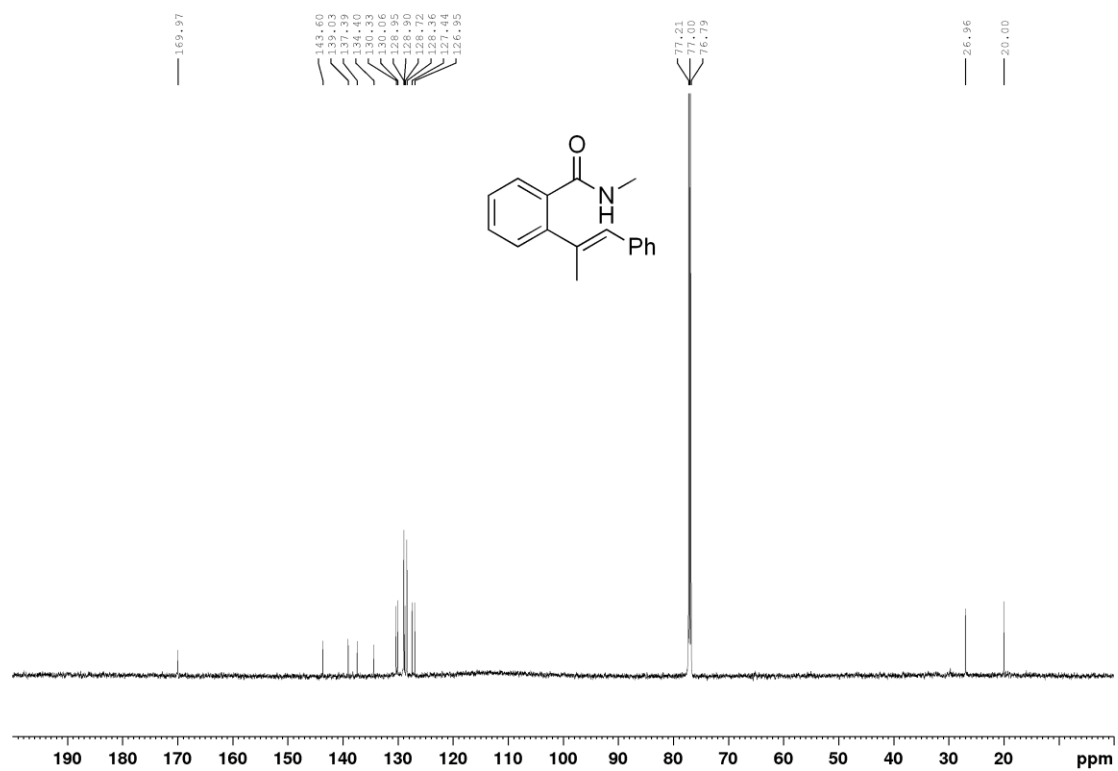

**(E)-N-Methyl-2-(1-phenylbut-1-en-1-yl)benzamide (4t) (600 MHz)**

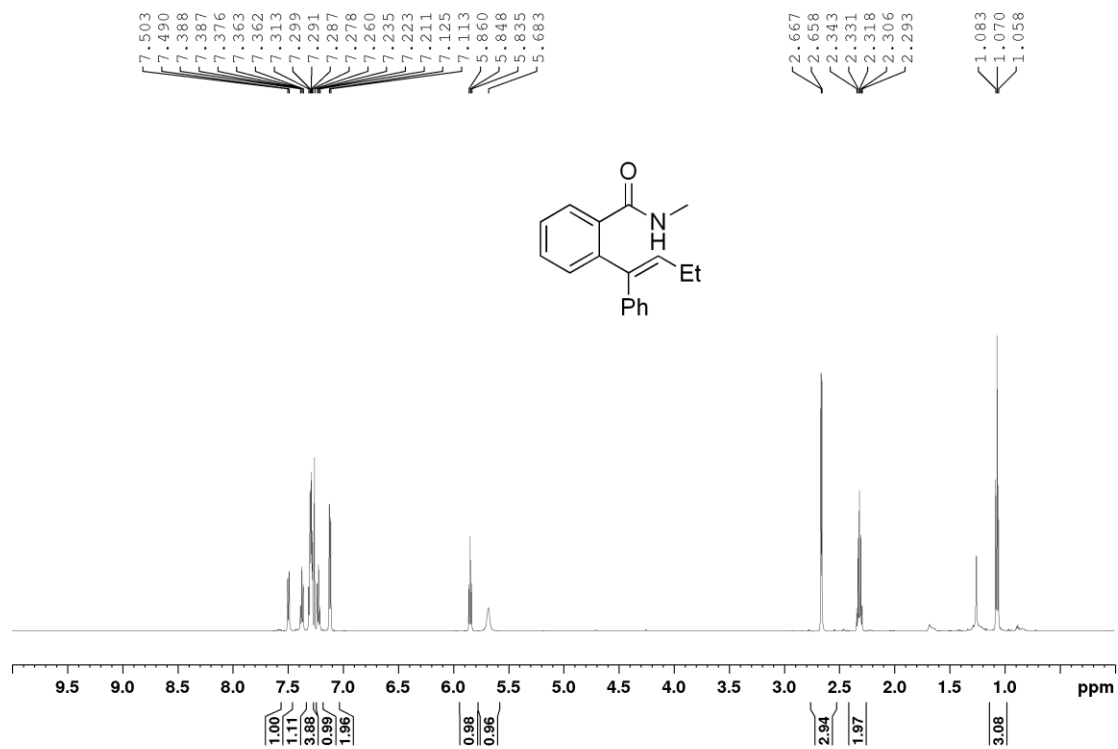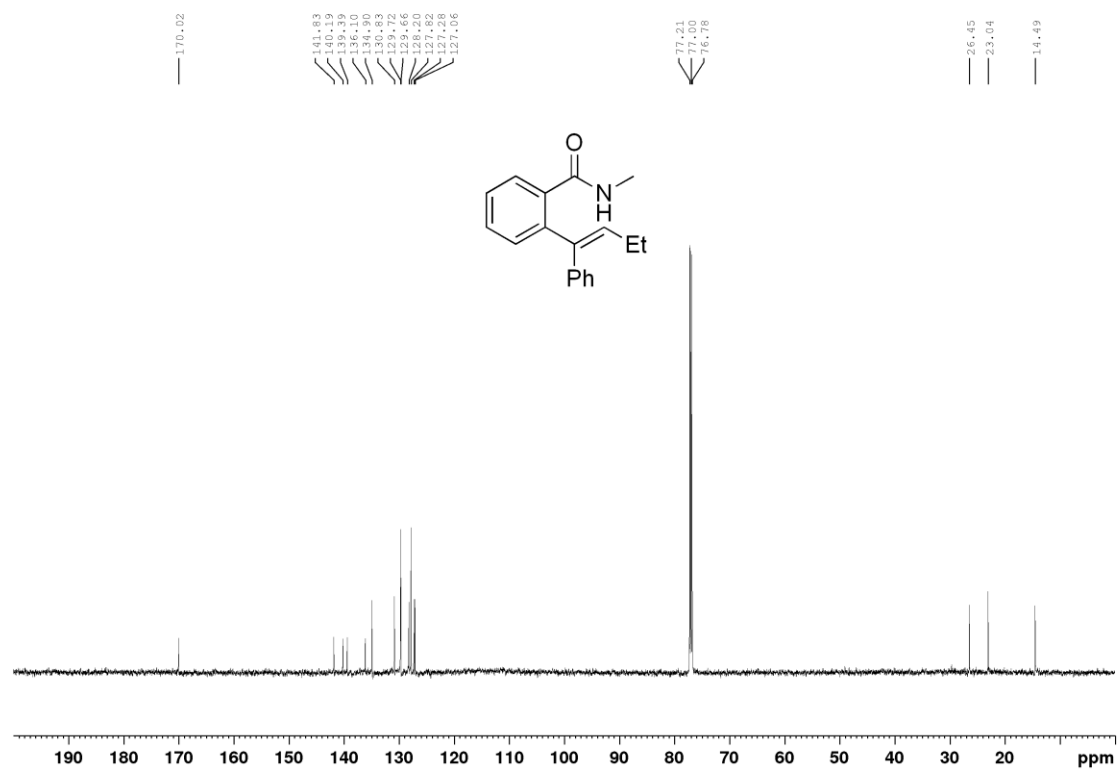

**(E)-N-Methyl-2-(1-phenylbut-1-en-2-yl)benzamide (4t') (600 MHz)**

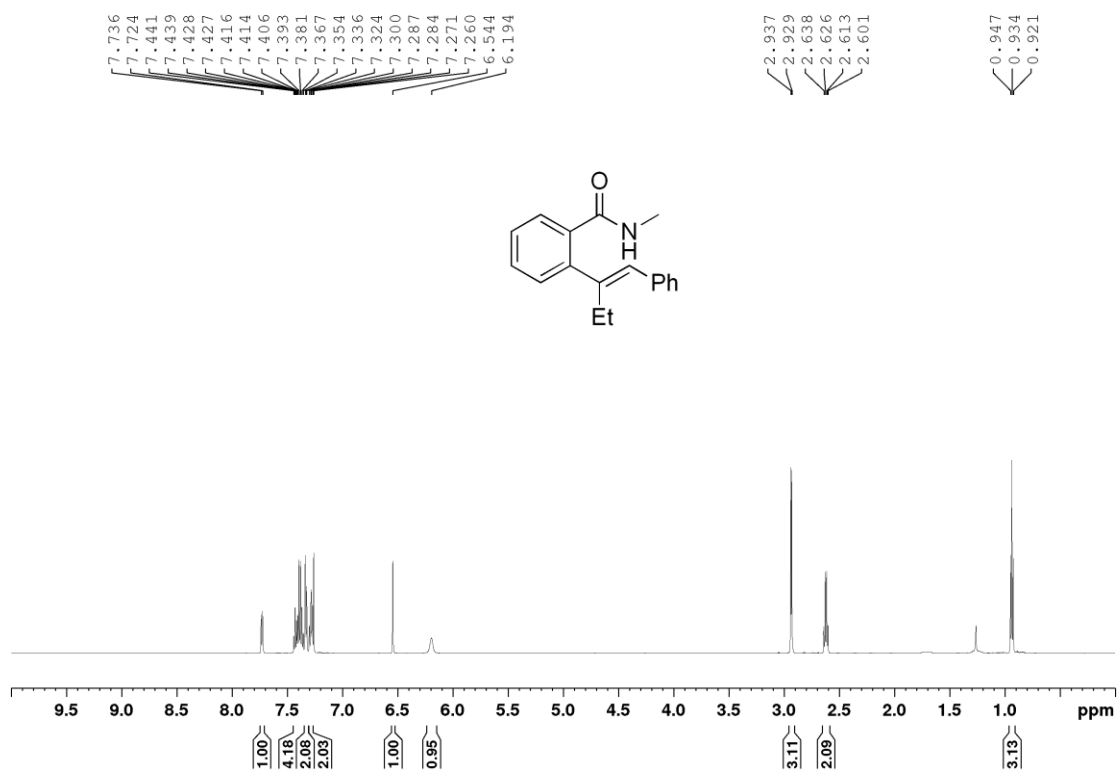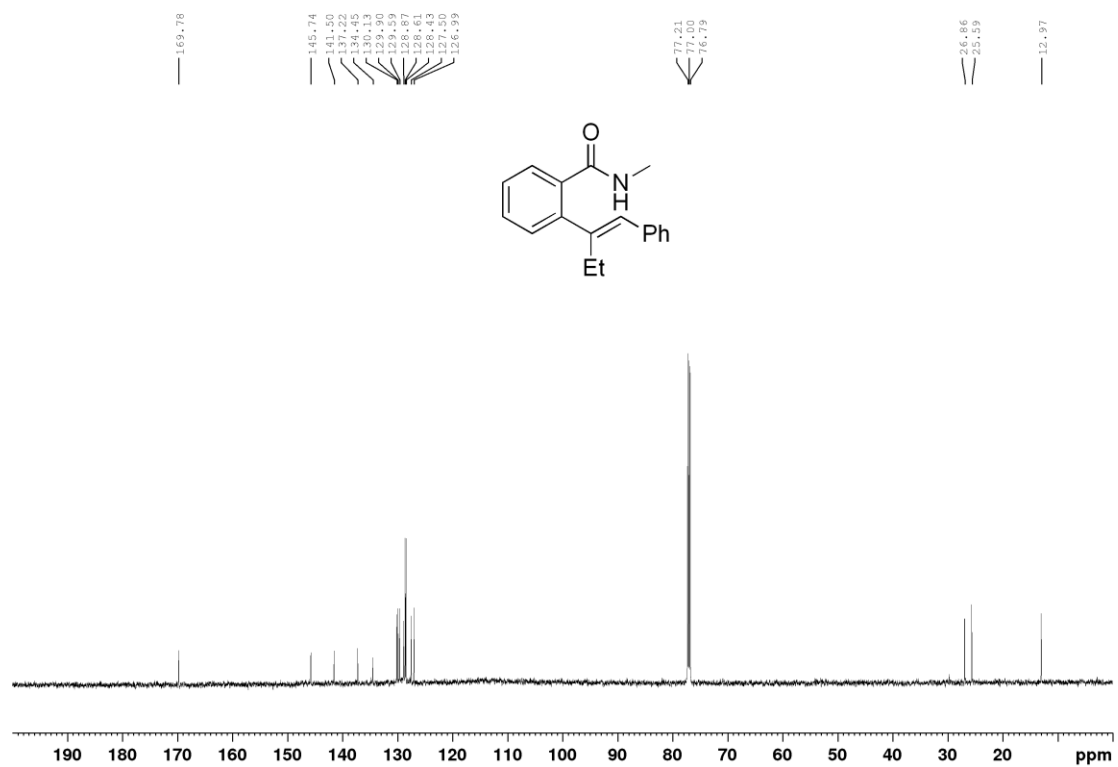

**(E)-N-Methyl-2-(1-phenylpent-1-en-1-yl)benzamide (4u) (600 MHz)**

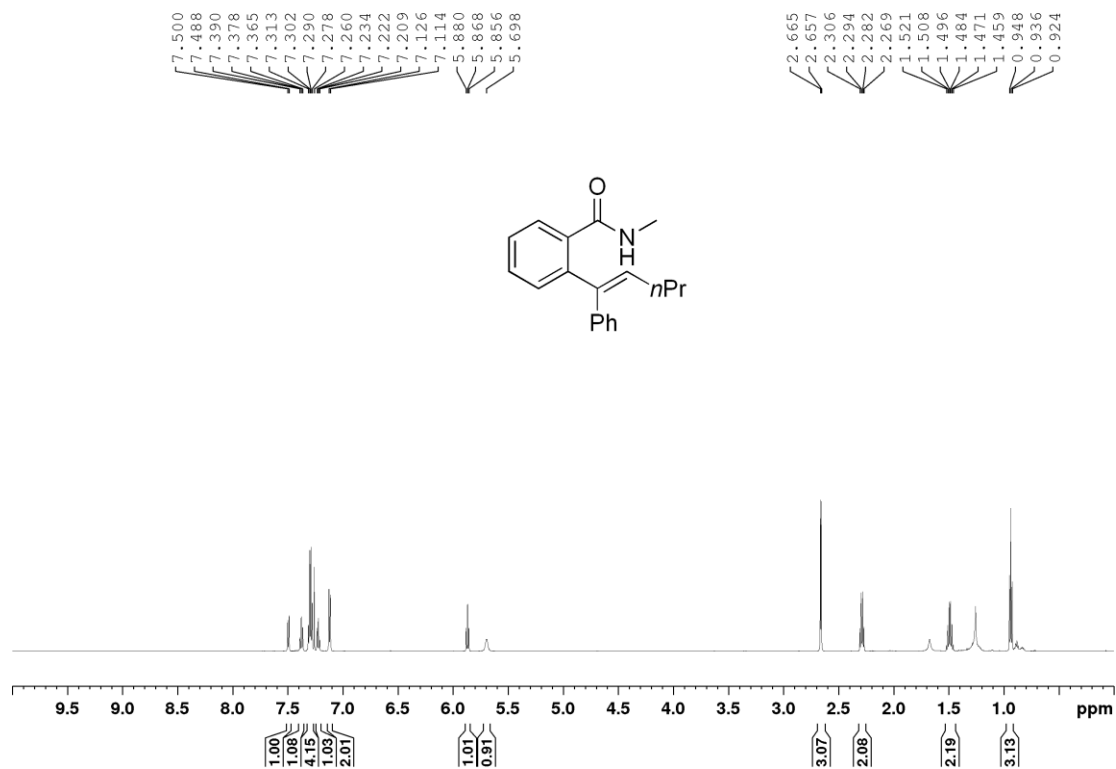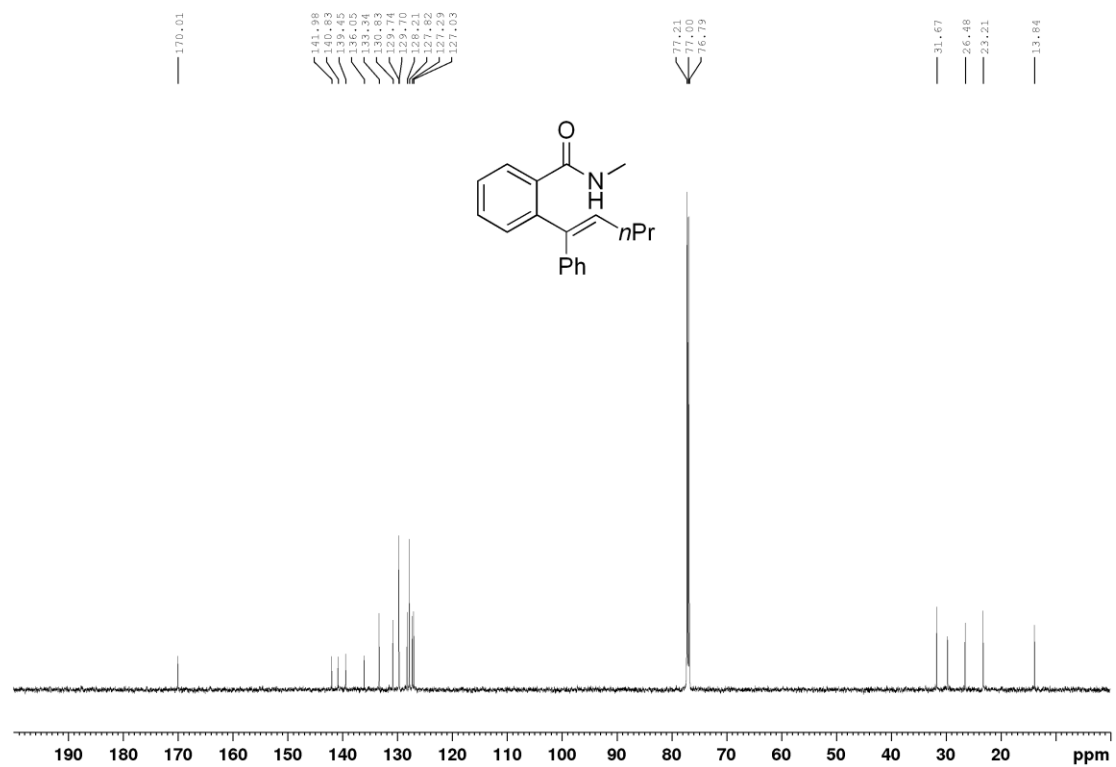



**(E)-N-Methyl-2-(1-phenylpent-1-en-2-yl)benzamide (4u') (600 MHz)**

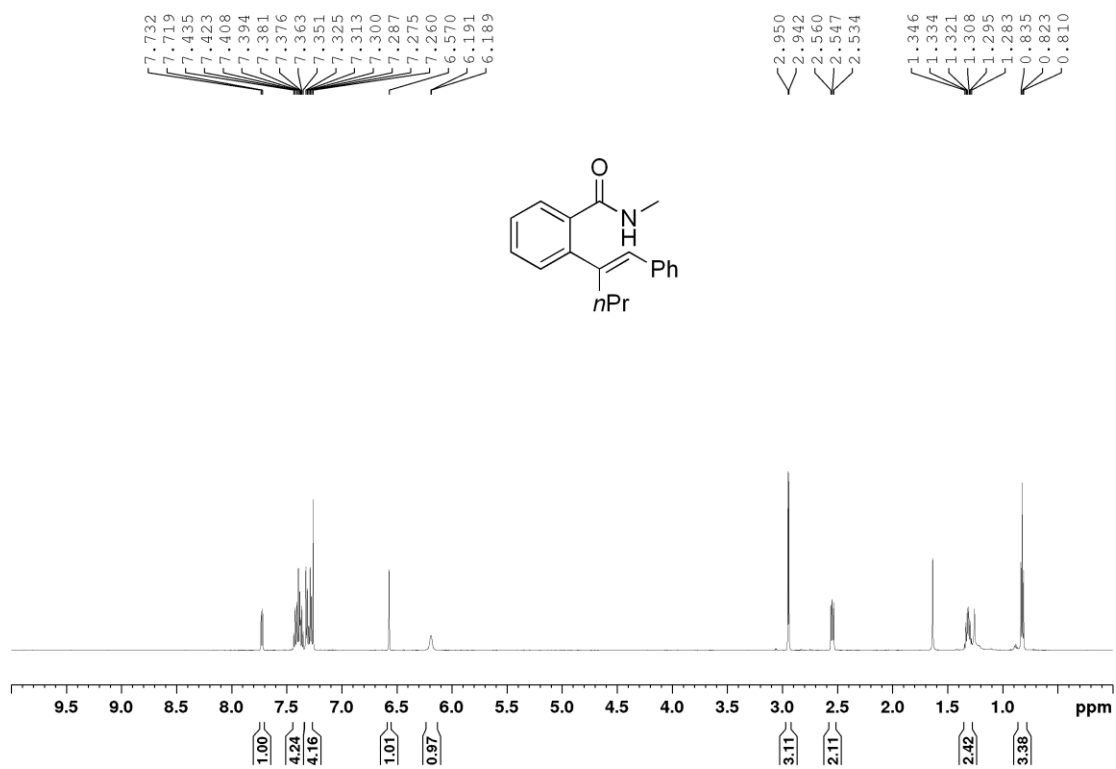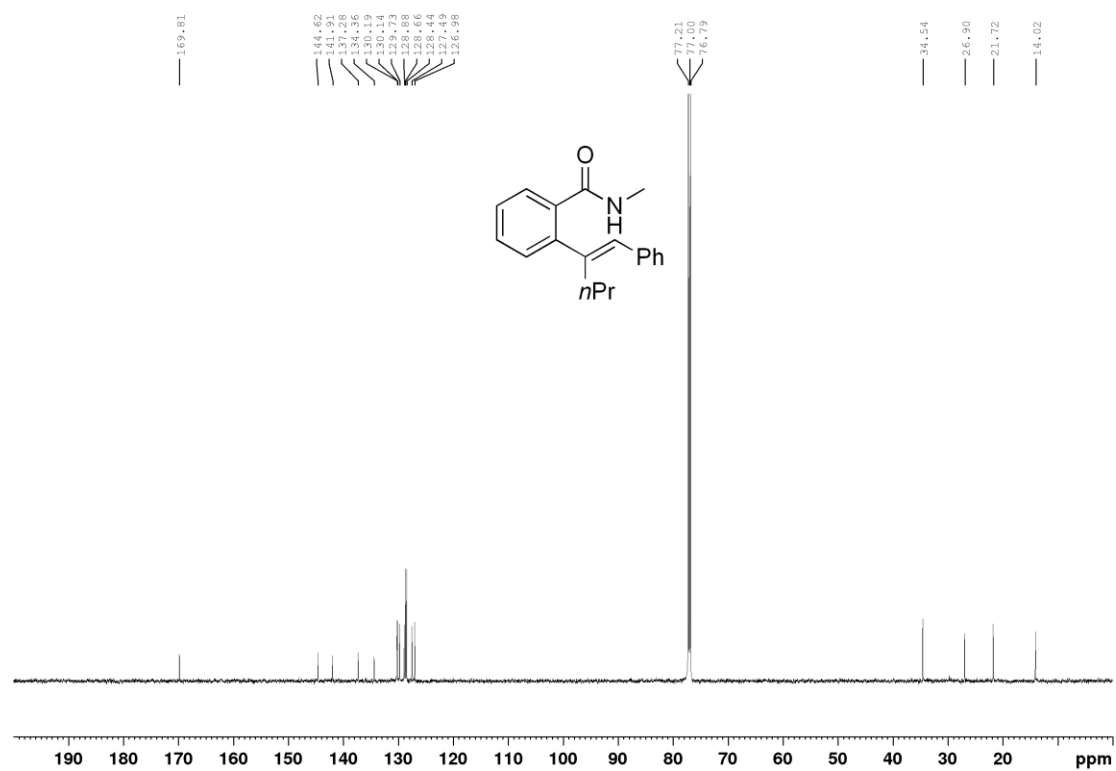

**(E)-N-Methyl-2-(1-phenyl-2-(trimethylsilyl)vinyl)benzamide (4v) (600 MHz)**

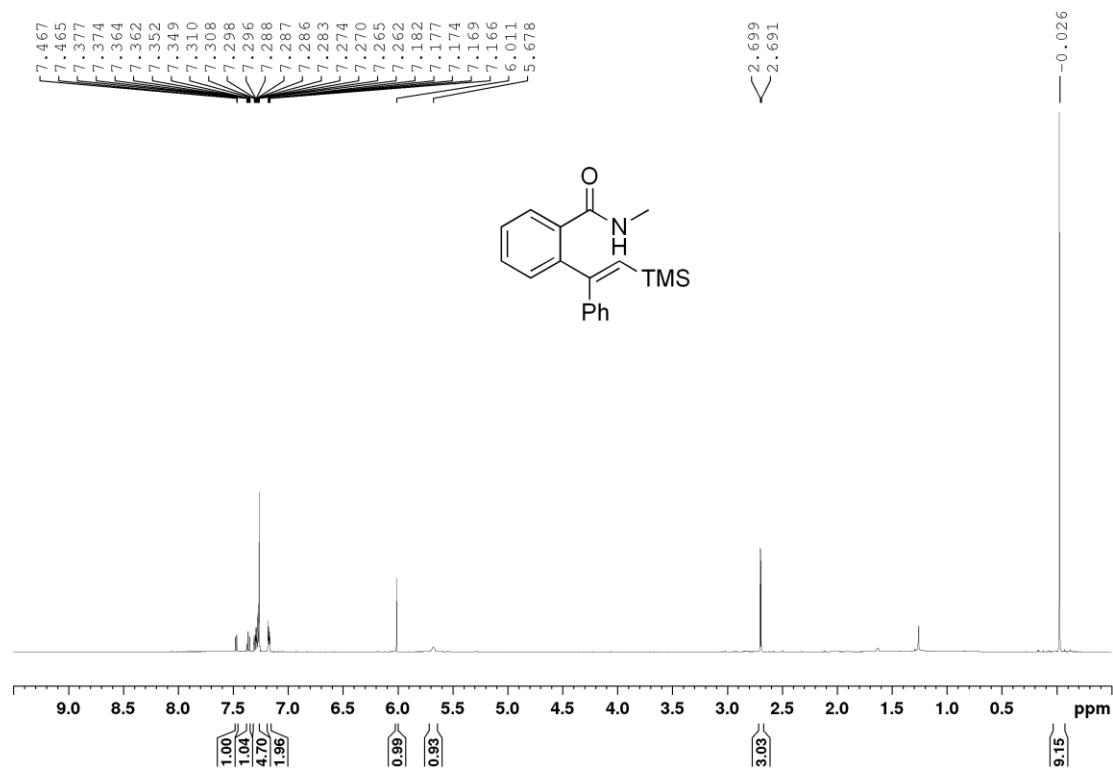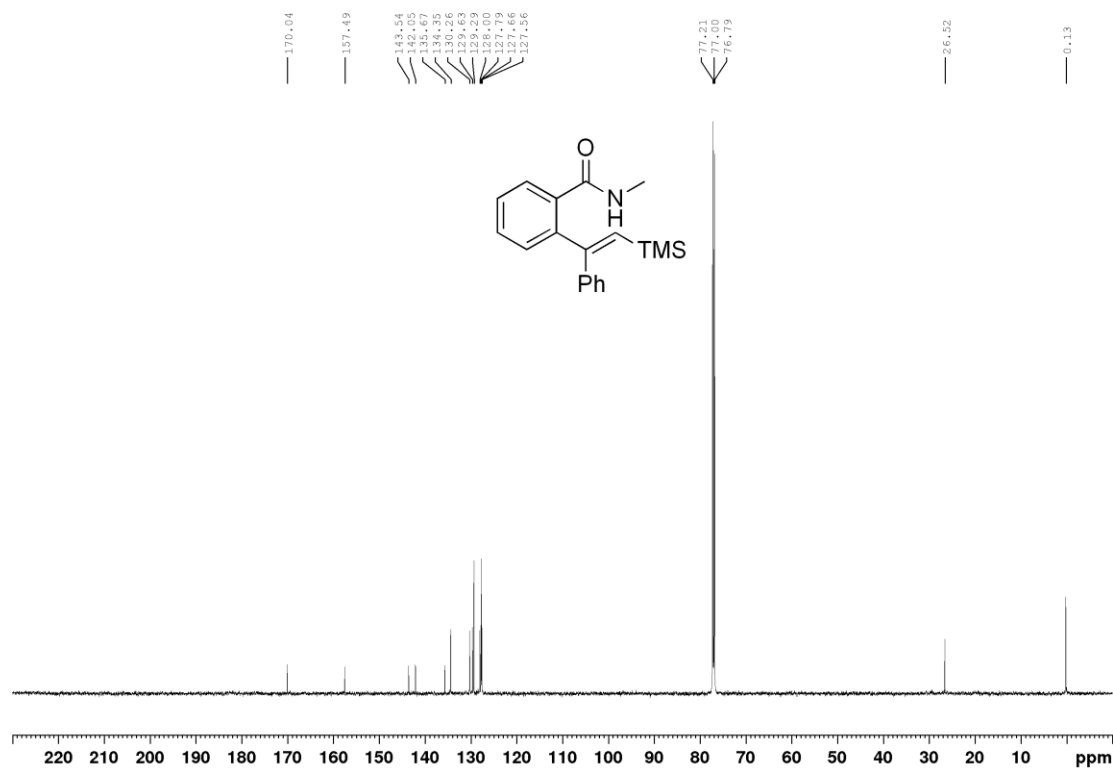

(Z)-N-Methyl-2-(2-phenyl-1-(trimethylsilyl)vinyl)benzamide (4v') (600 MHz)

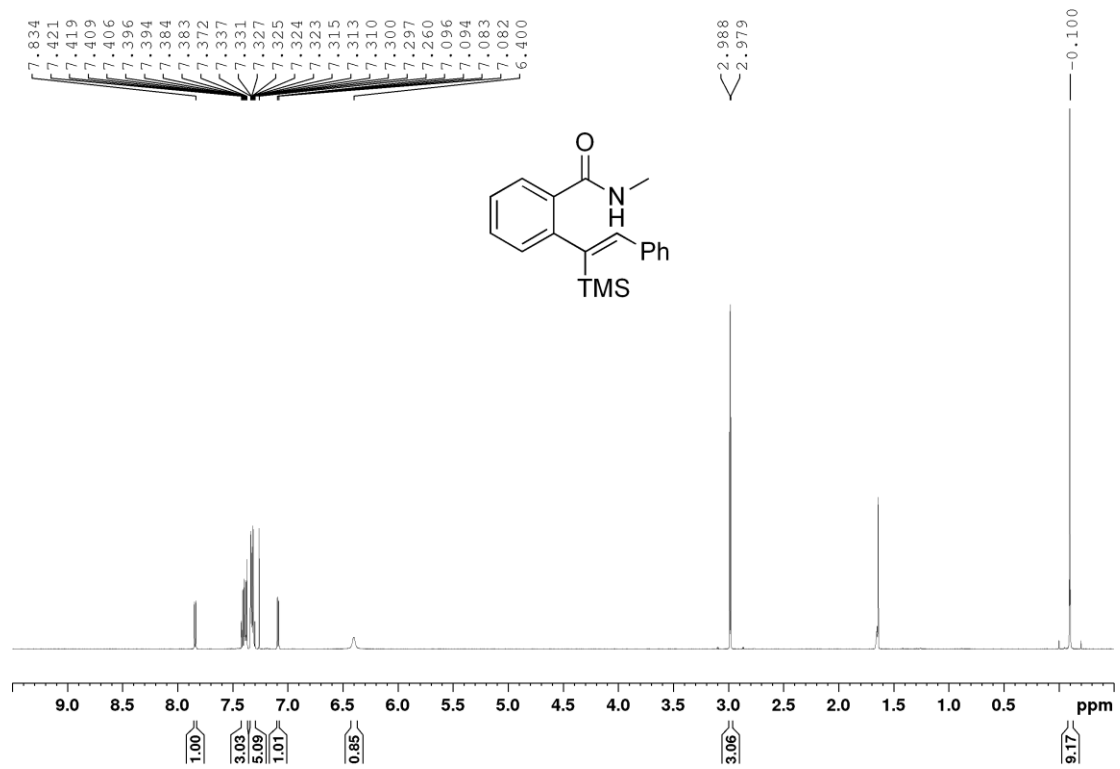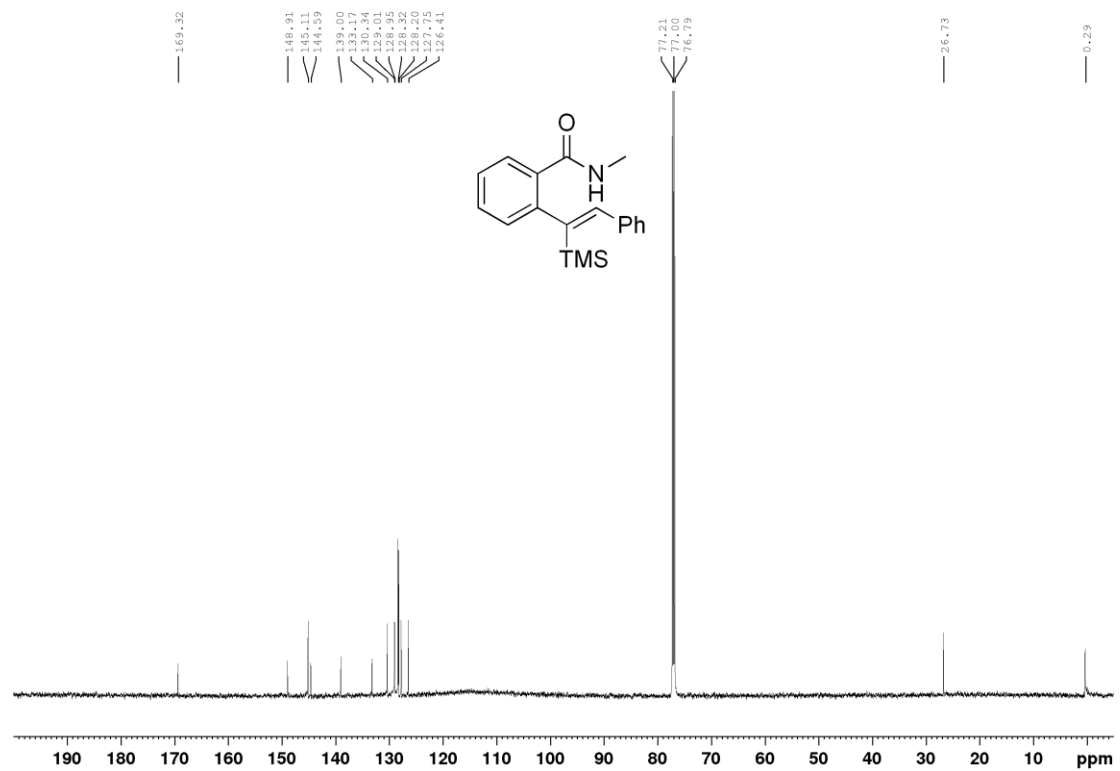

# 2-Methyl-3,4,5,6-tetraphenylpyridine (5) (600 MHz)

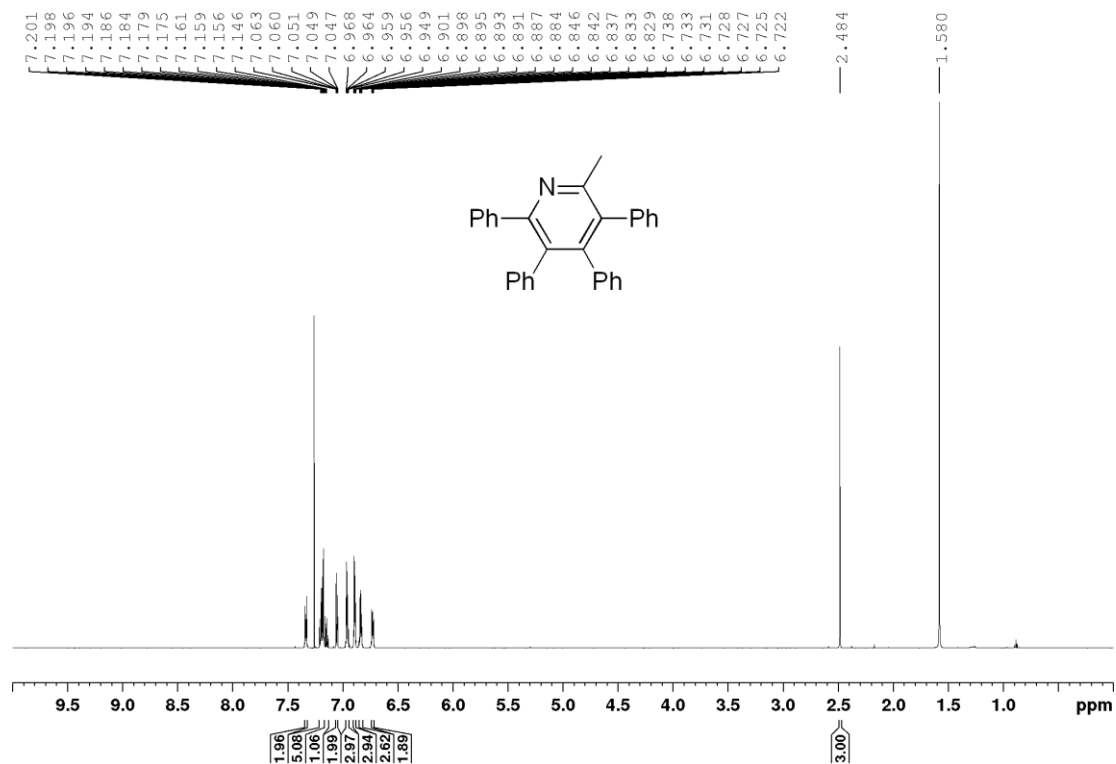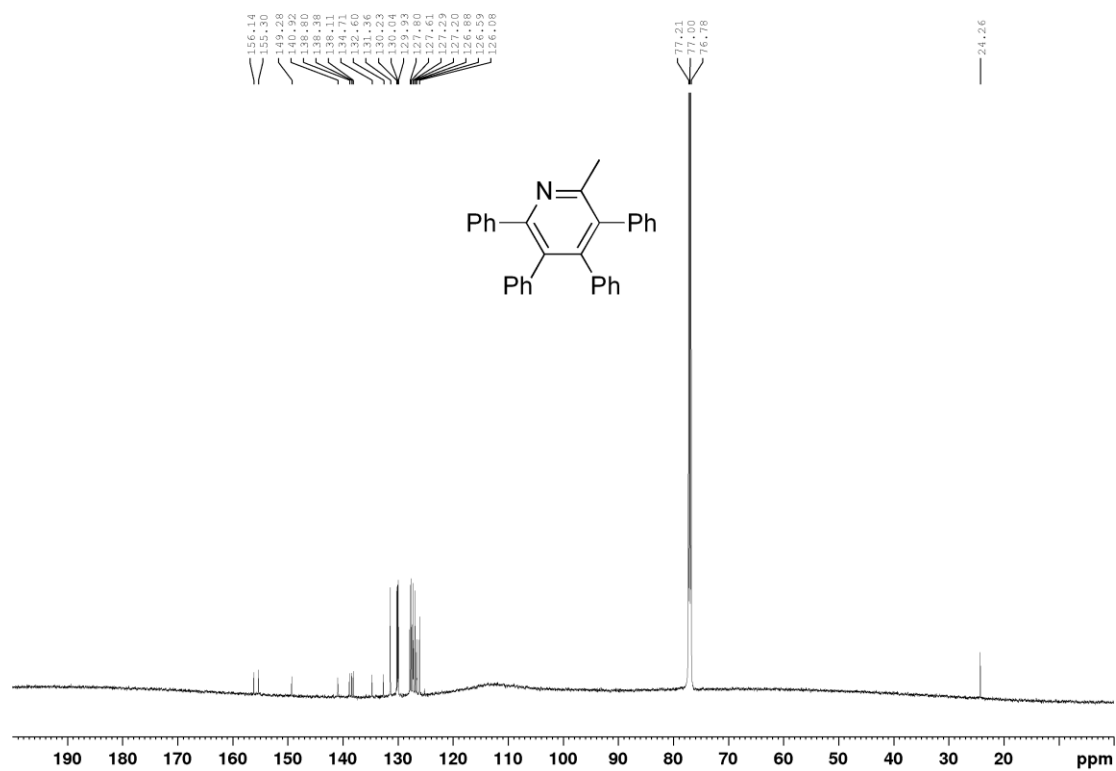

**(Z)-N-(3,4-Diphenyl-1H-isochromen-1-ylidene)methanamine (6) (600 MHz)**

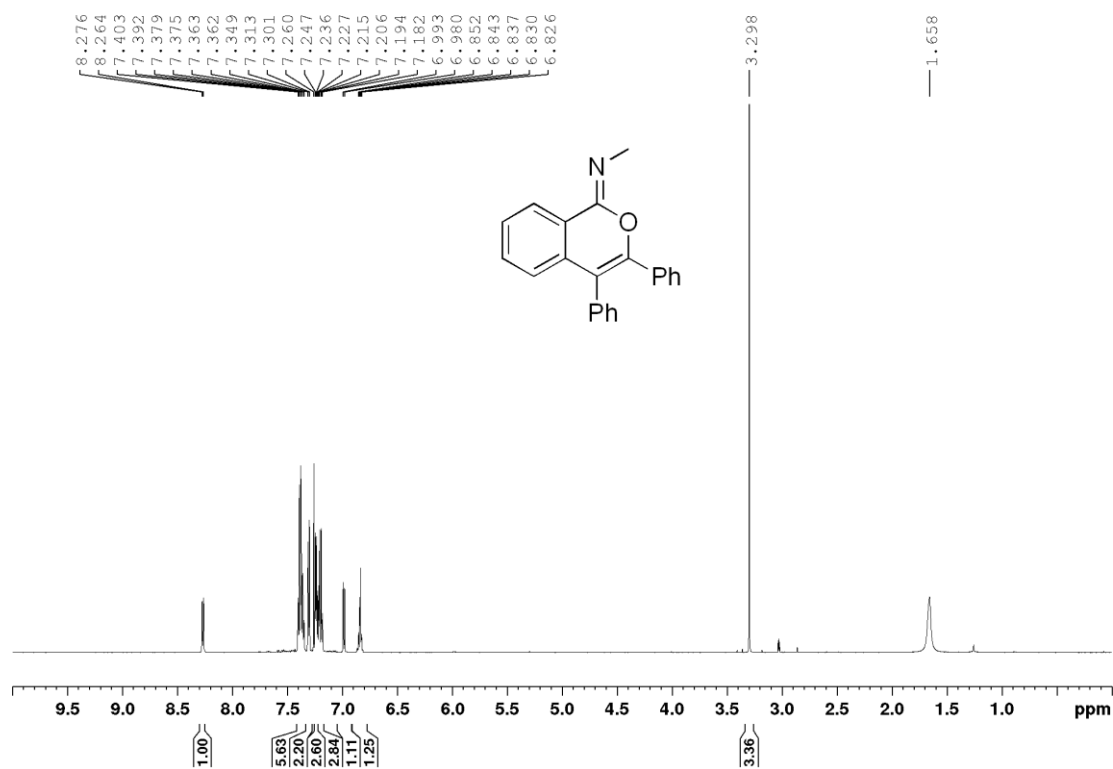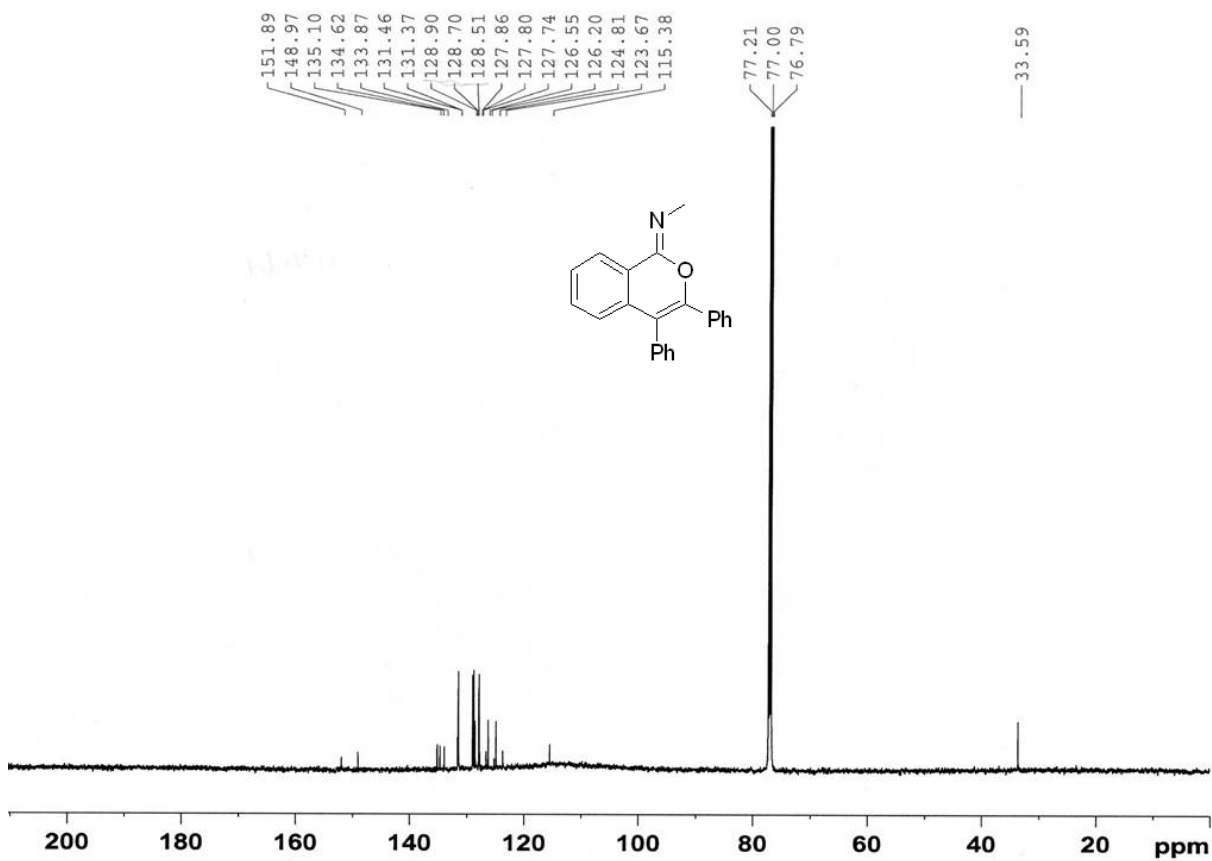

**(Z)-N-(3-Benzyl-3-phenylisobenzofuran-1(3H)-ylidene)methanamine (7) (600 MHz)**

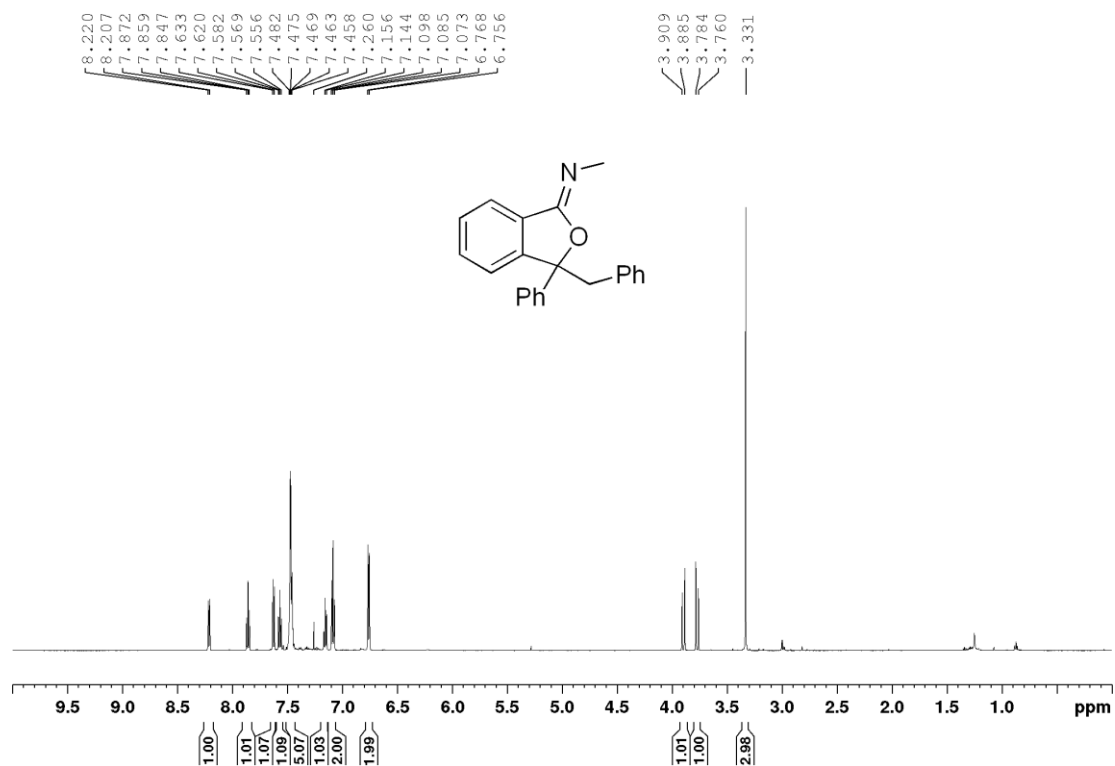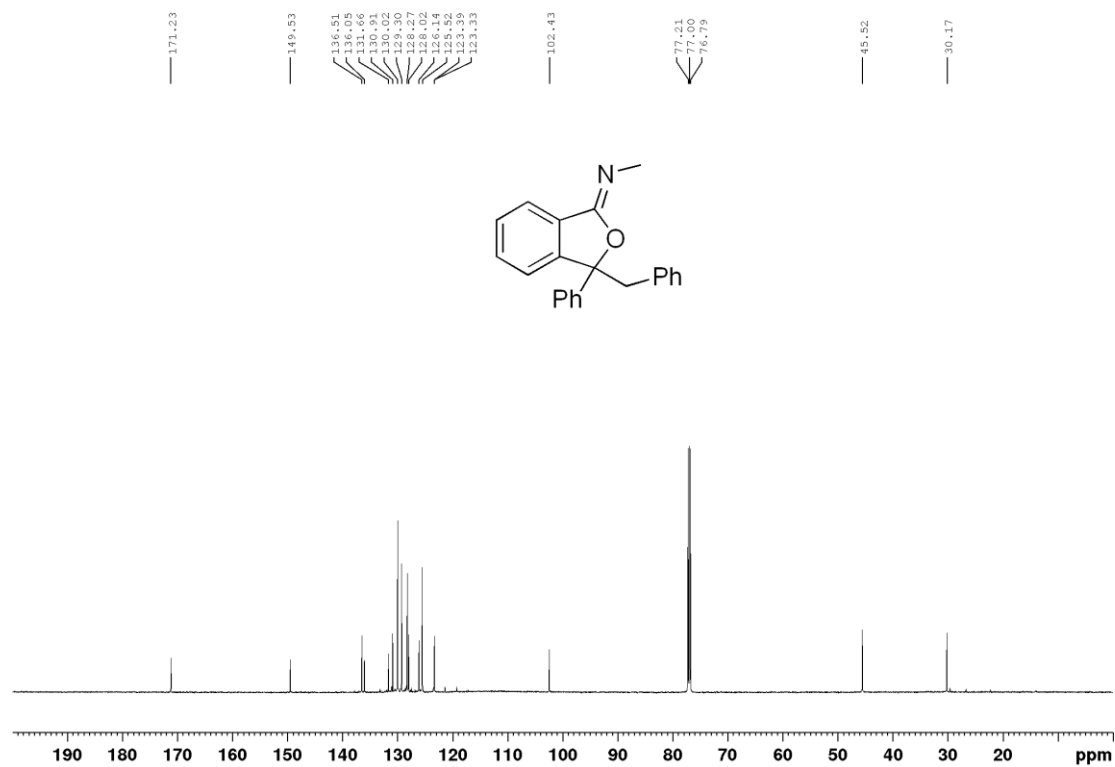

**3-(Benzo[d][1,3]dioxol-5-yl)-4-(2-hydroxyethyl)-6,7-dimethoxy-2-methylisoquinolin-1(2H)-one (3y) (600 MHz)**

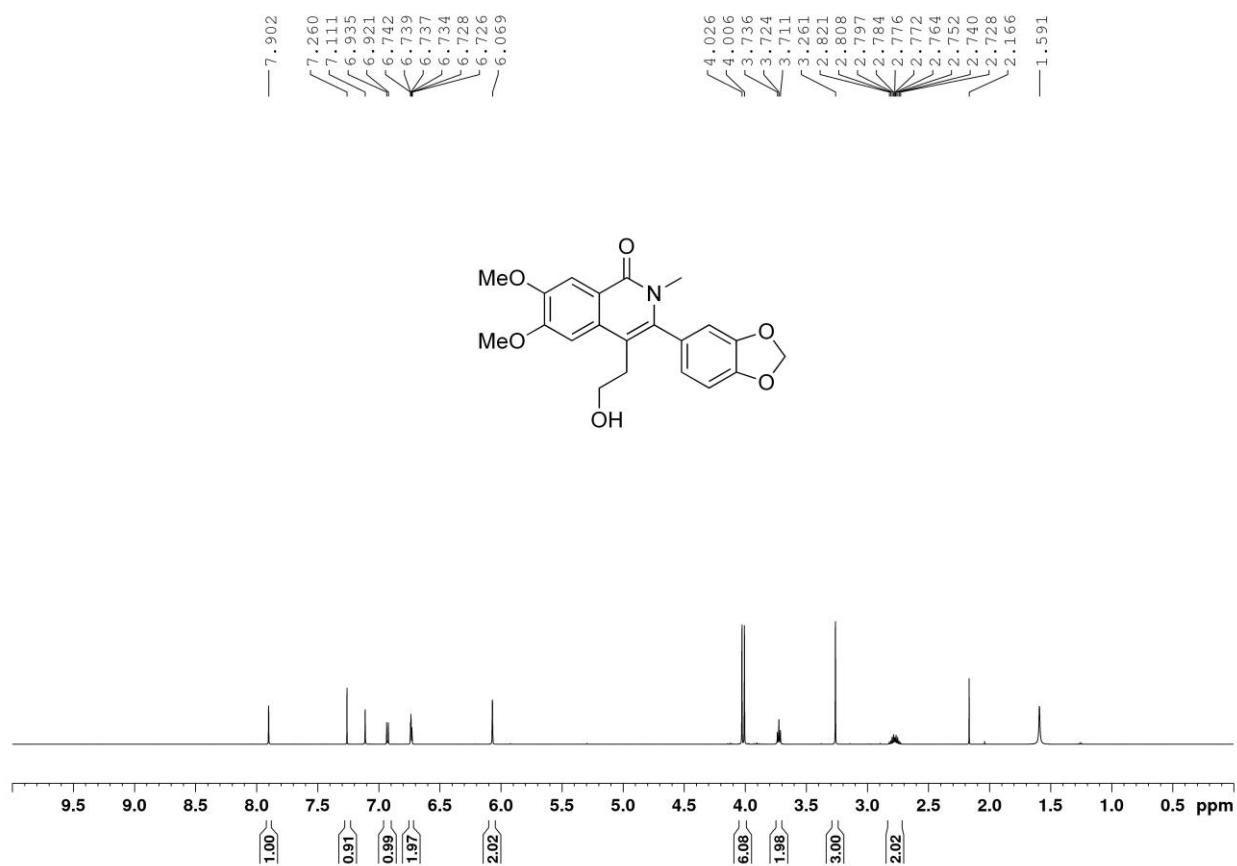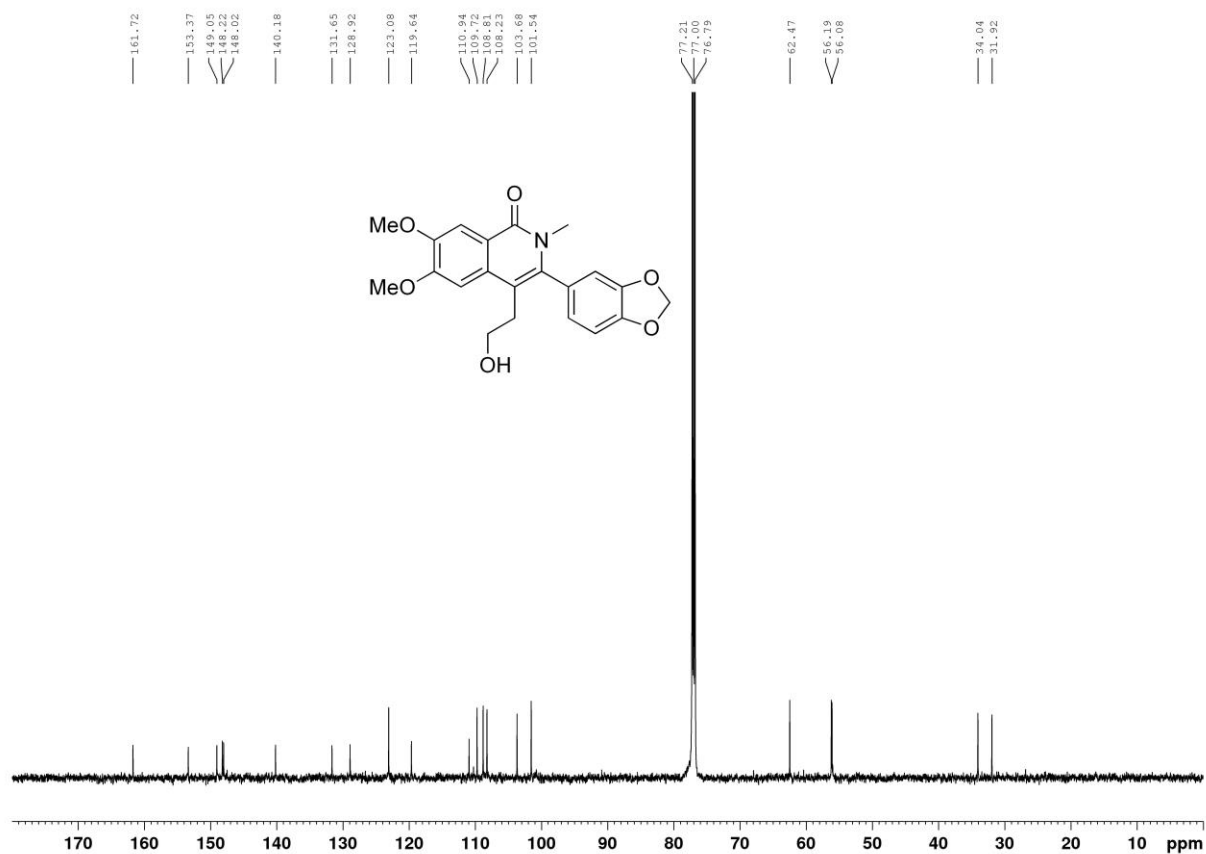

2-(3-(Benzo[d][1,3]dioxol-5-yl)-6,7-dimethoxy-2-methyl-1-oxo-1,2-dihydroisoquinolin-4-yl)acetaldehyde (3y') (600 MHz)

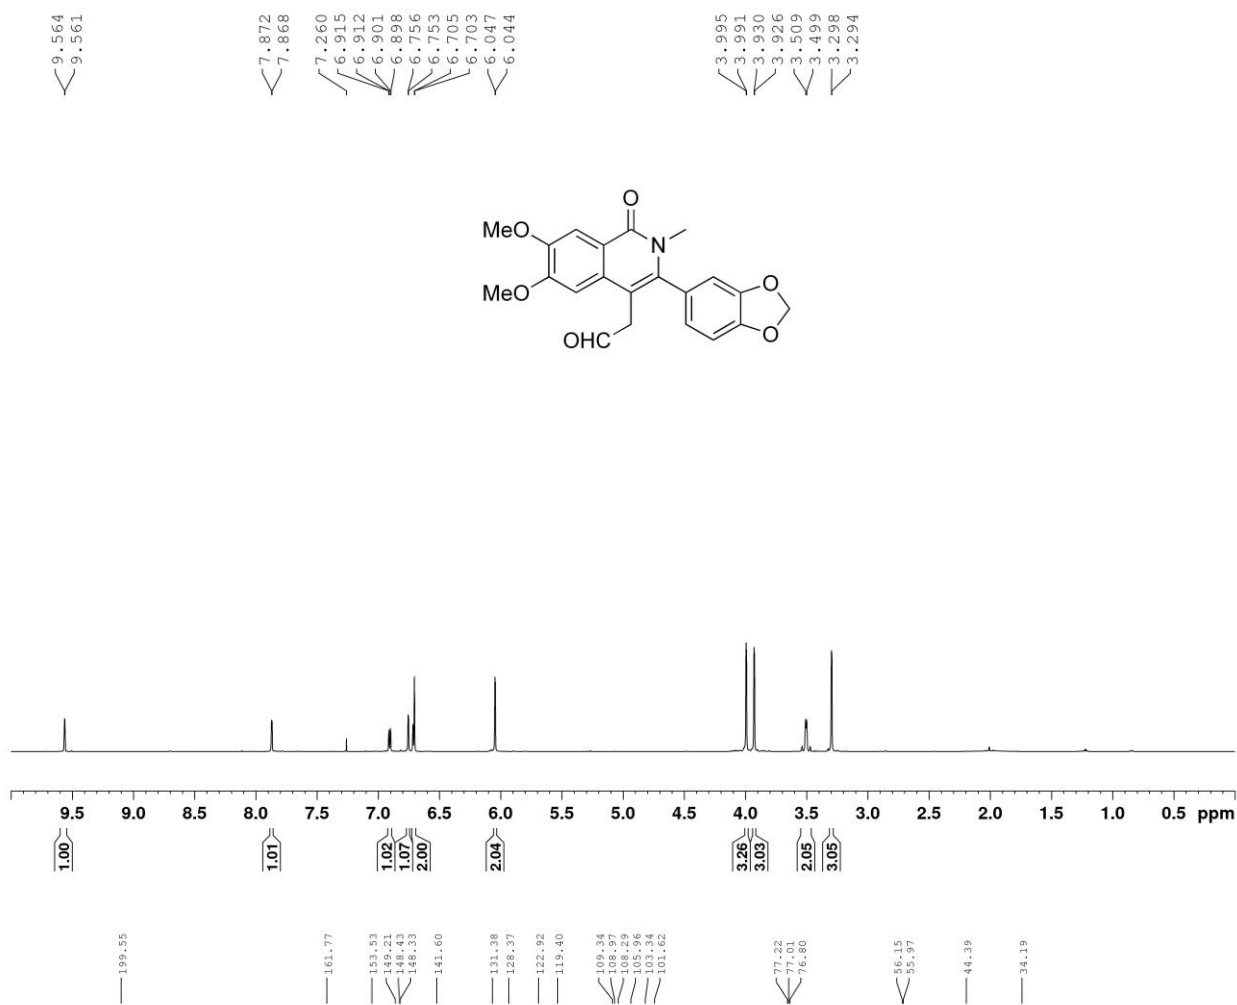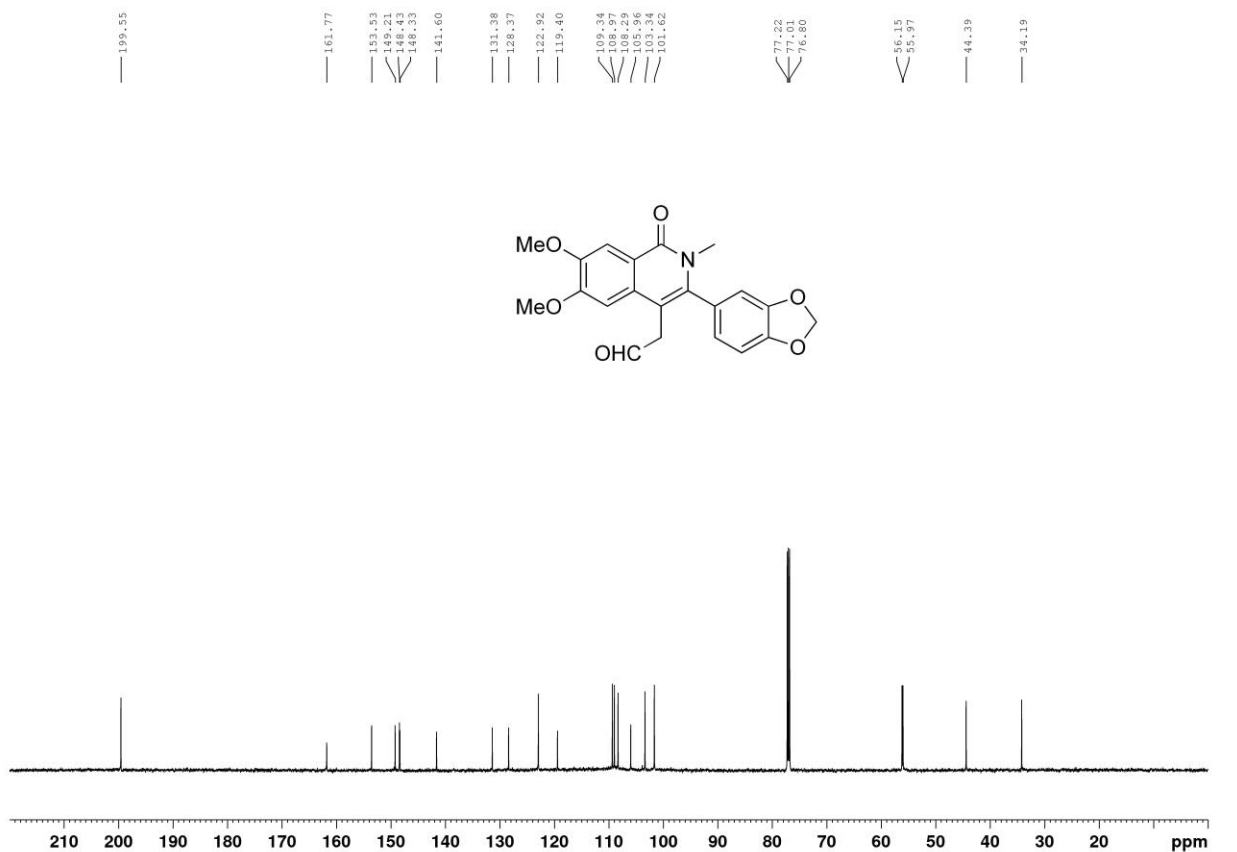



Oxynitidine (600 MHz)

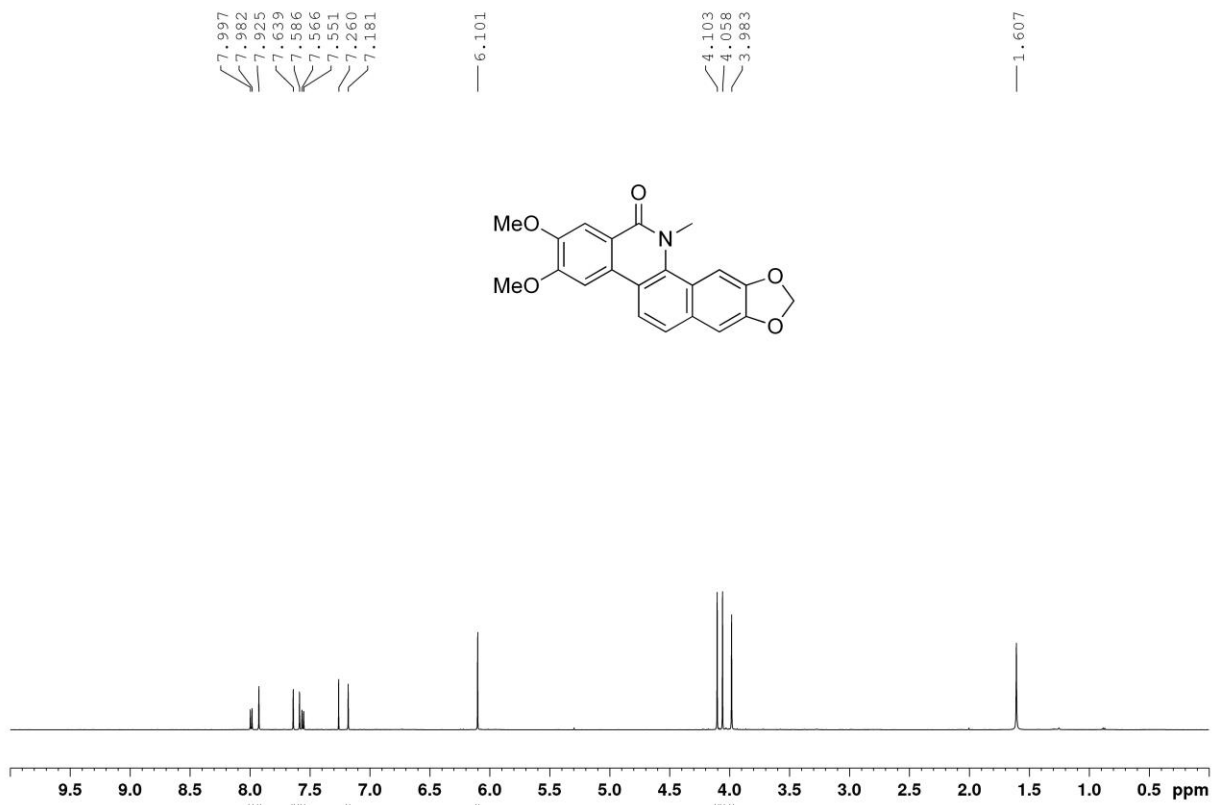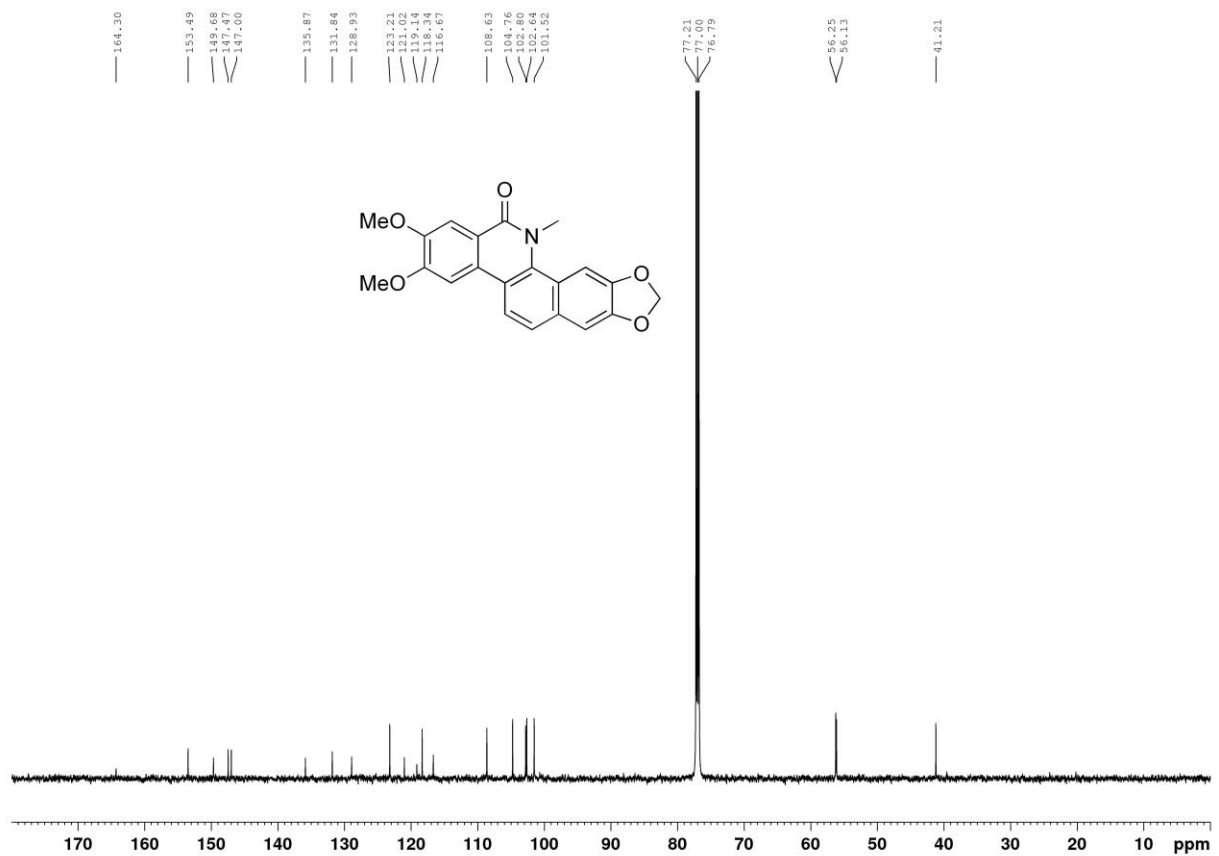

Nitidine Chloride (DMSO-*d*<sub>6</sub> for <sup>1</sup>H NMR and CDCl<sub>3</sub> for <sup>13</sup>C NMR, 600 MHz)

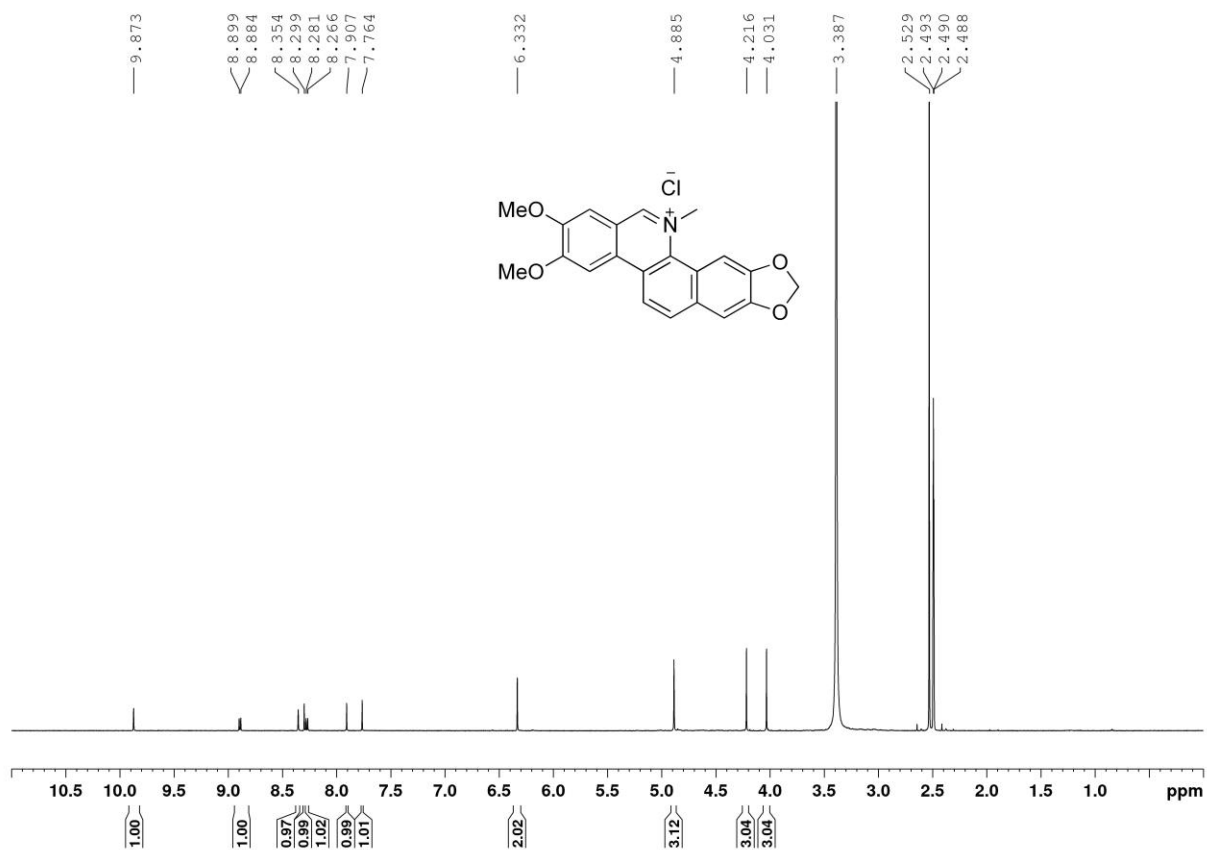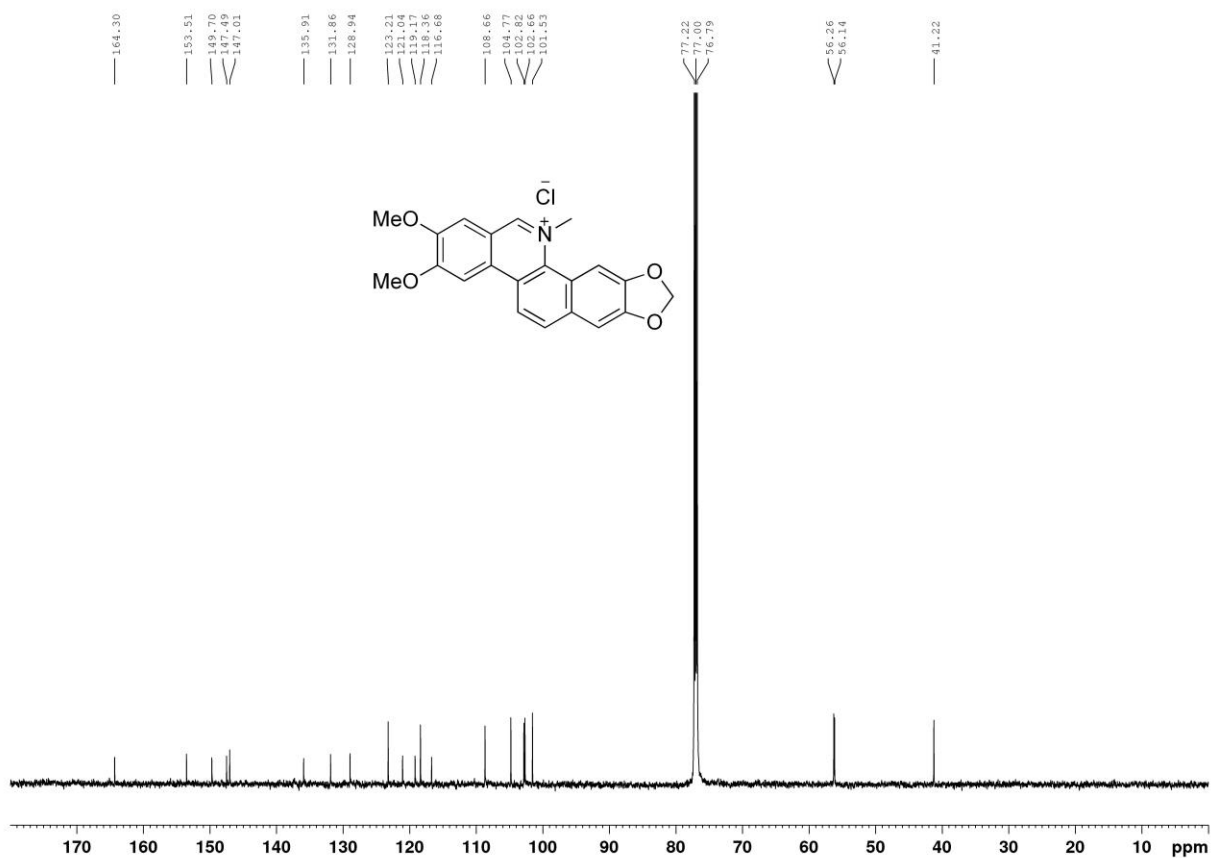

2-(Methylcarbamoyl)phenyltrifluoromethanesulfonate (1a-f) (600 MHz)

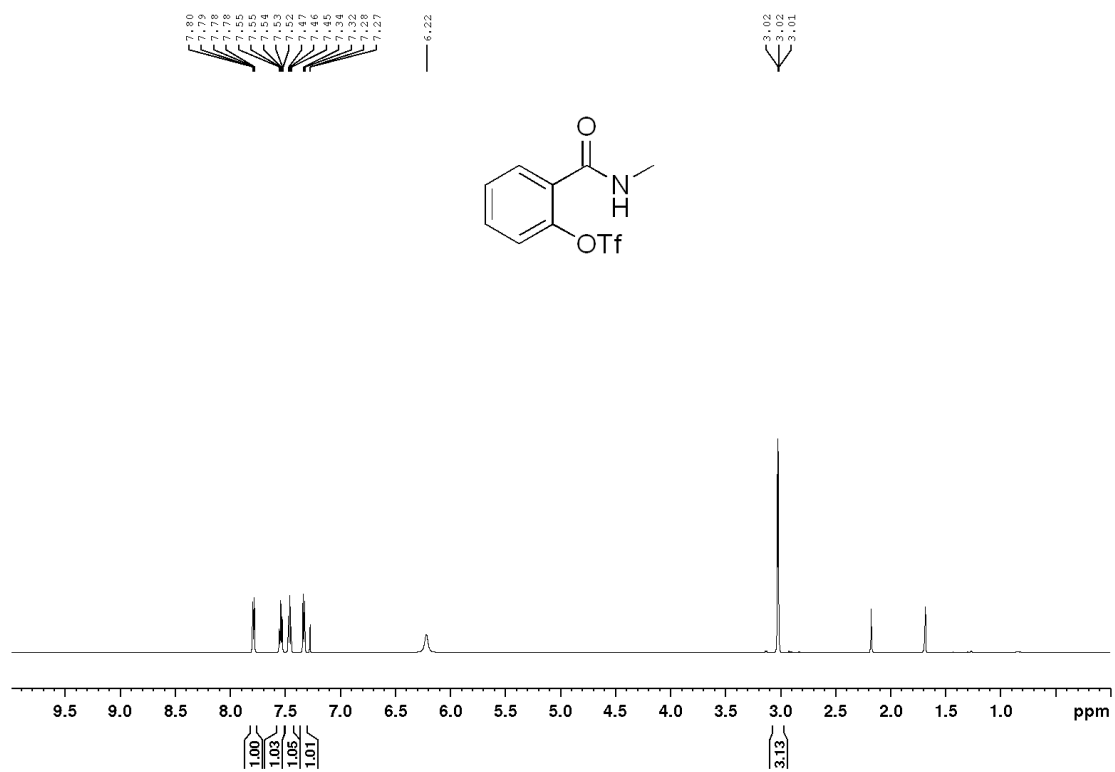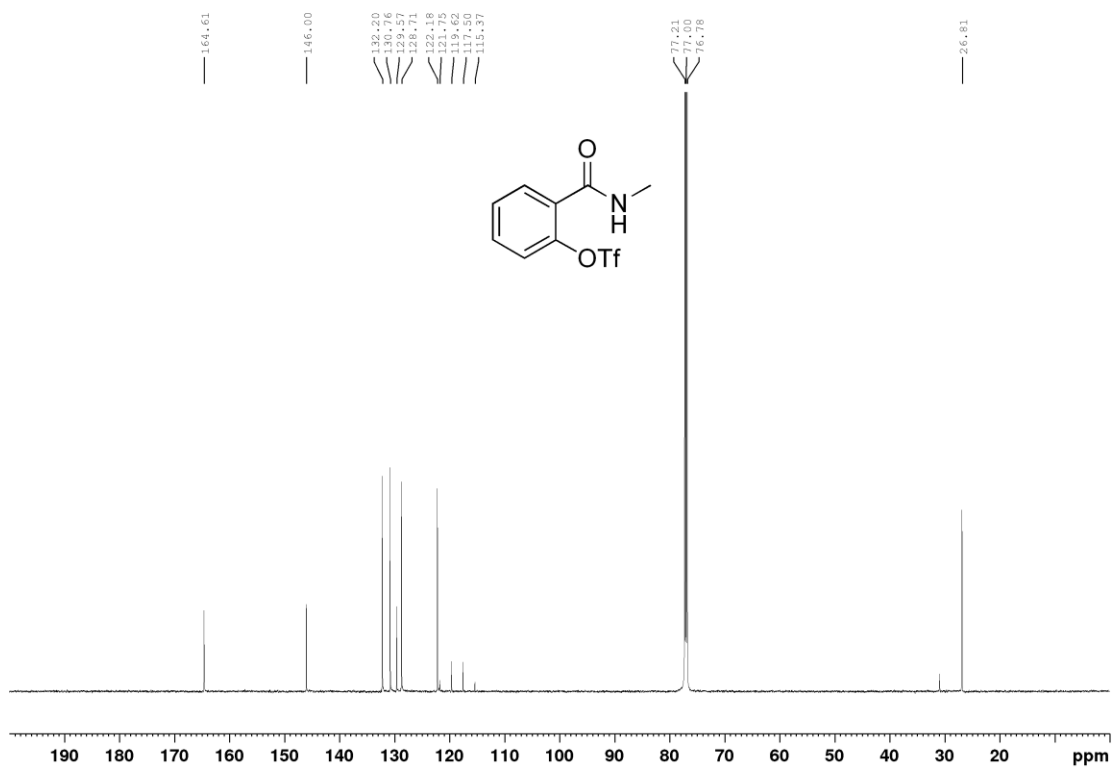

Deuterated product 4a-D (600 MHz)

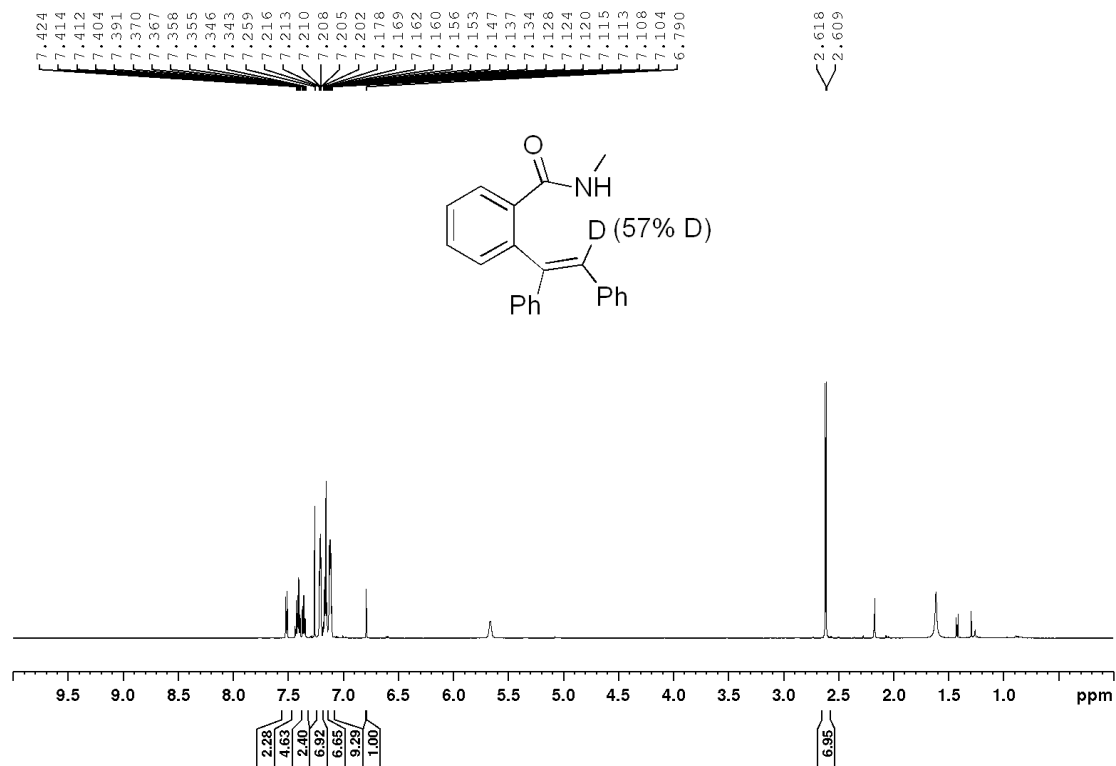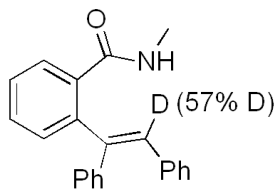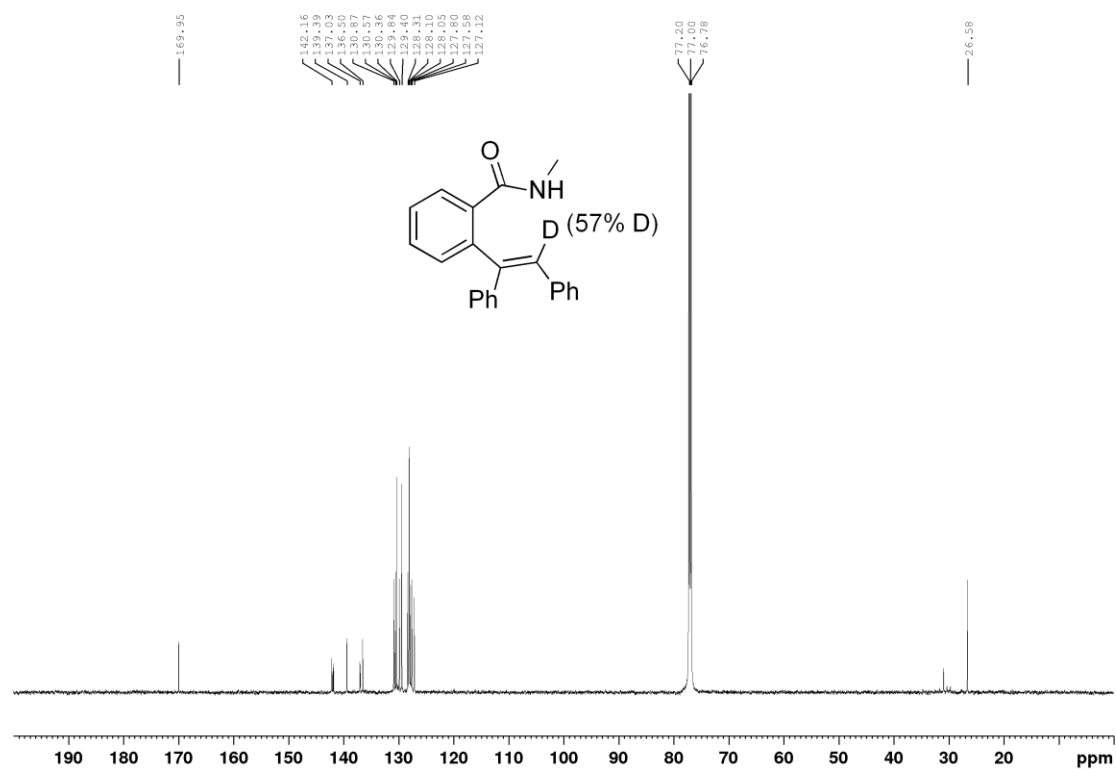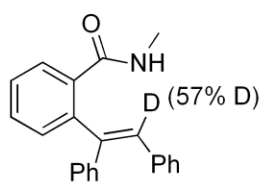

NOE spectrum of 3x (600 MHz)

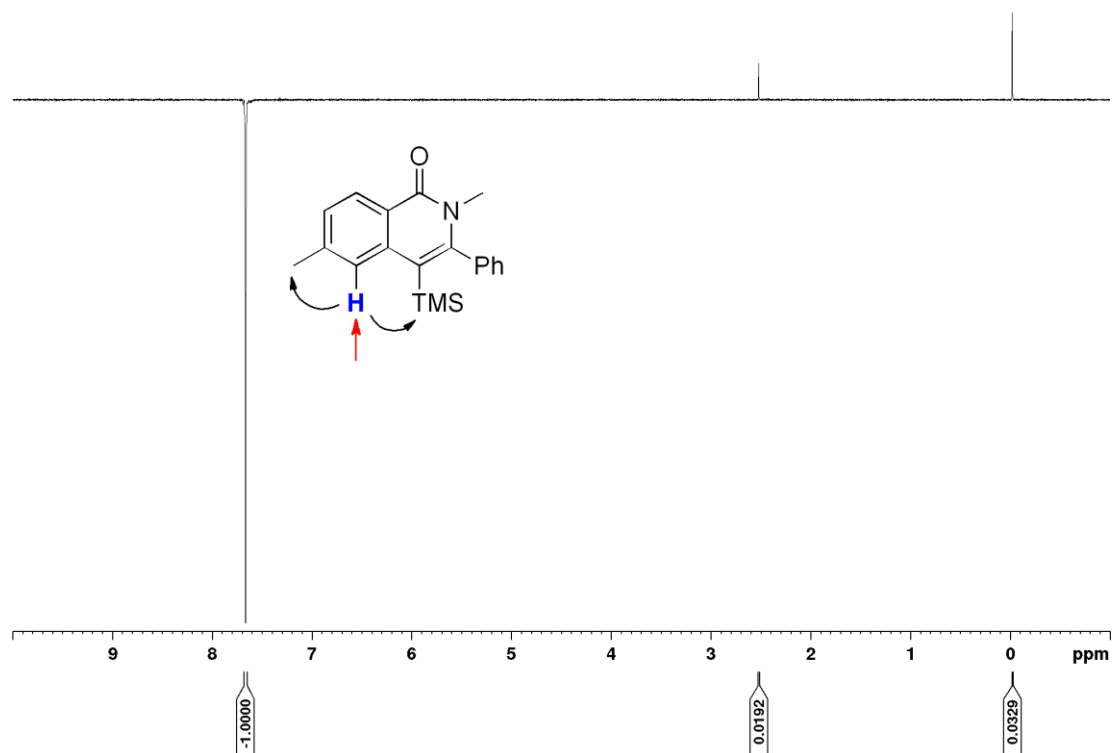

## Single-Crystal X-Ray Diffraction Analysis:

### X-Ray Structure of Compound 3a:

(CCDC 2087800 (**3a**)) contains the supplementary crystallographic data for this paper. These data can be obtained free of charge from The Cambridge Crystallographic Data Centre via [www.ccdc.cam.ac.uk/data\\_request/cif](http://www.ccdc.cam.ac.uk/data_request/cif).)

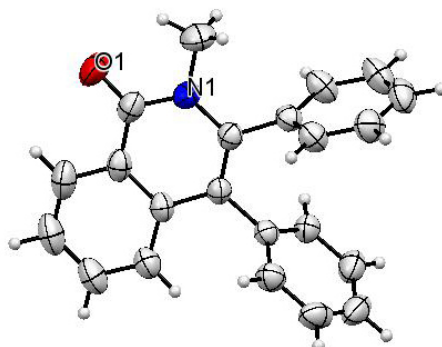

**Figure S1.** X-ray crystal structure of **3a**. Ellipsoids are drawn at the 50% probability level.

**Table S4.** Crystal data and structure refinement for **3a**.

|                                   |                                             |                  |
|-----------------------------------|---------------------------------------------|------------------|
| Identification code               | 1_a                                         |                  |
| Empirical formula                 | C <sub>22</sub> H <sub>17</sub> NO          |                  |
| Formula weight                    | 311.36                                      |                  |
| Temperature                       | 296(2) K                                    |                  |
| Wavelength                        | 0.71073 Å                                   |                  |
| Crystal system                    | Triclinic                                   |                  |
| Space group                       | P-1                                         |                  |
| Unit cell dimensions              | a = 9.3912(2) Å                             | a = 69.3430(10)° |
|                                   | b = 9.6810(3) Å                             | b = 66.3600(10)° |
|                                   | c = 10.9201(3) Å                            | g = 67.4890(10)° |
| Volume                            | 816.58(4) Å <sup>3</sup>                    |                  |
| Z                                 | 2                                           |                  |
| Density (calculated)              | 1.266 Mg/m <sup>3</sup>                     |                  |
| Absorption coefficient            | 0.077 mm <sup>-1</sup>                      |                  |
| F(000)                            | 328                                         |                  |
| Crystal size                      | ? x ? x ? mm <sup>3</sup>                   |                  |
| Theta range for data collection   | 2.343 to 28.052°                            |                  |
| Index ranges                      | -12<=h<=12, -12<=k<=12, -14<=l<=14          |                  |
| Reflections collected             | 32840                                       |                  |
| Independent reflections           | 3957 [R(int) = 0.0656]                      |                  |
| Completeness to theta = 25.242°   | 99.9 %                                      |                  |
| Refinement method                 | Full-matrix least-squares on F <sup>2</sup> |                  |
| Data/restraints/parameters        | 3957/0/218                                  |                  |
| Goodness-of-fit on F <sup>2</sup> | 1.051                                       |                  |
| Final R indices [I>2sigma(I)]     | R1 = 0.0565, wR2 = 0.1232                   |                  |
| R indices (all data)              | R1 = 0.1061, wR2 = 0.1513                   |                  |
| Extinction coefficient            | n/a                                         |                  |
| Largest diff. peak and hole       | 0.193 and -0.209 e.Å <sup>-3</sup>          |                  |

### X-Ray Structure of Compound 4a:

(CCDC 2087801 (4a) contains the supplementary crystallographic data for this paper. These data can be obtained free of charge from The Cambridge Crystallographic Data Centre via [www.ccdc.cam.ac.uk/data\\_request/cif](http://www.ccdc.cam.ac.uk/data_request/cif).)

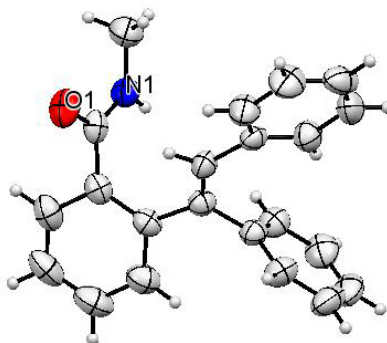

**Figure S2.** X-ray crystal structure of **4a**. Ellipsoids are drawn at the 50% probability level.

**Table S5.** Crystal data and structure refinement for **4a**.

|                                   |                                             |               |
|-----------------------------------|---------------------------------------------|---------------|
| Identification code               | GP_75P                                      |               |
| Empirical formula                 | C <sub>22</sub> H <sub>19</sub> NO          |               |
| Formula weight                    | 313.38                                      |               |
| Temperature                       | 296(2) K                                    |               |
| Wavelength                        | 0.71073 Å                                   |               |
| Crystal system                    | Monoclinic                                  |               |
| Space group                       | P2 <sub>1</sub> /n                          |               |
| Unit cell dimensions              | a = 13.0738(5) Å                            | = 90°.        |
|                                   | b = 8.9358(4) Å                             | = 92.019(2)°. |
|                                   | c = 14.7988(7) Å                            | = 90°.        |
| Volume                            | 1727.79(13) Å <sup>3</sup>                  |               |
| Z                                 | 4                                           |               |
| Density (calculated)              | 1.205 Mg/m <sup>3</sup>                     |               |
| Absorption coefficient            | 0.073 mm <sup>-1</sup>                      |               |
| F(000)                            | 664                                         |               |
| Crystal size                      | ? x ? x ? mm <sup>3</sup>                   |               |
| Theta range for data collection   | 2.663 to 28.318°.                           |               |
| Index ranges                      | -17<=h<=16, -11<=k<=11, -19<=l<=19          |               |
| Reflections collected             | 40164                                       |               |
| Independent reflections           | 4266 [R(int) = 0.1175]                      |               |
| Completeness to theta = 25.242°   | 99.6 %                                      |               |
| Refinement method                 | Full-matrix least-squares on F <sup>2</sup> |               |
| Data/restraints/parameters        | 4266/0/218                                  |               |
| Goodness-of-fit on F <sup>2</sup> | 1.099                                       |               |
| Final R indices [I>2sigma(I)]     | R1 = 0.0828, wR2 = 0.1294                   |               |
| R indices (all data)              | R1 = 0.1618, wR2 = 0.1556                   |               |
| Extinction coefficient            | n/a                                         |               |
| Largest diff. peak and hole       | 0.140 and -0.171 e.Å <sup>-3</sup>          |               |

### X-Ray Structure of Compound 3w:

(CCDC 2087803 (3w) contains the supplementary crystallographic data for this paper. These data can be obtained free of charge from The Cambridge Crystallographic Data Centre via [www.ccdc.cam.ac.uk/data\\_request/cif](http://www.ccdc.cam.ac.uk/data_request/cif).)

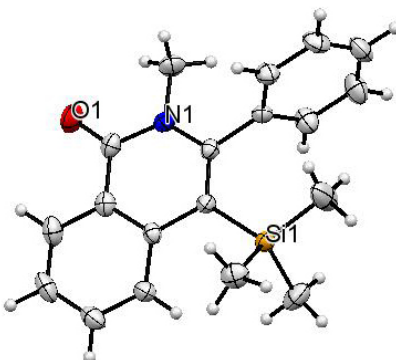

**Figure S3.** X-ray crystal structure of 3w. Ellipsoids are drawn at the 50% probability level.

**Table S6.** Crystal data and structure refinement for 3w.

|                                   |                                             |                  |
|-----------------------------------|---------------------------------------------|------------------|
| Identification code               | d23248                                      |                  |
| Empirical formula                 | C <sub>19</sub> H <sub>21</sub> NOSi        |                  |
| Formula weight                    | 307.46                                      |                  |
| Temperature                       | 200(2) K                                    |                  |
| Wavelength                        | 0.71073 Å                                   |                  |
| Crystal system                    | Triclinic                                   |                  |
| Space group                       | P -1                                        |                  |
| Unit cell dimensions              | a = 8.9558(3) Å                             | = 102.940(2)°.   |
|                                   | b = 9.7312(4) Å                             | = 96.5450(10)°.  |
|                                   | c = 10.0870(4) Å                            | = 103.5060(10)°. |
| Volume                            | 820.15(5) Å <sup>3</sup>                    |                  |
| Z                                 | 2                                           |                  |
| Density (calculated)              | 1.245 Mg/m <sup>3</sup>                     |                  |
| Absorption coefficient            | 0.145 mm <sup>-1</sup>                      |                  |
| F(000)                            | 328                                         |                  |
| Crystal size                      | 0.68 x 0.47 x 0.40 mm <sup>3</sup>          |                  |
| Theta range for data collection   | 2.23 to 25.09°.                             |                  |
| Index ranges                      | -10<=h<=10, -11<=k<=11, -12<=l<=12          |                  |
| Reflections collected             | 11110                                       |                  |
| Independent reflections           | 2884 [R(int) = 0.0364]                      |                  |
| Completeness to theta = 25.09°    | 99.0 %                                      |                  |
| Absorption correction             | multi-scan                                  |                  |
| Max. and min. transmission        | 0.9444 and 0.9080                           |                  |
| Refinement method                 | Full-matrix least-squares on F <sup>2</sup> |                  |
| Data/restraints/parameters        | 2884/0/203                                  |                  |
| Goodness-of-fit on F <sup>2</sup> | 1.047                                       |                  |
| Final R indices [I>2sigma(I)]     | R1 = 0.0450, wR2 = 0.1275                   |                  |
| R indices (all data)              | R1 = 0.0493, wR2 = 0.1306                   |                  |
| Largest diff. peak and hole       | 0.320 and -0.285 e.Å <sup>-3</sup>          |                  |



### X-Ray Structure of Compound 4v':

(CCDC 2109230 (4v')) contains the supplementary crystallographic data for this paper. These data can be obtained free of charge from The Cambridge Crystallographic Data Centre via [www.ccdc.cam.ac.uk/data\\_request/cif](http://www.ccdc.cam.ac.uk/data_request/cif).)

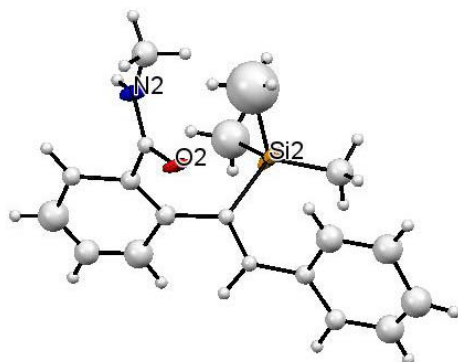

**Figure S4.** X-ray crystal structure of 4v'. Ellipsoids are drawn at the 50% probability level.

**Table S7.** Crystal data and structure refinement for 4v'.

|                                   |                                             |               |
|-----------------------------------|---------------------------------------------|---------------|
| Identification code               | d23470                                      |               |
| Empirical formula                 | C <sub>19</sub> H <sub>23</sub> NOSi        |               |
| Formula weight                    | 309.47                                      |               |
| Temperature                       | 200(2) K                                    |               |
| Wavelength                        | 0.71073 Å                                   |               |
| Crystal system                    | Triclinic                                   |               |
| Space group                       | P -1                                        |               |
| Unit cell dimensions              | a = 10.156(3) Å                             | = 101.448(7)° |
|                                   | b = 13.973(3) Å                             | = 95.499(8)°  |
|                                   | c = 21.035(5) Å                             | = 110.186(6)° |
| Volume                            | 2702.1(11) Å <sup>3</sup>                   |               |
| Z                                 | 4                                           |               |
| Density (calculated)              | 0.761 Mg/m <sup>3</sup>                     |               |
| Absorption coefficient            | 0.088 mm <sup>-1</sup>                      |               |
| F(000)                            | 664                                         |               |
| Crystal size                      | 0.79 x 0.03 x 0.01 mm <sup>3</sup>          |               |
| Theta range for data collection   | 2.01 to 25.11°                              |               |
| Index ranges                      | -12<=h<=12, -16<=k<=16, -25<=l<=25          |               |
| Reflections collected             | 56021                                       |               |
| Independent reflections           | 9592 [R(int) = 0.2132]                      |               |
| Completeness to theta = 25.11°    | 99.6 % Absorption correction                | multi-scan    |
| Max. and min. transmission        | 0.9991 and 0.9337                           |               |
| Refinement method                 | Full-matrix least-squares on F <sup>2</sup> |               |
| Data / restraints / parameters    | 9592/12/201                                 |               |
| Goodness-of-fit on F <sup>2</sup> | 1.686                                       |               |
| Final R indices [I>2sigma(I)]     | R1 = 0.2415, wR2 = 0.5306                   |               |
| R indices (all data)              | R1 = 0.3061, wR2 = 0.5518                   |               |
| Largest diff. peak and hole       | 0.640 and -1.702 e.Å <sup>-3</sup>          |               |

### X-Ray Structure of Compound 5:

(CCDC 2087805 (5) contains the supplementary crystallographic data for this paper. These data can be obtained free of charge from The Cambridge Crystallographic Data Centre via [www.ccdc.cam.ac.uk/data\\_request/cif](http://www.ccdc.cam.ac.uk/data_request/cif).)

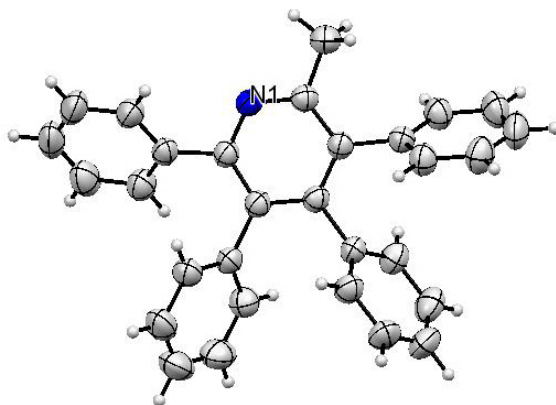

**Figure S5.** X-ray crystal structure of 5. Ellipsoids are drawn at the 50% probability level.

**Table S8.** Crystal data and structure refinement for 5.

|                                   |                                             |              |
|-----------------------------------|---------------------------------------------|--------------|
| Identification code               | 19AP04_1                                    |              |
| Empirical formula                 | C <sub>30</sub> H <sub>23</sub> N           |              |
| Formula weight                    | 397.2                                       |              |
| Temperature                       | 296(2) K                                    |              |
| Wavelength                        | 0.71073 Å                                   |              |
| Crystal system                    | Triclinic                                   |              |
| Space group                       | P-1                                         |              |
| Unit cell dimensions              | a = 6.5913(10) Å                            | = 69.396(4)° |
|                                   | b = 11.309(2) Å                             | = 84.651(7)° |
|                                   | c = 16.066(4) Å                             | = 88.169(4)° |
| Volume                            | 1116.1(4) Å <sup>3</sup>                    |              |
| Z                                 | 4                                           |              |
| Density (calculated)              | 1.183 Mg/m <sup>3</sup>                     |              |
| Absorption coefficient            | 0.068 mm <sup>-1</sup>                      |              |
| F(000)                            | 420                                         |              |
| Crystal size                      | 0.391 x 0.069 x 0.060 mm <sup>3</sup>       |              |
| Theta range for data collection   | 2.718 to 28.355°                            |              |
| Index ranges                      | -8<=h<=8, -15<=k<=15, -21<=l<=21            |              |
| Reflections collected             | 91333                                       |              |
| Independent reflections           | 5569 [R(int) = 0.0462]                      |              |
| Completeness to theta = 25.242°   | 99.8 %                                      |              |
| Absorption correction             | Numerical Mu Calculated                     |              |
| Max. and min. transmission        | 0.7457 and 0.7106                           |              |
| Refinement method                 | Full-matrix least-squares on F <sup>2</sup> |              |
| Data/restraints/parameters        | 5569/0/281                                  |              |
| Goodness-of-fit on F <sup>2</sup> | 1.030                                       |              |
| Final R indices [I>2sigma(I)]     | R1 = 0.0453, wR2 = 0.1143                   |              |
| R indices (all data)              | R1 = 0.0651, wR2 = 0.1292                   |              |
| Extinction coefficient            | n/a                                         |              |
| Largest diff. peak and hole       | 0.178 and -0.146 e.Å <sup>-3</sup>          |              |

### X-Ray Structure of Compound 6:

(CCDC 2089397 (6) contains the supplementary crystallographic data for this paper. These data can be obtained free of charge from The Cambridge Crystallographic Data Centre via [www.ccdc.cam.ac.uk/data\\_request/cif](http://www.ccdc.cam.ac.uk/data_request/cif).)

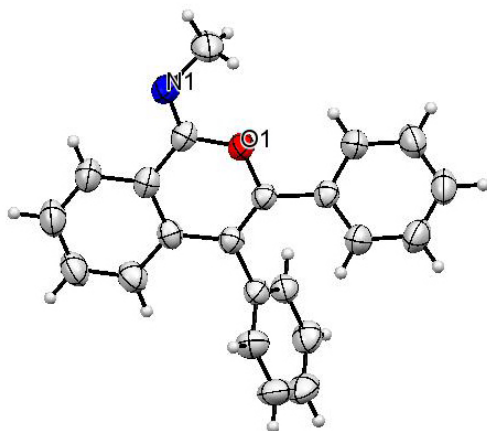

**Figure S6.** X-ray crystal structure of **6**. Ellipsoids are drawn at the 50% probability level.

**Table S9.** Crystal data and structure refinement for **6**.

|                                   |                                                   |                |
|-----------------------------------|---------------------------------------------------|----------------|
| Identification code               | 02_a                                              |                |
| Empirical formula                 | C <sub>22</sub> H <sub>17</sub> NO                |                |
| Formula weight                    | 311.36                                            |                |
| Temperature                       | 296(2) K                                          |                |
| Wavelength                        | 0.71073 Å                                         |                |
| Crystal system                    | Monoclinic                                        |                |
| Space group                       | <i>P</i> 2 <sub>1</sub> / <i>n</i>                |                |
| Unit cell dimensions              | a = 8.8118(4) Å                                   | = 90°.         |
|                                   | b = 18.3413(8) Å                                  | = 102.612(2)°. |
|                                   | c = 10.4793(5) Å                                  | = 90°.         |
| Volume                            | 1652.80(13) Å <sup>3</sup>                        |                |
| Z                                 | 4                                                 |                |
| Density (calculated)              | 1.251 Mg/m <sup>3</sup>                           |                |
| Absorption coefficient            | 0.076 mm <sup>-1</sup>                            |                |
| F(000)                            | 656                                               |                |
| Crystal size                      | 0.468 x 0.272 x 0.214 mm <sup>3</sup>             |                |
| Theta range for data collection   | 2.221 to 28.343°.                                 |                |
| Index ranges                      | -11 ≤ h ≤ 11, -24 ≤ k ≤ 24, -13 ≤ l ≤ 13          |                |
| Reflections collected             | 25049                                             |                |
| Independent reflections           | 4104 [R(int) = 0.0452]                            |                |
| Completeness to theta = 25.242°   | 99.4 %                                            |                |
| Absorption correction             | Numerical Mu Calculated                           |                |
| Max. and min. transmission        | 0.7379 and 0.7199                                 |                |
| Refinement method                 | Full-matrix least-squares on F <sup>2</sup>       |                |
| Data / restraints / parameters    | 4104 / 0 / 218                                    |                |
| Goodness-of-fit on F <sup>2</sup> | 1.068                                             |                |
| Final R indices [I > 2σ(I)]       | R <sub>1</sub> = 0.0570, wR <sub>2</sub> = 0.1543 |                |
| R indices (all data)              | R <sub>1</sub> = 0.0745, wR <sub>2</sub> = 0.1695 |                |
| Extinction coefficient            | n/a                                               |                |
| Largest diff. peak and hole       | 0.354 and -0.193 e.Å <sup>-3</sup>                |                |

### X-Ray Structure of Compound 7:

(CCDC 2087808 (7) contains the supplementary crystallographic data for this paper. These data can be obtained free of charge from The Cambridge Crystallographic Data Centre via [www.ccdc.cam.ac.uk/data\\_request/cif](http://www.ccdc.cam.ac.uk/data_request/cif).)

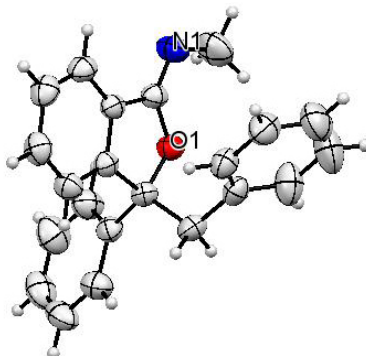

**Figure S7.** X-ray crystal structure of 7. Ellipsoids are drawn at the 50% probability level.

**Table S10.** Crystal data and structure refinement for 7.

|                                   |                                             |                  |
|-----------------------------------|---------------------------------------------|------------------|
| Identification code               | 19JUN01                                     |                  |
| Empirical formula                 | C <sub>22</sub> H <sub>19</sub> NO          |                  |
| Formula weight                    | 313.38                                      |                  |
| Temperature                       | 296(2) K                                    |                  |
| Wavelength                        | 0.71073 Å                                   |                  |
| Crystal system                    | Monoclinic                                  |                  |
| Space group                       | P2 <sub>1</sub> /c                          |                  |
| Unit cell dimensions              | a = 12.0230(3) Å                            | = 90°.           |
|                                   | b = 7.74160(10) Å                           | = 103.8500(10)°. |
|                                   | c = 19.2617(4) Å                            | = 90°.           |
| Volume                            | 1740.70(6) Å <sup>3</sup>                   |                  |
| Z                                 | 4                                           |                  |
| Density (calculated)              | 1.196 Mg/m <sup>3</sup>                     |                  |
| Absorption coefficient            | 0.073 mm <sup>-1</sup>                      |                  |
| F(000)                            | 664                                         |                  |
| Crystal size                      | 0.510 x 0.270 x 0.152 mm <sup>3</sup>       |                  |
| Theta range for data collection   | 2.848 to 28.316°.                           |                  |
| Index ranges                      | -16<=h<=15, -10<=k<=10, -25<=l<=25          |                  |
| Reflections collected             | 28519                                       |                  |
| Independent reflections           | 4302 [R(int) = 0.0433]                      |                  |
| Completeness to theta = 25.242°   | 99.6 %                                      |                  |
| Absorption correction             | Numerical Mu Calculated                     |                  |
| Max. and min. transmission        | 0.7457 and 0.7231                           |                  |
| Refinement method                 | Full-matrix least-squares on F <sup>2</sup> |                  |
| Data/restraints/parameters        | 4302/0/218                                  |                  |
| Goodness-of-fit on F <sup>2</sup> | 1.045                                       |                  |
| Final R indices [I>2sigma(I)]     | R1 = 0.0488, wR2 = 0.1079                   |                  |
| R indices (all data)              | R1 = 0.0787, wR2 = 0.1268                   |                  |
| Extinction coefficient            | n/a                                         |                  |
| Largest diff. peak and hole       | 0.159 and -0.155 e.Å <sup>-3</sup>          |                  |
